# Supplementary material for: Experimental and computational investigation of heteroatom substitution in nucleolytic Cu(ii) cyclen complexes for balancing stability and redox activity
Source: Royal Society of Chemistry journal article supplement (doi:10.1039/d2dt03284h), 2023-01-01
Supplement: d2dt03284h1.pdf [file d2dt03284h1.pdf]

## Supporting Information

### Experimental and Computational Investigation of Heteroatom Substitution in Nucleolytic Cu(II) Cyclen Complexes for Balancing Stability and Redox Activity

*Jan Hormann,<sup>a</sup> Olga Verbitsky,<sup>b</sup> Xiaoyu Zhou,<sup>c</sup> Beatrice Battistella,<sup>a,d</sup> Margarete van der Meer,<sup>a</sup>  
Biprajit Sarkar,<sup>a,e</sup> Cunyuan Zhao,<sup>c\*</sup> Nora Kulak<sup>a,b\*</sup>*

<sup>a</sup> Institut für Chemie und Biochemie, Freie Universität Berlin, Fabeckstr. 34/36, 14195 Berlin,  
Germany

<sup>b</sup> Institut für Chemie, Otto-von-Guericke-Universität Magdeburg, Universitätsplatz 2, 39106  
Magdeburg, Germany

<sup>c</sup> MOE Key Laboratory of Bioinorganic and Synthetic Chemistry, School of Chemistry, Sun Yat-Sen  
University, XinGang Rd. W., Guangzhou 510275, China

<sup>d</sup> Department of Chemistry, Humboldt Universität zu Berlin, Brook-Taylor-Str. 2, 12489 Berlin,  
Germany

<sup>e</sup> Institut für Anorganische Chemie, Universität Stuttgart, Pfaffenwaldring 55, 70569 Stuttgart,  
Germany.

**S-1 Synthesis of ligands and complexes**

**S-2 UV/VIS, IR and EPR spectroscopy**

**S-3 X-ray crystallography**

**S-4 Summary of stability constants**

**S-5 Further DNA cleavage studies and ROS detection**

**S-6 BNPP assay**

**S-7 Computational studies: Intrinsic reaction coordinates, structural  
parameters and cartesian coordinates of optimized structures**

**References**

## S-1 Synthesis of ligands and complexes

### [Cu([12]aneN<sub>4</sub>)NO<sub>3</sub>]<sub>2</sub>NO<sub>3</sub> (CuL<sup>1</sup>)

This complex was synthesized according to a procedure previously published by our lab.<sup>1</sup>

### [Cu([12]aneN<sub>3</sub>S)NO<sub>3</sub>]<sub>2</sub>NO<sub>3</sub> (CuL<sup>2</sup>)

This complex was synthesized according to a procedure previously published by our lab.<sup>1</sup>

### [Cu([12]aneN<sub>2</sub>S<sub>2</sub>)(NO<sub>3</sub>)<sub>2</sub>]<sub>2</sub>NO<sub>3</sub> (CuL<sup>3</sup>)

*N,N'*-(Ethane-1,2-diyl)bis(2-chloroacetamide) (CAS 2620-09-9),<sup>2</sup> 1,4-dithia-7,10-diazacyclododecane-6,11-dione (CAS 90777-30-3)<sup>3</sup> and 1,4-dithia-7,10-diazacyclododecane (CAS 88439-31-0, L<sup>3</sup>)<sup>3</sup> were synthesized as previously described.

[12]aneN<sub>2</sub>S<sub>2</sub> (L<sup>3</sup>) (152.0 mg, 0.7 mmol) was dissolved in 3.5 mL methanol and heated under reflux. A solution of Cu(NO<sub>3</sub>)<sub>2</sub> · 3 H<sub>2</sub>O (174.0 mg, 0.7 mmol) in 3.5 mL methanol was added and heated under reflux for another 10 min. The solution was cooled down to -18 °C, the precipitated dark blue solid was filtered and dried *in vacuo*. Crystals suitable for X-ray analysis were obtained by slow diffusion of diethyl ether into a methanolic solution of the complex. Yield: 122.0 mg (0.3 mmol, 43%). Elemental analysis (Cu(C<sub>8</sub>H<sub>18</sub>N<sub>2</sub>S<sub>2</sub>)(NO<sub>3</sub>)<sub>2</sub> · 0.25 CH<sub>3</sub>OH) calcd. C 24.65, H 4.76, N 13.94 and S 15.95%; found C 24.31, H 4.61, N 13.60 and S 16.29%; max. deviation [%] 0.34. UV/VIS (50 mM Tris-HCl, pH 7.4): λ<sub>max</sub> (ε) = 650 nm (575 L mol<sup>-1</sup> cm<sup>-1</sup>). MS (ESI+) (m/z): calcd. for [M - 2NO<sub>3</sub> + Cl]<sup>+</sup> 303.9896; found 303.9925.

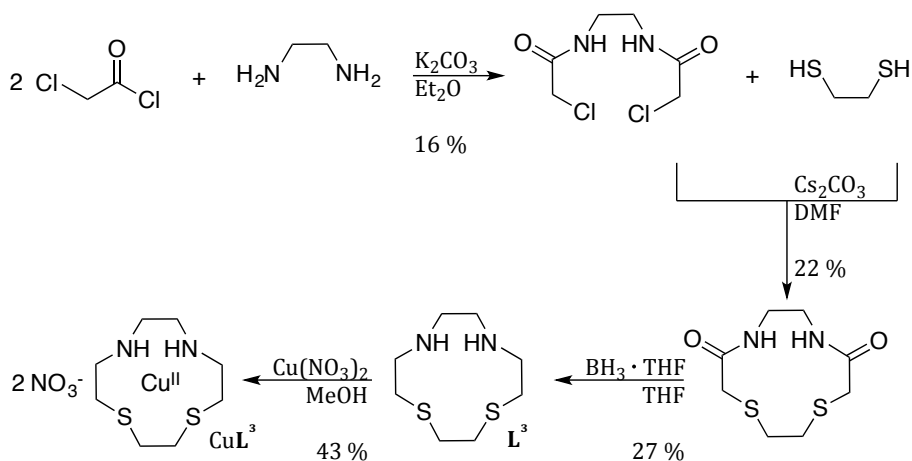

Scheme S-1.1 Synthesis of CuL<sup>3</sup>.

### [Cu([12]aneNSNS)(NO<sub>3</sub>)<sub>2</sub>]<sub>2</sub>NO<sub>3</sub> (CuL<sup>4</sup>)

2,2'-Thiodiacetylchloride (CAS 7646-91-5)<sup>4</sup>, bis(2-aminoethyl)sulfide (CAS 871-76-1)<sup>3</sup>, 1,7-dithia-4,10-diazacyclododecan-3,11-dione (CAS 90777-32-5)<sup>5</sup> and 1,7-dithia-4,10-diazacyclododecane (CAS 65113-45-3, L<sup>4</sup>)<sup>6</sup> were synthesized as previously described.

[12]aneNSNS (**L**<sup>4</sup>) (95.0 mg, 0.46 mmol) was dissolved in 1.5 mL ethanol and heated under reflux. A solution of Cu(NO<sub>3</sub>)<sub>2</sub> · 3 H<sub>2</sub>O (111.2 mg, 0.46 mmol) in 1.5 mL ethanol was added and heated under reflux for another 30 min. The solution was cooled down to room temperature, the precipitated dark-green needles were filtered off and dried *in vacuo*. Yield: 94.0 mg (0.24 mmol, 52%). Elemental analysis calcd. C 24.39, H 4.61, N 14.22 and S 16.28%; found C 24.50, H 4.65, N 14.28 and S 16.40%; max. deviation [%] 0.12. UV/VIS (50 mM Tris-HCl, pH 7.4): λ<sub>max</sub> (ε) = 651 nm (214 L mol<sup>-1</sup> cm<sup>-1</sup>). MS (ESI+) (m/z): calcd. for [M – 2NO<sub>3</sub> + Cl]<sup>+</sup> 303.9896; found 303.9919.

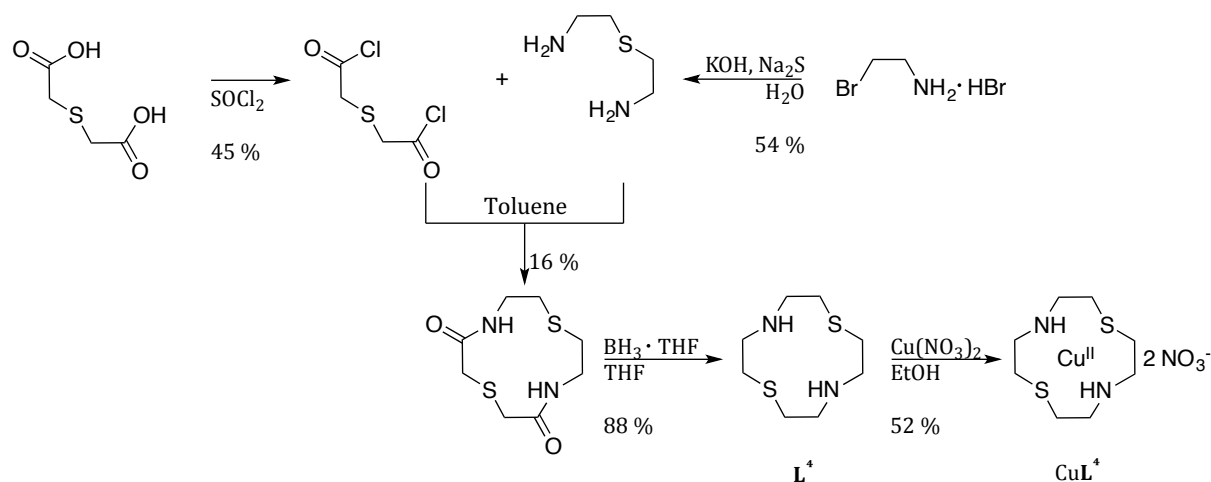

**Scheme S-1.2** Synthesis of CuL<sup>4</sup> (note: the yield of the cyclization step is low in comparison to the literature<sup>6</sup> since 1.5 instead of 2 equivalents of the amine were used inadvertently).

#### [Cu([12]aneNS<sub>3</sub>)(NO<sub>3</sub>)]NO<sub>3</sub> (CuL<sup>5</sup>)

Bis(2-chloroethyl)amine hydrochloride (CAS 821-48-7) was obtained from Merck. *N*-Boc-bis(2-chloroethyl)amine (CAS 118753-70-1)<sup>6</sup>, *N*-Boc-1,4,7-trithia-10-azacyclododecane (CAS 878673-76-8)<sup>3</sup> and 1,4,7-trithia-10-azacyclododecane (**L**<sup>5</sup>, CAS 122011-96-5)<sup>3</sup> were synthesized as previously described.

[12]aneNS<sub>3</sub> (**L**<sup>5</sup>) (110.3 mg, 0.5 mmol) was dissolved in 5 mL acetonitrile and heated to reflux. A solution of Cu(NO<sub>3</sub>)<sub>2</sub> · 3 H<sub>2</sub>O (119.3 mg, 0.5 mmol) in 1 mL acetonitrile was added and heated under reflux for another 10 min. The solution was cooled down to -18 °C, the precipitated dark green powder was filtered off and dried *in vacuo*. Yield: 80.0 mg (0.2 mmol, 39%). Elemental analysis calcd. C 23.38, H 4.17, N 10.22 and S 23.40%; found C 23.44, H 4.15, N 10.24 and S 23.40%; max. deviation [%] 0.06. UV/VIS (50 mM Tris-HCl, pH 7.4): λ<sub>max</sub> (ε) = 659 nm (497 L mol<sup>-1</sup> cm<sup>-1</sup>). MS (ESI+) (m/z): calcd. for [Cu<sup>I</sup>[12]aneNS<sub>3</sub>]<sup>+</sup> 285.9819; found 285.9928.

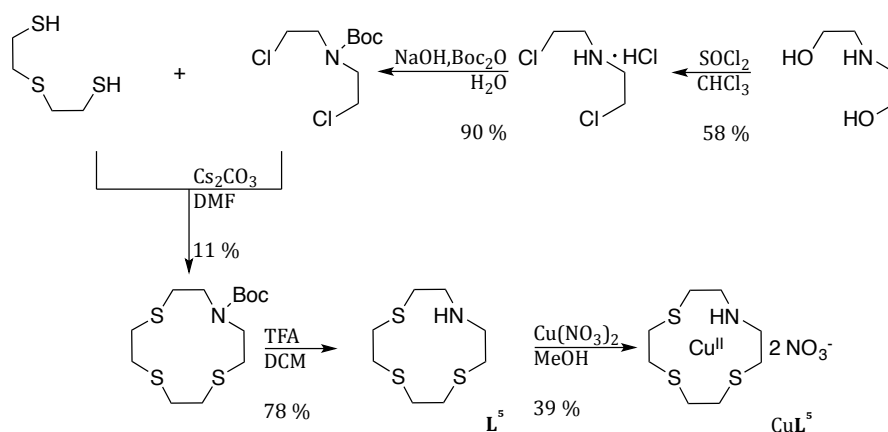

**Scheme S-1.3** Synthesis of  $\text{CuL}^5$ .

### $[\text{Cu}(\text{[12]aneNONS})(\text{NO}_3)]\text{NO}_3$ ( $\text{CuL}^6$ )

1,5-Bis(tolylsulfonyloxy)-3-oxapentane (CAS 7460-82-4),<sup>7</sup> bis[*p*-tolylsulfonylamino]ethane sulfide (CAS 85775-49-1)<sup>3</sup>, 4,10-bis(*p*-tolylsulfonyl)-1-oxa-7-thia-4,10-diazacyclododecane (CAS 221055-19-2)<sup>8</sup>, and 1-oxa-7-thia-4,10-diazacyclododecane (CAS 124775-44-6,  $\text{L}^6$ )<sup>9</sup> were synthesized as previously described with slight modifications (see caption of Scheme S-1.4).

Freshly sublimed [12]aneNONS ( $\text{L}^6$ ) (163.6 mg, 0.9 mmol) was dissolved in 3 mL ethanol and heated under reflux. A solution of  $\text{Cu}(\text{NO}_3)_2 \cdot 3 \text{H}_2\text{O}$  (208.0 mg, 0.9 mmol) in 3 mL ethanol was added and heated under reflux for another 20 min. The solution was cooled down to room temperature, the precipitated light-blue crystalline solid was filtered off and dried *in vacuo*. Crystals suitable for X-ray analysis were obtained by slow diffusion of diethyl ether into a methanolic solution of the complex, however, the obtained data were not of sufficient quality. Yield: 240.0 mg (0.6 mmol, 75%). Elemental analysis calcd. C 25.43, H 4.80, N 14.83 and S 8.48%; found C 25.53, H 4.62, N 14.63 and S 8.65%; max. deviation [%] 0.2. UV/VIS (50 mM Tris-HCl, pH 7.4):  $\lambda_{\text{max}}$  ( $\epsilon$ ) = 658 nm (58  $\text{L mol}^{-1} \text{cm}^{-1}$ ). MS (ESI+) ( $m/z$ ): calcd. for  $[\text{Cu}(\text{C}_8\text{H}_{18}\text{N}_2\text{OS})-\text{H}]^+$  252.0363; found 252.0390.

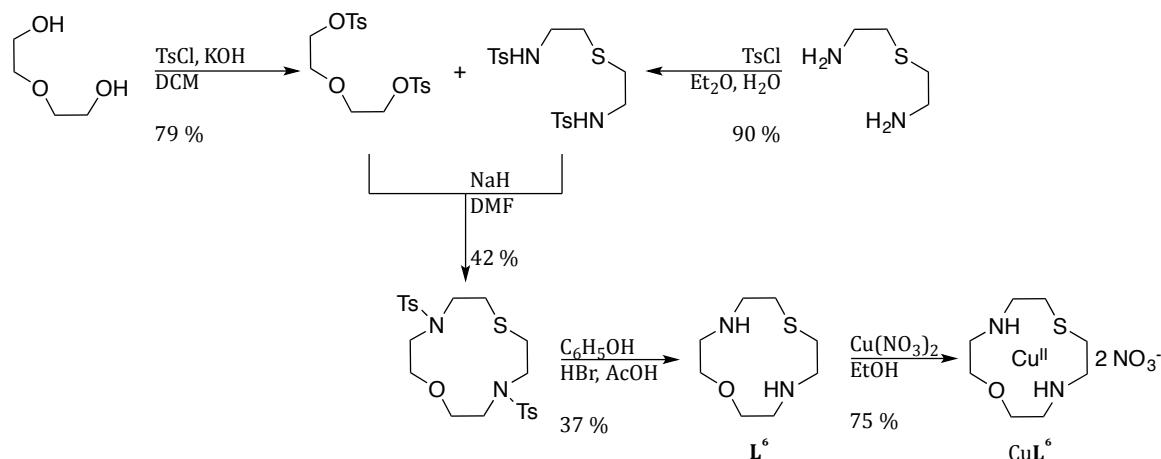

**Scheme S-1.4** Synthesis of  $\text{CuL}^6$  (note: the yield of the cyclization step might be lower than the literature<sup>9</sup> since the thioether as a starting material was prepared only *in situ* instead of isolating and purifying it; on the other hand the yield was twice as high than in that literature for the deprotection step).

## S-2 UV/VIS, IR and EPR spectroscopy

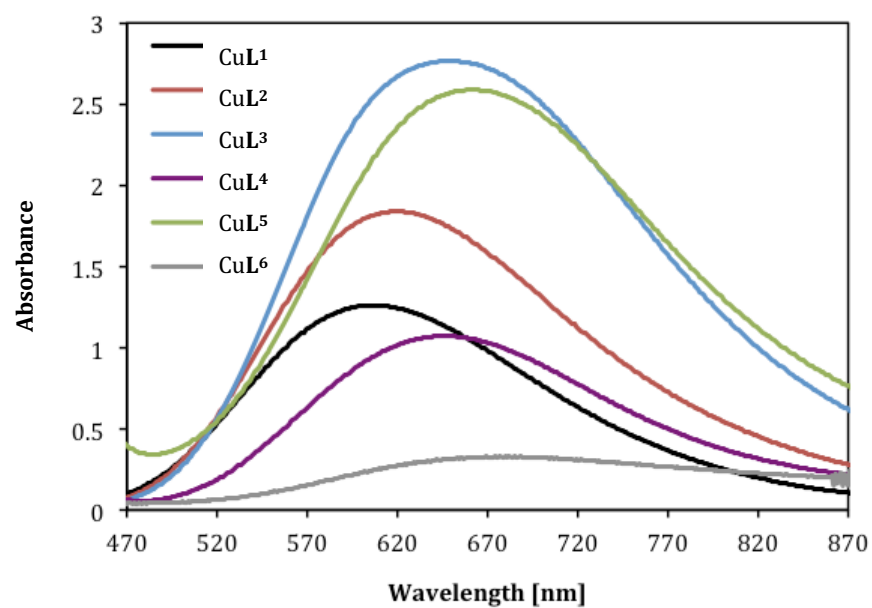

**Figure S-2.1** UV/VIS spectra of complexes CuL<sup>1</sup>-CuL<sup>6</sup> (5 mM) in 50 mM Tris-HCl buffer (pH 7.4).

**Table S-2** Maximum absorption wavelengths  $\lambda_{max}$  with corresponding extinction coefficients  $\epsilon$  for complexes CuL<sup>1</sup>-CuL<sup>6</sup>.

|                  | $\lambda_{max}$ [nm] | $\epsilon$ [L mol <sup>-1</sup> cm <sup>-1</sup> ] |
|------------------|----------------------|----------------------------------------------------|
| CuL <sup>1</sup> | 601                  | 235.9                                              |
| CuL <sup>2</sup> | 619                  | 377.0                                              |
| CuL <sup>3</sup> | 652                  | 575.0                                              |
| CuL <sup>4</sup> | 647                  | 208.4                                              |
| CuL <sup>5</sup> | 659                  | 497.2                                              |
| CuL <sup>6</sup> | 658                  | 57.9                                               |

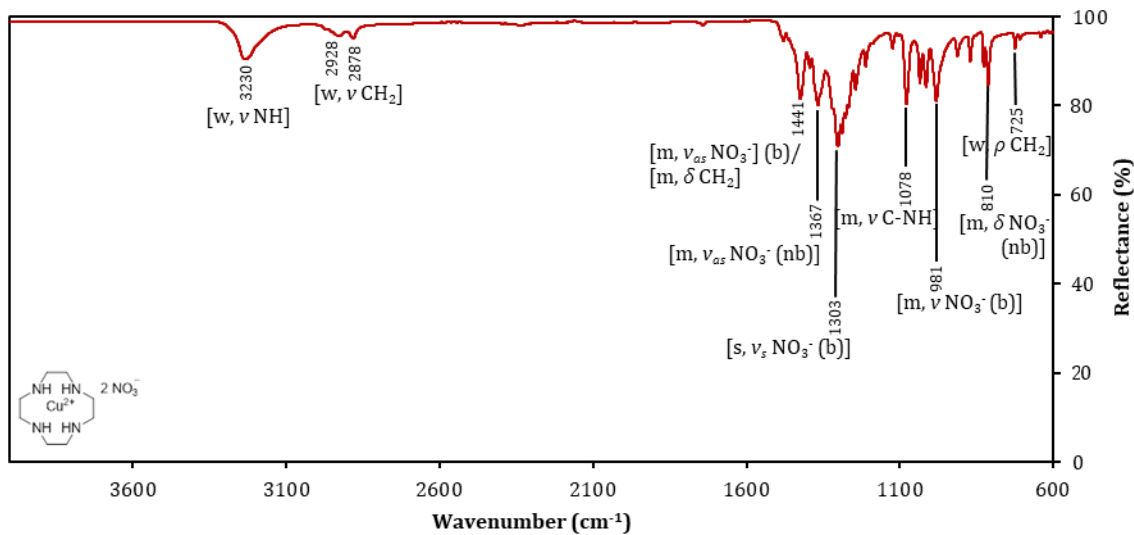

**Figure S-2.2a** IR spectrum of complex CuL<sup>1</sup> (for nitrate, nb=not bound/ionic, b=bound).

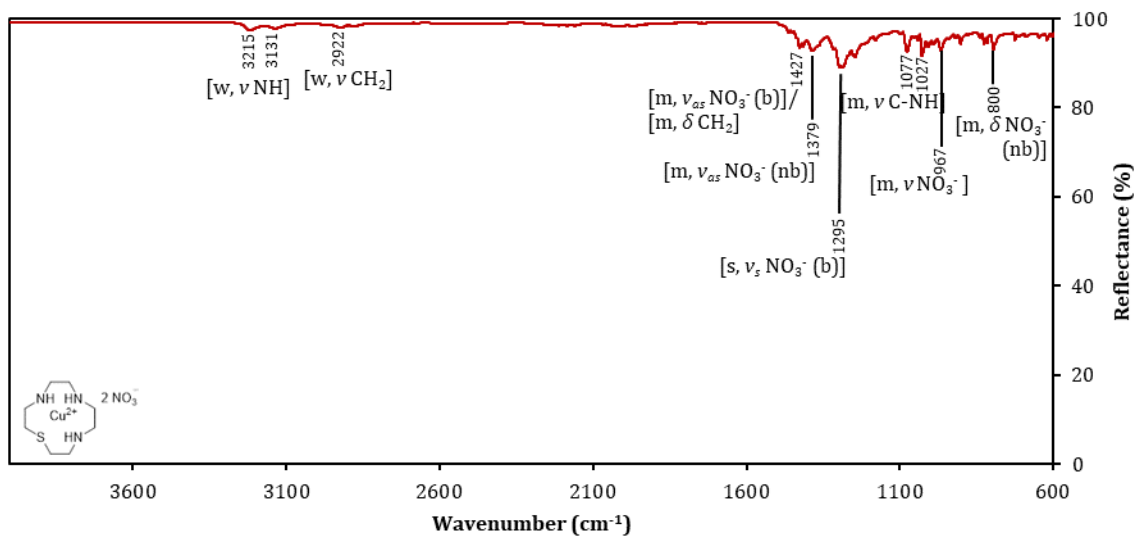

**Figure S-2.2b** IR spectrum of complex CuL<sup>2</sup>.

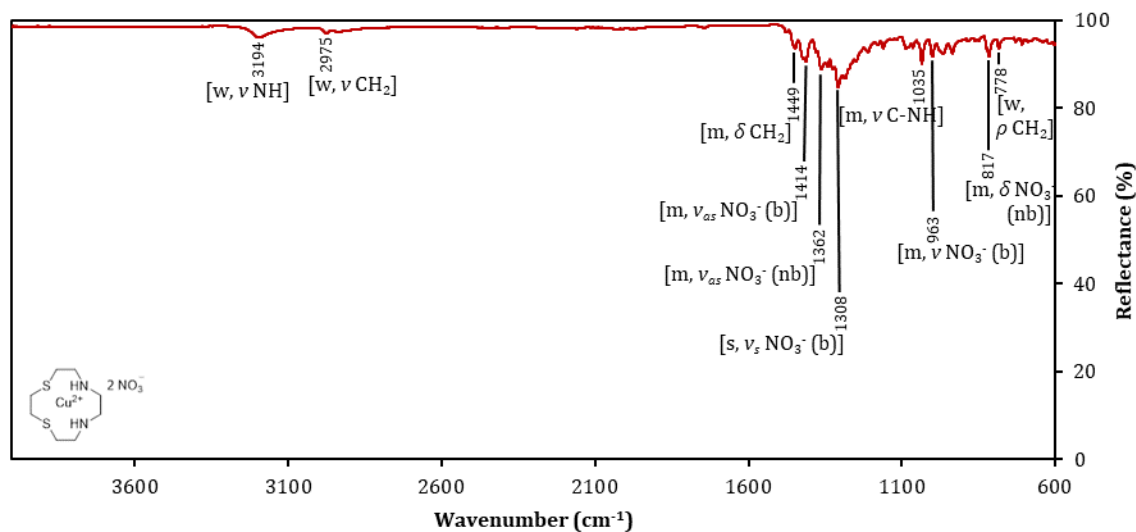

Figure S-2.2c IR spectrum of complex CuL<sup>3</sup>.

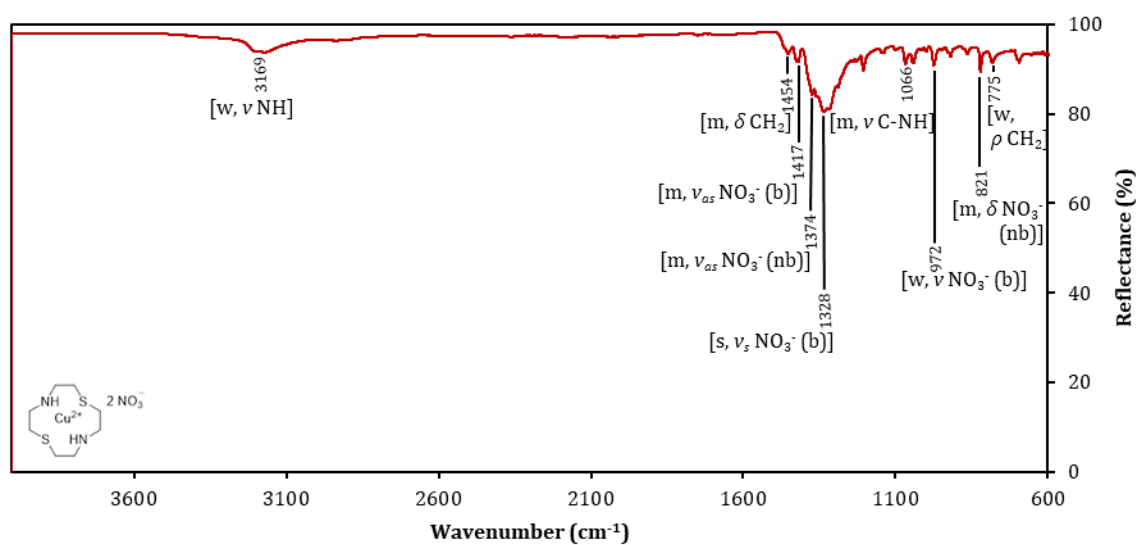

Figure S-2.2d IR spectrum of complex CuL<sup>4</sup>.

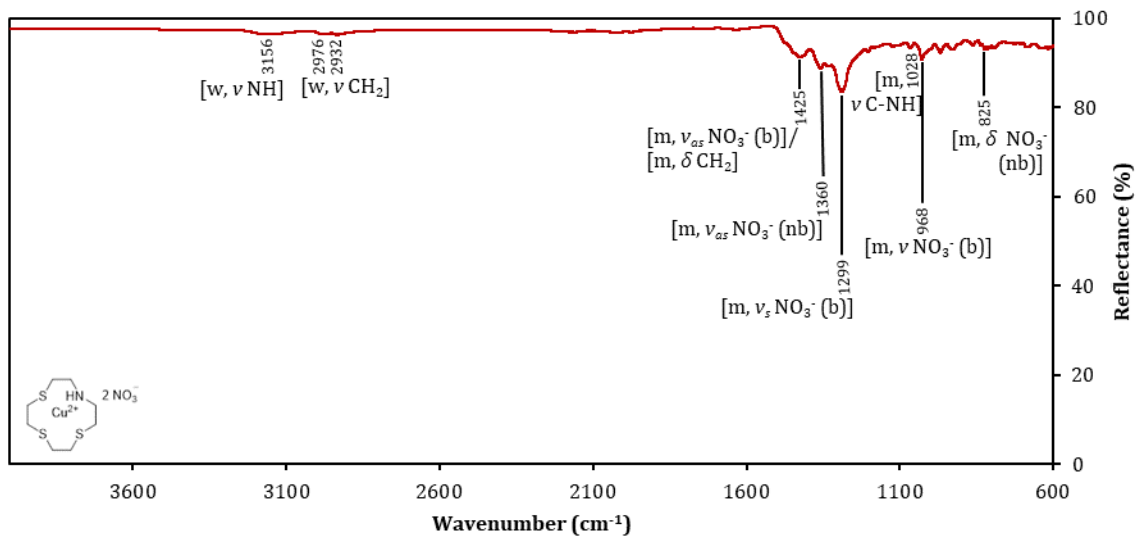

Figure S-2.2e IR spectrum of complex CuL<sup>5</sup>.

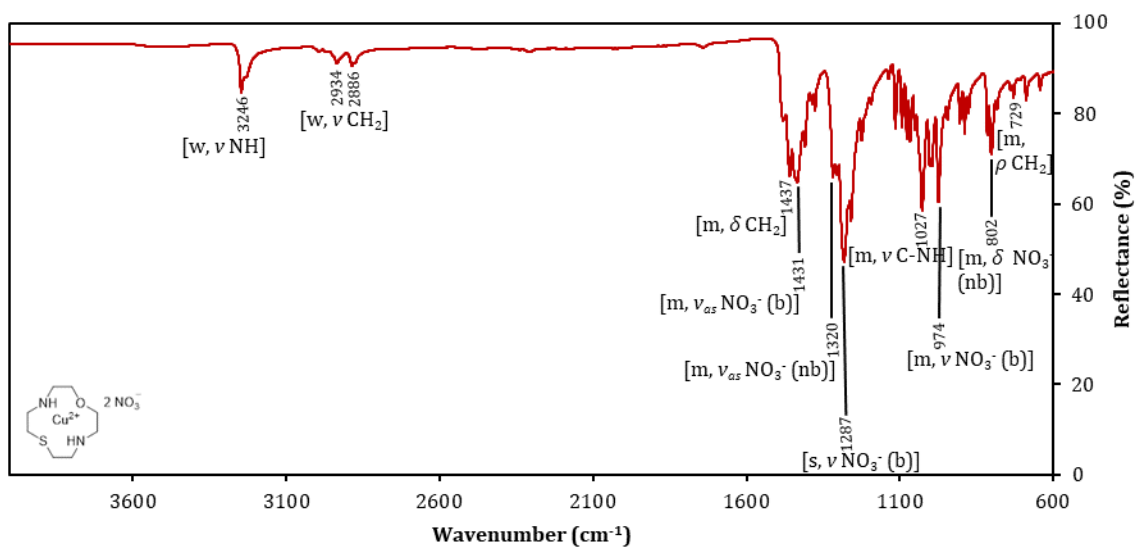

Figure S-2.2f IR spectrum of complex CuL<sup>6</sup>.



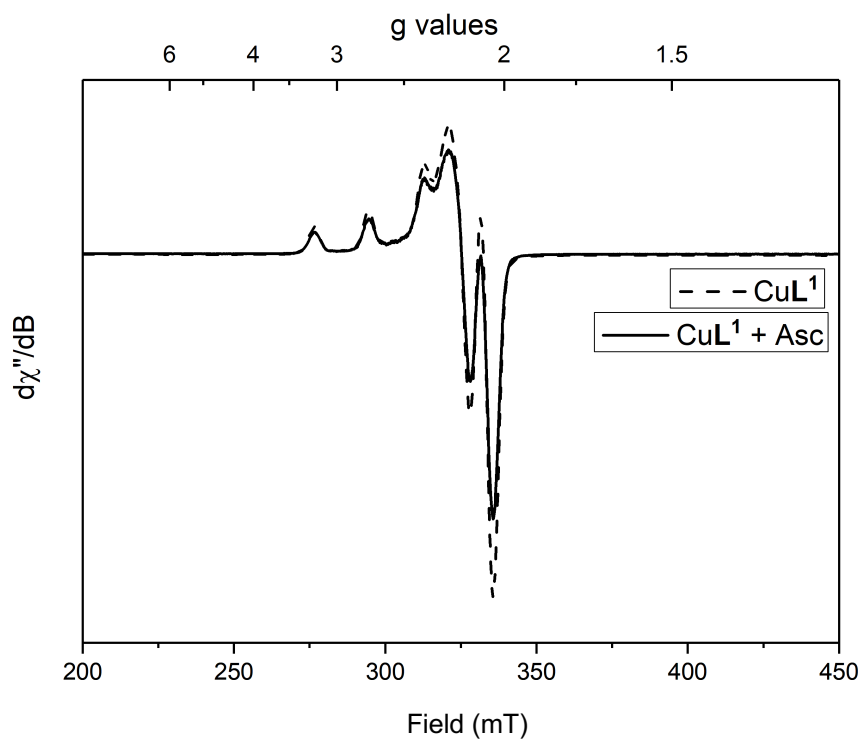

**Figure S-2.3a** Measured EPR spectra of complex CuL<sup>1</sup> (1 mM) in 50 mM Tris-HCl buffer (pH 7.4) before (dashed line) and after (solid line) addition of ascorbic acid (8 mM).

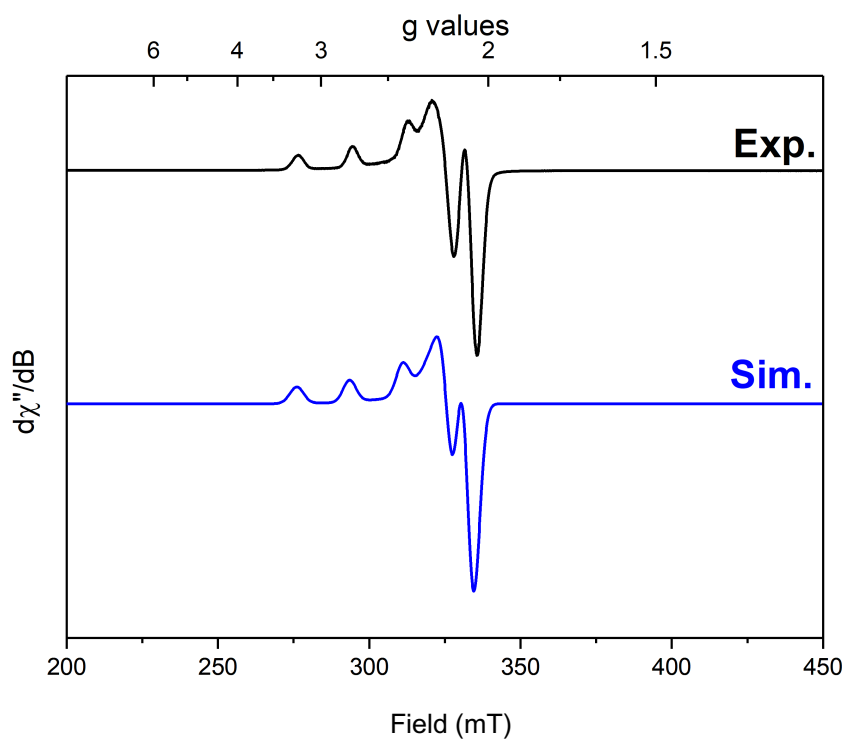

**Figure S-2.3b** Simulated EPR spectrum of complex CuL<sup>1</sup> (blue line) in comparison to the measured spectrum (black line). Simulated parameters:  $g = 2.21, 2.06, 2.03$ ,  $A = 528, 51, 2$  MHz.

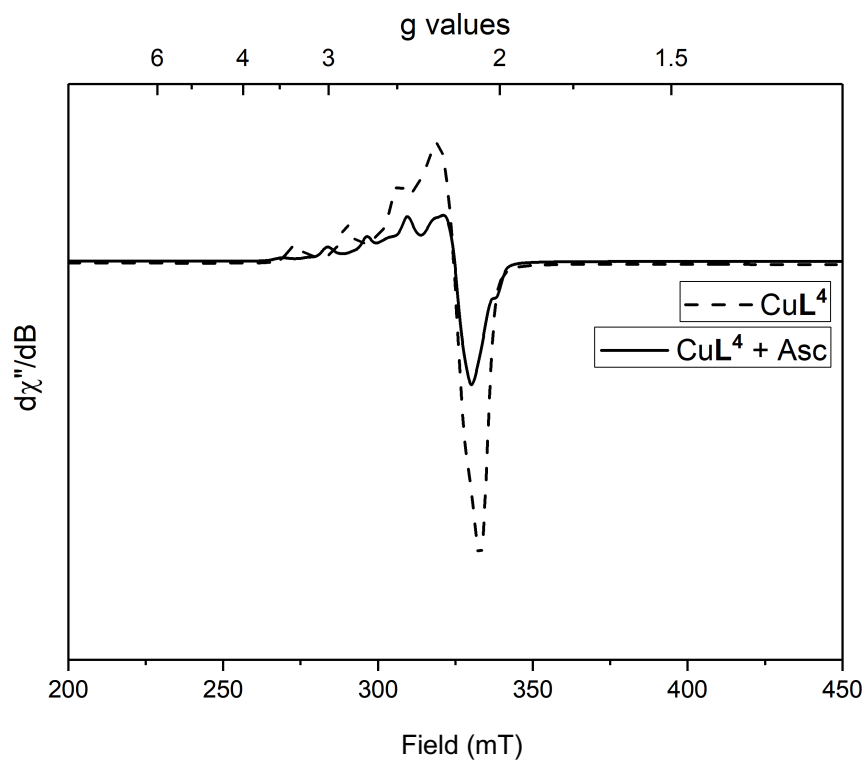

**Figure S-2.4a** Measured EPR spectra of complex  $\text{CuL}^4$  (1 mM) in 50 mM Tris-HCl buffer (pH 7.4) before (dashed line) and after (solid line) addition of ascorbic acid (8 mM).

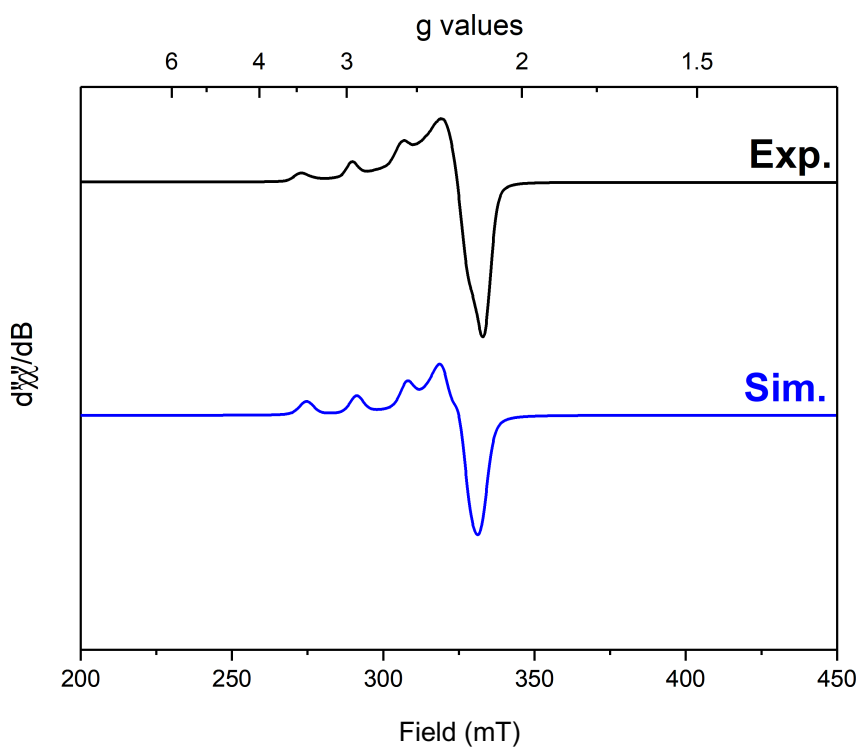

**Figure S-2.4b** Simulated EPR spectrum of complex  $\text{CuL}^4$  (blue) in comparison to the measured spectrum (black) in absence of ascorbic acid. Simulating parameters:  $g = 2.23, 2.09, 2.05$ ;  $A = 507, 31, 7$  MHz.

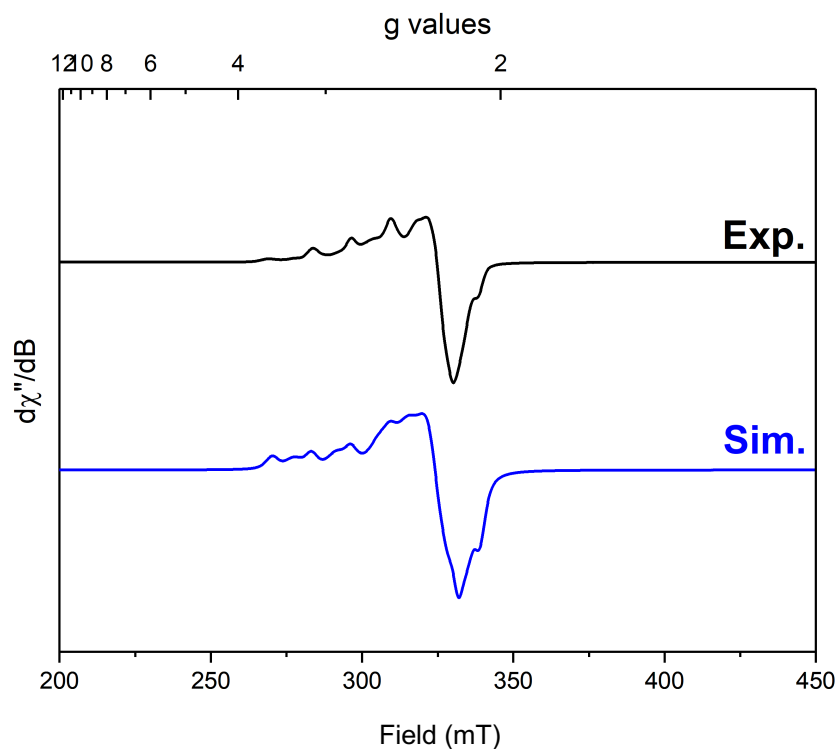

**Figure S-2.4c** Simulated EPR spectrum of complex  $\text{CuL}^4$  (blue) in comparison to the measured spectrum (black) in the presence of ascorbic acid.

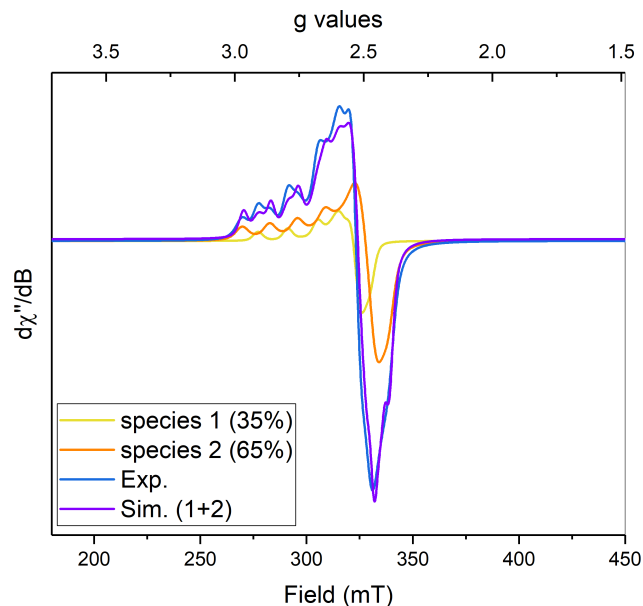

**Figure S-2.4d** Superimposition of the experimental EPR spectrum of complex  $\text{CuL}^4$  (blue) in the presence of ascorbate (8 mM), the overall simulated curve (purple) and the single components of the overall simulated curve, corresponding to two different species. Simulated parameters: species 1:  $g = 2.24, 2.11, 2.05$ ,  $A = 430, 30, 6$  MHz, 35% (yellow); species 2:  $g = 2.31, 2.04, 2.00$ ,  $A = 410, 50, 88$  MHz, 65% (orange).

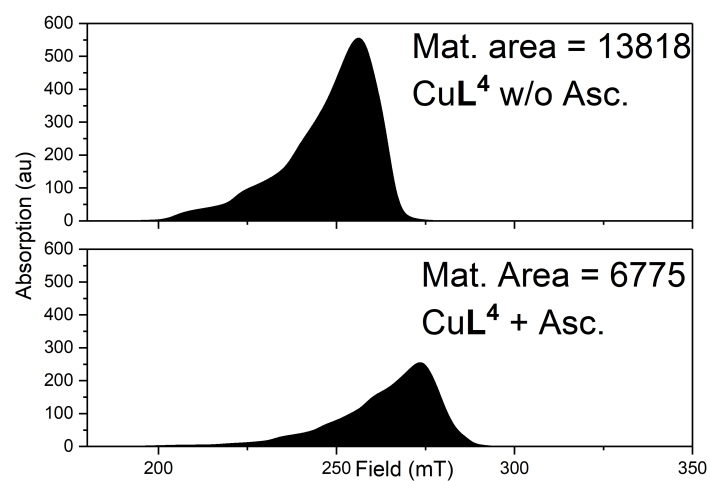

**Figure S-2.4e** Spin quantification of the EPR signal of CuL<sup>4</sup> (1 mM) before (top) and after (bottom) the addition of ascorbic acid. The halved spin quantity after addition of ascorbic acid suggests the formation of an EPR silent species under the experimental conditions (perpendicular mode) such as the dimeric species predicted by DFT calculations (see main text).

### S-3 X-ray crystallography

**Table S-3** Crystallographic data for complex CuL<sup>3</sup>.

|                                                      |                                                                               |
|------------------------------------------------------|-------------------------------------------------------------------------------|
| <b>Name</b>                                          | Cu([12]aneN <sub>2</sub> S <sub>2</sub> )                                     |
| <b>CCDC deposition number</b>                        | 1569176                                                                       |
| <b>Empirical formula</b>                             | C <sub>8</sub> H <sub>18</sub> CuN <sub>4</sub> O <sub>6</sub> S <sub>2</sub> |
| <b>M [g mol<sup>-1</sup>]</b>                        | 393.92                                                                        |
| <b>Appearance</b>                                    | darkblue needles                                                              |
| <b>Crystal system</b>                                | monoclinic                                                                    |
| <b>Space group</b>                                   | P2 <sub>1</sub> /n                                                            |
| <b>a [Å]</b>                                         | 9.1896(2)                                                                     |
| <b>b [Å]</b>                                         | 12.3669(3)                                                                    |
| <b>c [Å]</b>                                         | 12.9821(3)                                                                    |
| <b>α; β; γ [°]</b>                                   | 90; 100.1510(7); 90                                                           |
| <b>Volume [Å<sup>3</sup>]</b>                        | 1452.28(6)                                                                    |
| <b>Z</b>                                             | 4                                                                             |
| <b>Density [g cm<sup>-3</sup>]</b>                   | 1.802                                                                         |
| <b>Temperature [K]</b>                               | 99.93                                                                         |
| <b>θ range [°]</b>                                   | 4.584 – 56.636                                                                |
| <b>F(000)</b>                                        | 812.0                                                                         |
| <b>μ [mm<sup>-1</sup>]</b>                           | 1.824                                                                         |
| <b>Reflections collected</b>                         | 11688                                                                         |
| <b>Independent reflections</b>                       | 3568 (R <sub>int</sub> = 0.0184)                                              |
| <b>R<sub>1</sub> / wR<sub>2</sub> [all data]</b>     | 0.0244 / 0.0714                                                               |
| <b>R<sub>1</sub> / wR<sub>2</sub> [I &gt; 2σ(I)]</b> | 0.0223 / 0.0714                                                               |
| <b>goodness of fit</b>                               | 1.180                                                                         |

## S-4 Summary of stability constants

**Table S-4** Stability constants of complexes CuL<sup>1</sup>–CuL<sup>6</sup>.

| Complex                              | logK     | Method                            | T [°C] | Conditions                                               | Reference |
|--------------------------------------|----------|-----------------------------------|--------|----------------------------------------------------------|-----------|
| CuL <sup>1</sup> (Cu <sup>II</sup> ) | 23.3     | Potentiometry                     | 25     | H <sub>2</sub> O, 0.1 M NaNO <sub>3</sub>                | 10        |
| CuL <sup>2</sup> (Cu <sup>II</sup> ) | 18.0     | Potentiometry                     | 25     | H <sub>2</sub> O, 0.2 NaClO <sub>4</sub>                 | 11        |
| CuL <sup>2</sup> (Cu <sup>I</sup> )  | 17.5     | Calculation ( <i>vide infra</i> ) |        |                                                          |           |
| CuL <sup>3</sup> (Cu <sup>II</sup> ) | 14.0     | Potentiometry                     | 20     | H <sub>2</sub> O, 0.2 M Na <sub>2</sub> SO <sub>4</sub>  | 12        |
| CuL <sup>3</sup> (Cu <sup>I</sup> )  | 13.1     | Potentiometry                     | 20     | 2% v/v MeCN, 0.2 M Na <sub>2</sub> SO <sub>4</sub>       | 12        |
| CuL <sup>4</sup> (Cu <sup>II</sup> ) | 11.7     | Potentiometry                     | 20     | H <sub>2</sub> O, 0.2 M Na <sub>2</sub> SO <sub>4</sub>  | 12        |
| CuL <sup>4</sup> (Cu <sup>I</sup> )  | 12.3     | Potentiometry                     | 20     | 2% v/v MeCN, 0.2 M Na <sub>2</sub> SO <sub>4</sub>       | 12        |
| CuL <sup>5</sup> (Cu <sup>II</sup> ) | 7.9      | Potentiometry                     | 25     | H <sub>2</sub> O, 0.1 M NMe <sub>4</sub> NO <sub>3</sub> | 13        |
| CuL <sup>5</sup> (Cu <sup>I</sup> )  | 15.2     | Calculation ( <i>vide infra</i> ) |        |                                                          |           |
| CuL <sup>6</sup> (Cu <sup>II</sup> ) | 9.8      | Potentiometry                     | 25     | H <sub>2</sub> O, 0.1 M NMe <sub>4</sub> NO <sub>3</sub> | 13        |
| CuL <sup>6</sup> (Cu <sup>I</sup> )  | 13.5     | Calculation ( <i>vide infra</i> ) |        |                                                          |           |
| Cu <sup>II</sup> (tetrathiacyclen)   | 3.4      | Spectroscopy                      | 25     | H <sub>2</sub> O, 0.1 M HClO <sub>4</sub>                | 14        |
| Cu <sup>I</sup> (tetrathiacyclen)    | 12.9     | Calculation                       | 25     | H <sub>2</sub> O, 0.1 M HClO <sub>4</sub>                | 14        |
| Cu-Tris system                       | 5.3–6.3* | Potentiometry                     | 25     | H <sub>2</sub> O, 0.1 M KNO <sub>3</sub>                 | 15        |

\*For [Cu] = 100 μM and [Tris] = 0.01–0.1 M.<sup>15</sup>

For complexes CuL<sup>1</sup>, CuL<sup>2</sup>, CuL<sup>5</sup> and CuL<sup>6</sup>, no stability constants have been reported in the literature in the case of Cu(I). According to Osella *et al.*,<sup>16</sup> stability constants can be derived from electrochemical potentials by application of the Nernst equation:

$$E_{complex}^0 - E_{free}^0 = -0.059 \log \left( \frac{K_{ox}}{K_{red}} \right)$$

$$\rightarrow \log K_{red} = \log K_{ox} + \frac{E_{complex}^0 - E_{free}^0}{0.059}$$

Using the respective stability constants tabulated in Table S-4 for Cu(II), and the experimentally determined potentials (Table 2 in the manuscript and  $E_{1/2} = -0.57$  V for free Cu(II)<sup>1</sup> measured under the same conditions). For CuL<sup>1</sup>, no calculation could be carried out, because of the redox process being irreversible and  $E_{1/2}$  thus not being available.<sup>1</sup>

## S-5 Further DNA cleavage studies and ROS detection

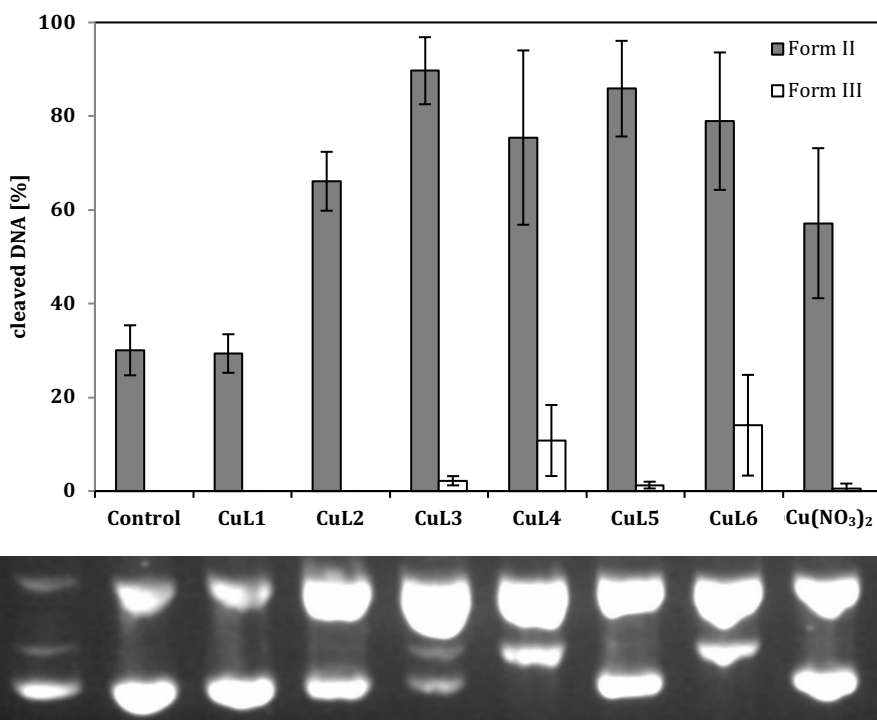

**Figure S-5.1** Cleavage activities of complexes CuL<sup>1</sup>–CuL<sup>6</sup> and Cu(NO<sub>3</sub>)<sub>2</sub> (0.04 mM) on pBR322 plasmid DNA (0.025 μg μL<sup>-1</sup>) in Tris-HCl buffer (50 mM, pH 7.4) and ascorbic acid (0.32 mM) at 37 °C for 2 h. Illustrated is the average of three experiments, the standard deviations are shown as error bars (top) and a representative agarose gel (bottom).

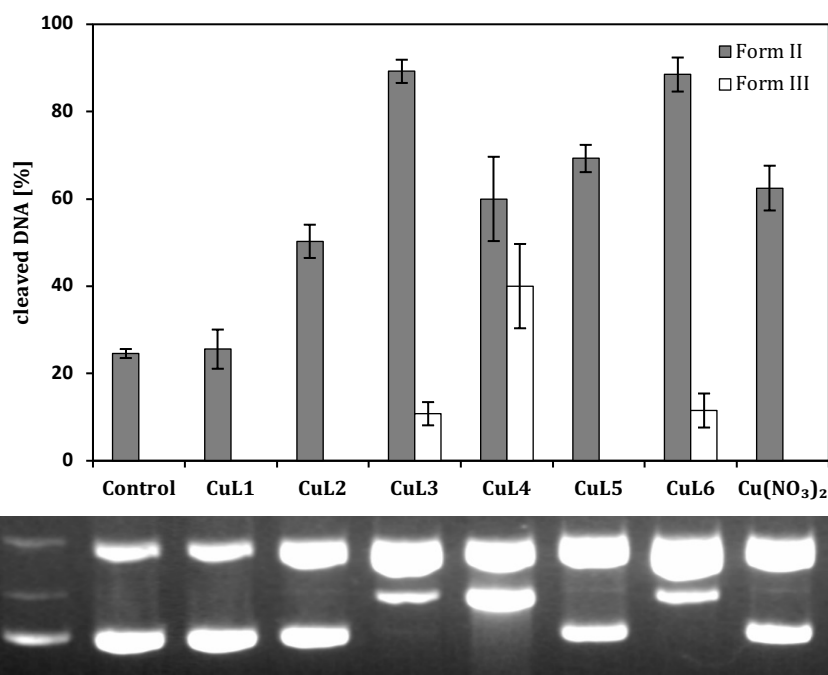

**Figure S-5.2** Cleavage activities of complexes CuL<sup>1</sup>–CuL<sup>6</sup> and Cu(NO<sub>3</sub>)<sub>2</sub> (0.04 mM) on pBR322 plasmid DNA (0.025 μg μL<sup>-1</sup>) in MOPS buffer (50 mM, pH 7.4) and ascorbic acid (0.32 mM) at 37 °C for 2 h. Illustrated is the average of three experiments, the standard deviations are shown as error bars (top) and a representative agarose gel (bottom).

**Table S-5** Quench assay for oxidative DNA cleavage: Summary of the quench experiments for CuL<sup>1</sup>–CuL<sup>6</sup> (0 no inhibition, + enhanced cleavage, - small inhibition, -- medium inhibition, --- strong inhibition).

|                  | ROS                   | CuL <sup>1</sup> | CuL <sup>2</sup> | CuL <sup>3</sup> | CuL <sup>4</sup> | CuL <sup>5</sup> | CuL <sup>6</sup> |
|------------------|-----------------------|------------------|------------------|------------------|------------------|------------------|------------------|
| DMSO             | $\cdot\text{OH}$      | 0                | --               | 0                | -                | ---              | 0                |
| NaN <sub>3</sub> | $^1\text{O}_2$        | 0                | -                | 0                | -                | --               | 0                |
| Pyruvate         | $\text{O}_2^{2-}$     | 0                | --               | --               | -                | ---              | -                |
| SOD              | $\text{O}_2^{\cdot-}$ | 0                | 0                | 0                | 0                | -                | (+)*             |

\* For complex CuL<sup>6</sup>, the cleavage activity seems enhanced in the presence of the superoxide scavenger SOD. This effect is not significant, however, when the error bars of this experiment are compared with the ones from the experiments for complexes CuL<sup>1</sup>-CuL<sup>5</sup>.

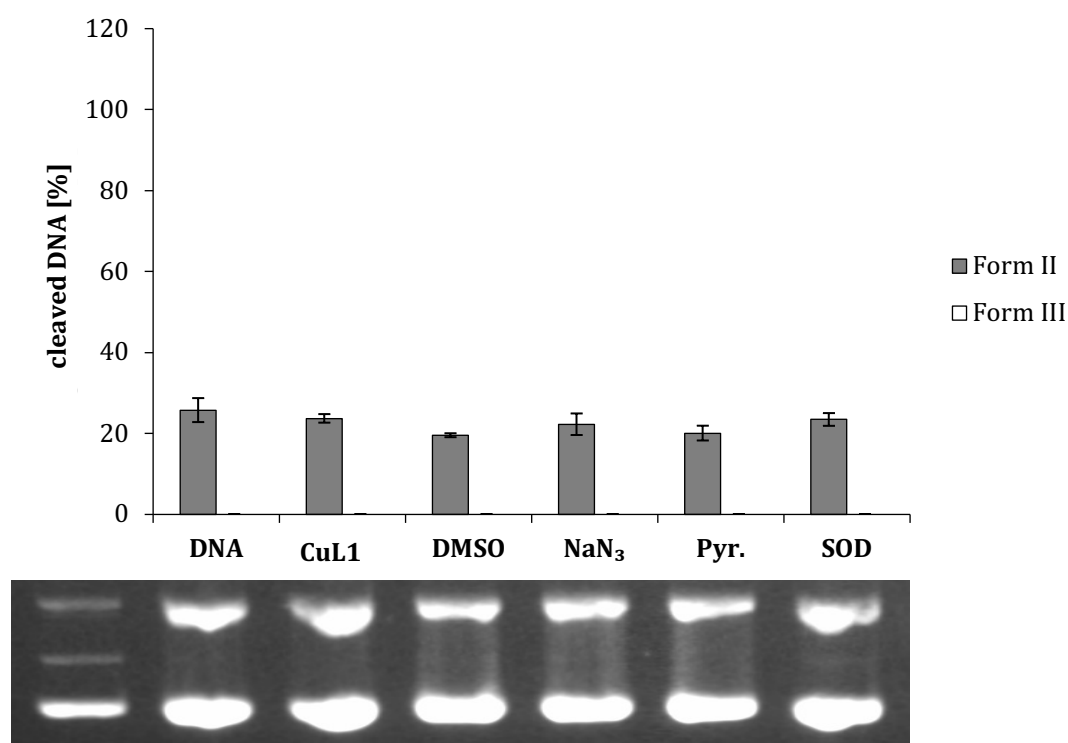

**Figure S-5.3** Cleavage activities of complex CuL<sup>1</sup> (0.04 mM) on pBR322 plasmid DNA (0.025  $\mu\text{g } \mu\text{L}^{-1}$ ) in TRIS-HCl buffer (50 mM, pH 7.4) and ascorbic acid (0.32 mM) at 37 °C for 2 h in the presence of the indicated ROS scavengers. Illustrated is the average of three experiments, the standard deviations are shown as error bars (top) and a representative agarose gel (bottom).



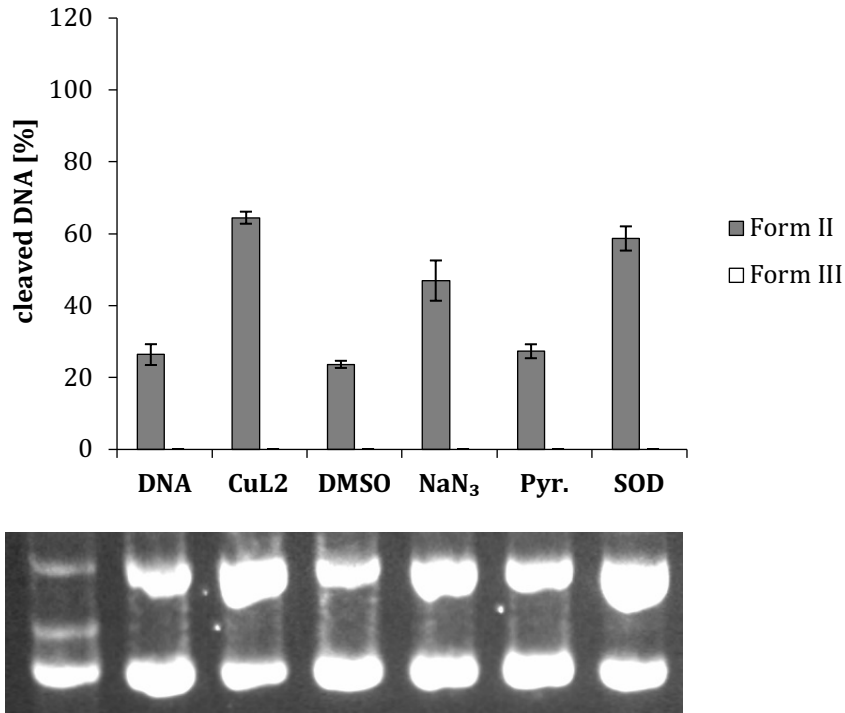

**Figure S-5.4** Cleavage activities of complex CuL<sup>2</sup> (0.04 mM) on pBR322 plasmid DNA (0.025  $\mu\text{g } \mu\text{L}^{-1}$ ) in TRIS-HCl buffer (50 mM, pH 7.4) and ascorbic acid (0.32 mM) at 37 °C for 2 h in the presence of the indicated ROS scavengers. Illustrated is the average of three experiments, the standard deviations are shown as error bars (top) and a representative agarose gel (bottom).

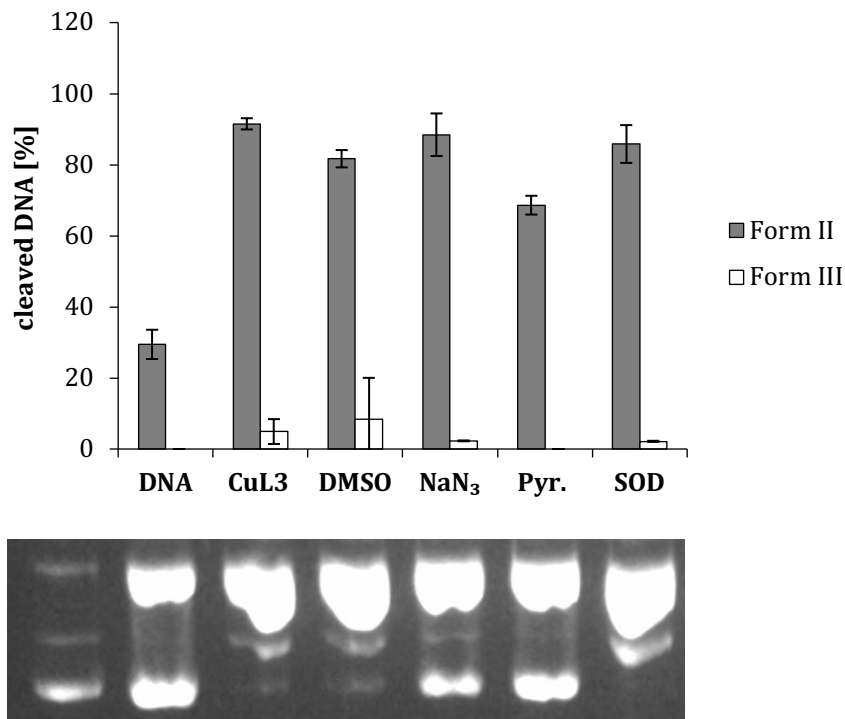

**Figure S-5.5** Cleavage activities of complex CuL<sup>3</sup> (0.04 mM) on pBR322 plasmid DNA (0.025  $\mu\text{g } \mu\text{L}^{-1}$ ) in TRIS-HCl buffer (50 mM, pH 7.4) and ascorbic acid (0.32 mM) at 37 °C for 2 h in the presence of the indicated ROS scavengers. Illustrated is the average of three experiments, the standard deviations are shown as error bars (top) and a representative agarose gel (bottom).

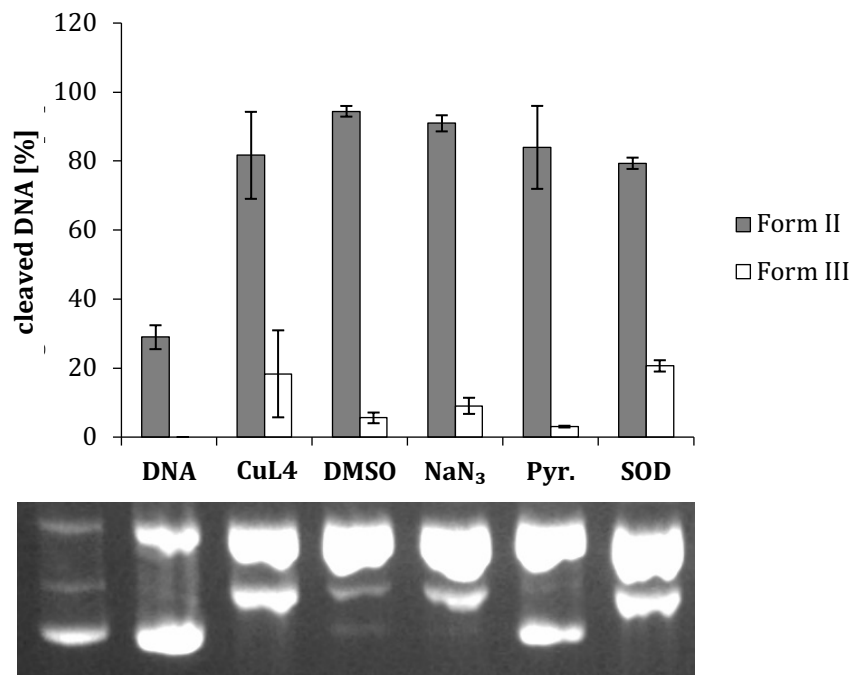

**Figure S-5.6** Cleavage activities of complex CuL<sup>4</sup> (0.04 mM) on pBR322 plasmid DNA (0.025  $\mu\text{g } \mu\text{L}^{-1}$ ) in TRIS-HCl buffer (50 mM, pH 7.4) and ascorbic acid (0.32 mM) at 37 °C for 2 h in the presence of the indicated ROS scavengers. Illustrated is the average of three experiments, the standard deviations are shown as error bars (top) and a representative agarose gel (bottom).

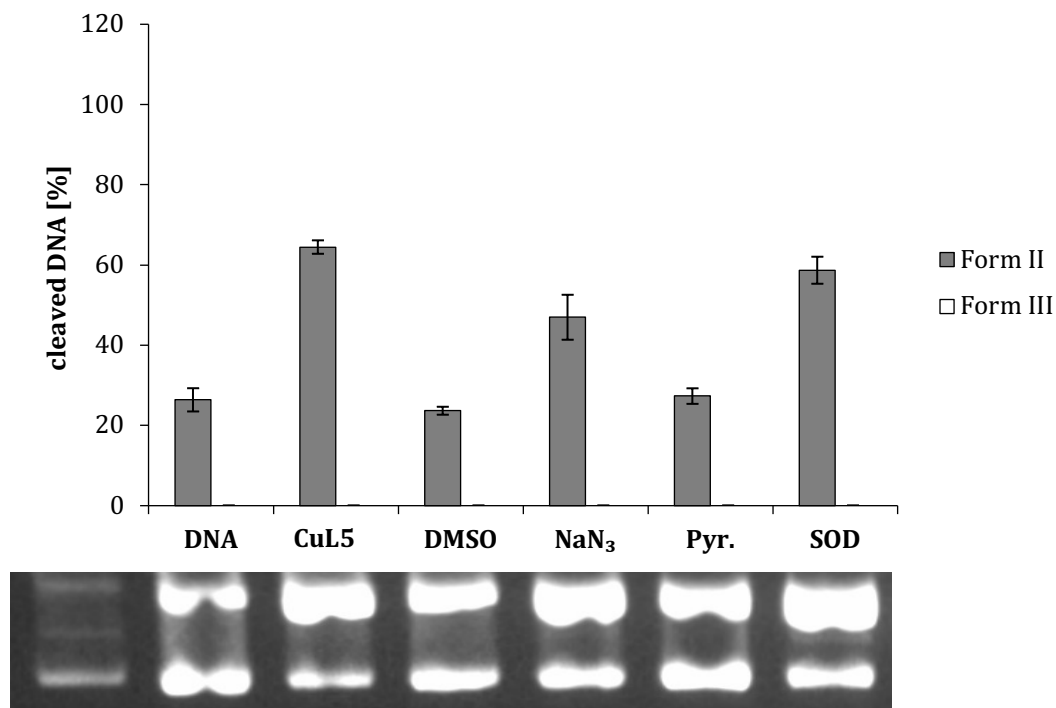

**Figure S-5.7** Cleavage activities of complex CuL<sup>5</sup> (0.04 mM) on pBR322 plasmid DNA (0.025  $\mu\text{g } \mu\text{L}^{-1}$ ) in TRIS-HCl buffer (50 mM, pH 7.4) and ascorbic acid (0.32 mM) at 37 °C for 2 h in the presence of the indicated ROS scavengers. Illustrated is the average of three experiments, the standard deviations are shown as error bars (top) and a representative agarose gel (bottom).

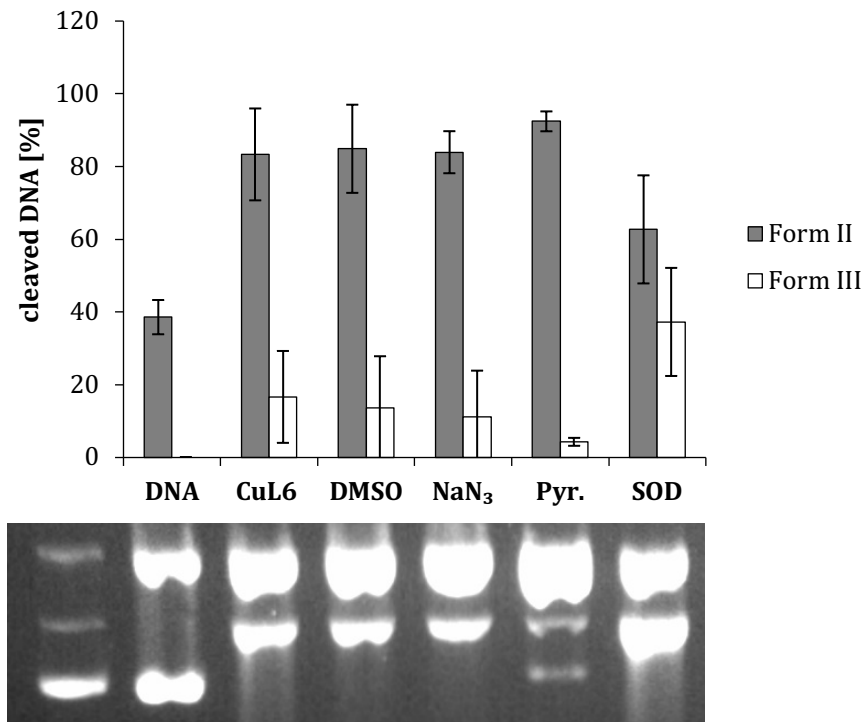

**Figure S-5.8** Cleavage activities of complex CuL<sup>6</sup> (0.04 mM) on pBR322 plasmid DNA (0.025  $\mu\text{g } \mu\text{L}^{-1}$ ) in TRIS-HCl buffer (50 mM, pH 7.4) and ascorbic acid (0.32 mM) at 37 °C for 2 h in the presence of the indicated ROS scavengers. Illustrated is the average of three experiments, the standard deviations are shown as error bars (top) and a representative agarose gel (bottom).

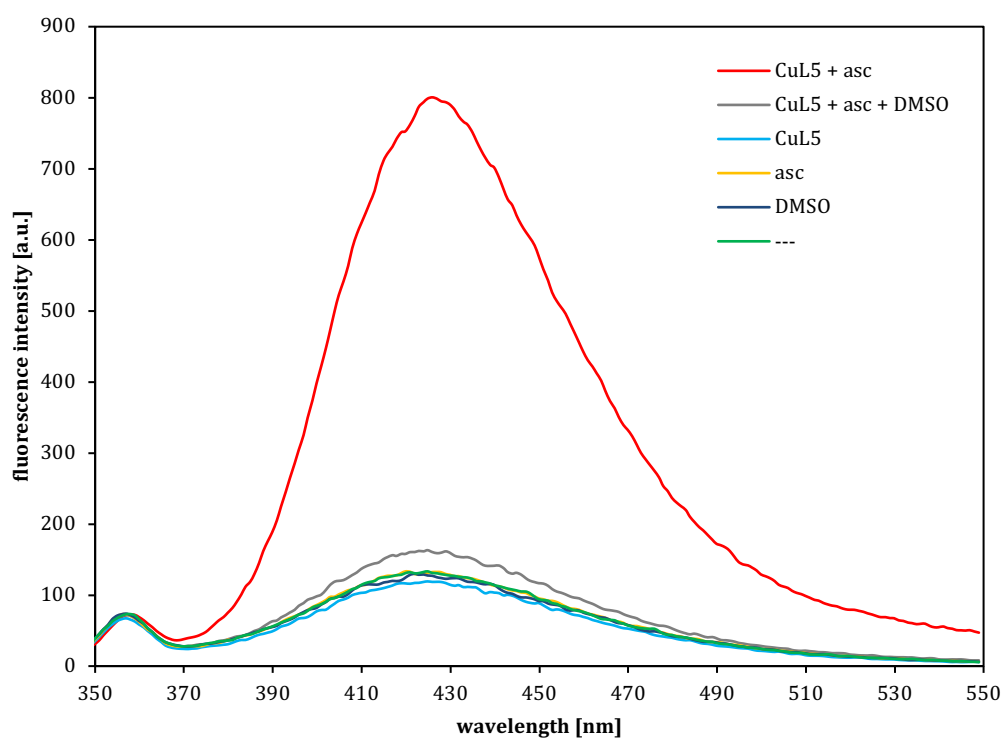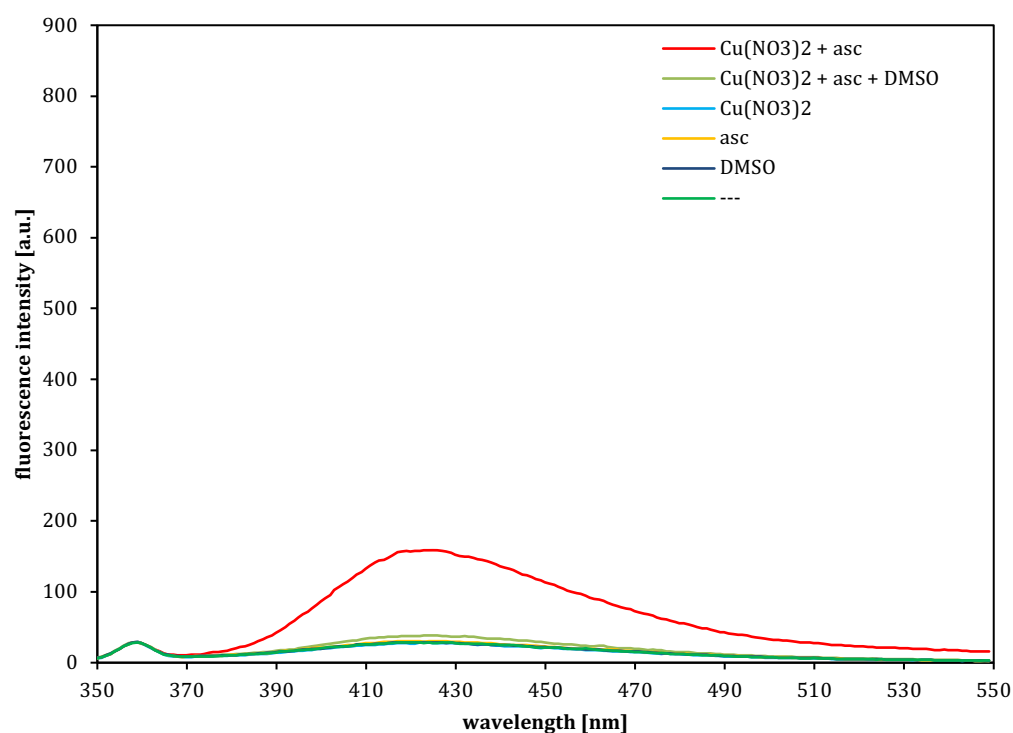

**Figure S-5.9** Fluorescence spectra ( $\lambda_{\text{ex}}=320$  nm) of TPA<sup>17</sup> (50  $\mu\text{M}$ ) in the presence of 40  $\mu\text{M}$  CuL<sup>5</sup> (top) and Cu(NO<sub>3</sub>)<sub>2</sub> (bottom), respectively, ascorbic acid as reducing agent (0.25 mM) and with (grey line) or without (red line) DMSO (200 mM) as a scavenger for hydroxyl radicals in Tris-HCl buffer (50 mM, pH 7.4) after incubation for 2.5 h at 37 °C. Activation of TPA just by interacting with the Cu(II) complex/salt can be excluded (blue line).

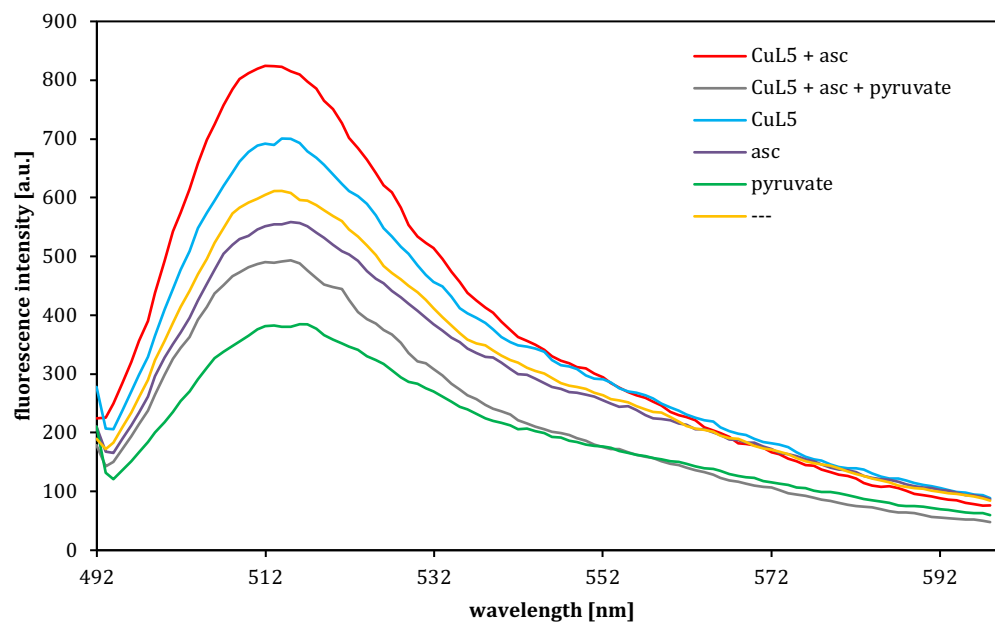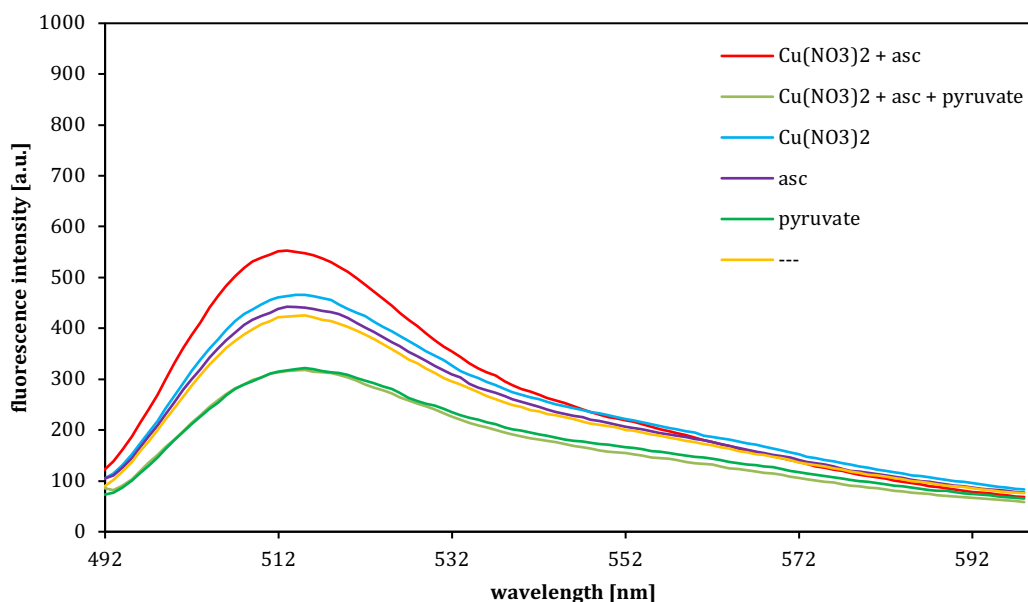

**Figure S-5.10a** Fluorescence spectra ( $\lambda_{ex}=485$  nm) of PBSF<sup>17</sup> (25  $\mu$ M) in the presence of 40  $\mu$ M CuL<sup>5</sup> (top) and Cu(NO<sub>3</sub>)<sub>2</sub> (bottom), respectively, ascorbic acid (0.25 mM) and with (grey line) or without (red line) pyruvate (2 mM) as a scavenger for hydrogen peroxide in **Tris-HCl buffer** (50 mM, pH 7.4) after incubation for 2.5 h at 37 °C. Activation of PBSF just by interacting with the Cu(II) complex/salt (background reaction, blue line) is possible, but the intensity is increased in the presence of the reducing agent, which initiates the generation of hydrogen peroxide.

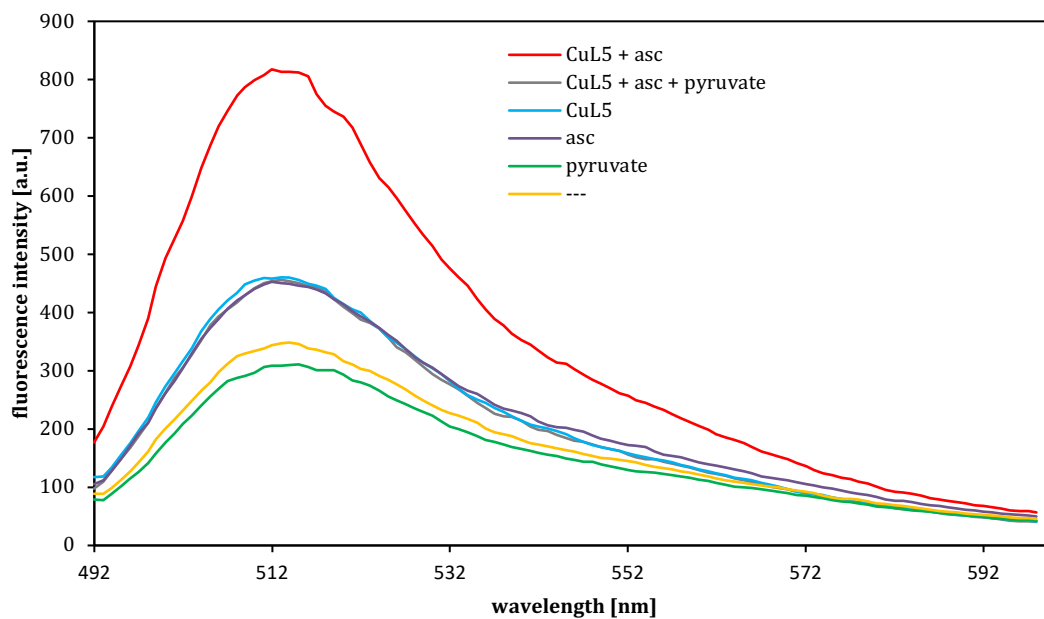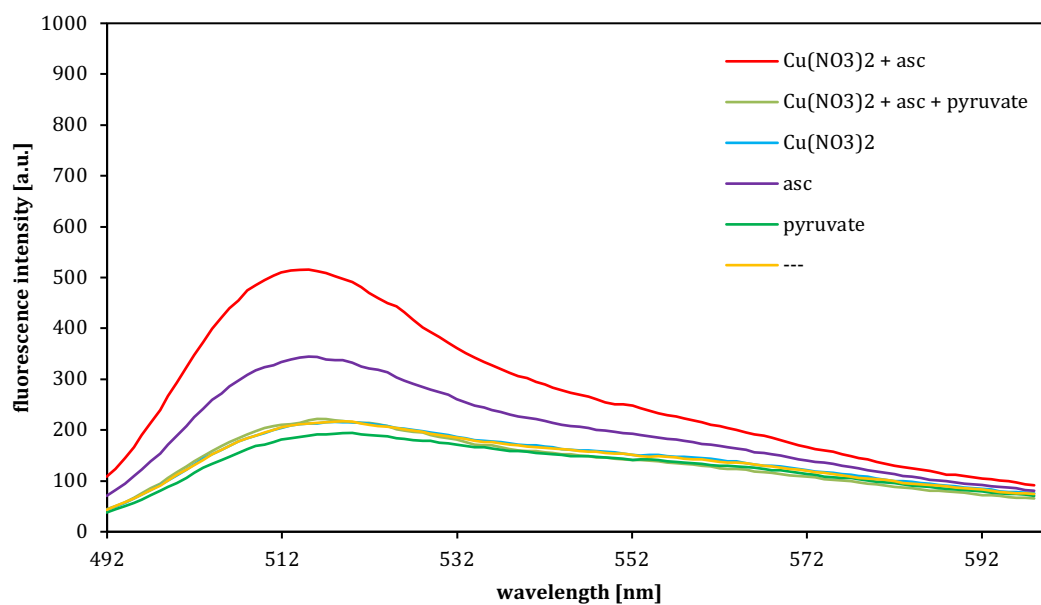

**Figure S-5.10b** Fluorescence spectra ( $\lambda_{\text{ex}}=485$  nm) of PBSF<sup>17</sup> (25 μM) in the presence of 40 μM CuL<sup>5</sup> (top) and Cu(NO<sub>3</sub>)<sub>2</sub> (bottom), respectively, ascorbic acid (0.25 mM) and with (grey line) or without (red line) pyruvate (2 mM) as a scavenger for hydrogen peroxide in **MOPS buffer** (50 mM, pH 7.4) after incubation for 2.5 h at 37 °C. Activation of PBSF just by interacting with the Cu(II) complex/salt (background reaction, blue line) is possible, but the intensity is significantly increased in the presence of the reducing agent, which initiates the generation of hydrogen peroxide.

## S-6 BNPP assay

BNPP (bis(4-nitrophenyl) phosphate) cleavage activity of the complexes was measured by UV/VIS spectroscopy. First BNPP (Sigma Aldrich, 0.08 mM) and Tris-HCl buffer (50 mM, pH 7.5, Fisher Scientific) were mixed with the complexes (0.4 mM) or with phosphodiesterase (*Crotalus atrox*, 0.05 U, Sigma). Deionized water (Millipore system) was added up to a total reaction volume of 1 mL before the samples were incubated for up to 8 d at 37 °C. After incubation, samples were analyzed by UV/VIS spectroscopy: 500  $\mu$ L of the incubation solution were diluted with 500  $\mu$ L of deionized water, the solution was filled in precision cells made of quartz (1 cm) and measured using a Varian Cary 100 spectrophotometer at 25 °C.

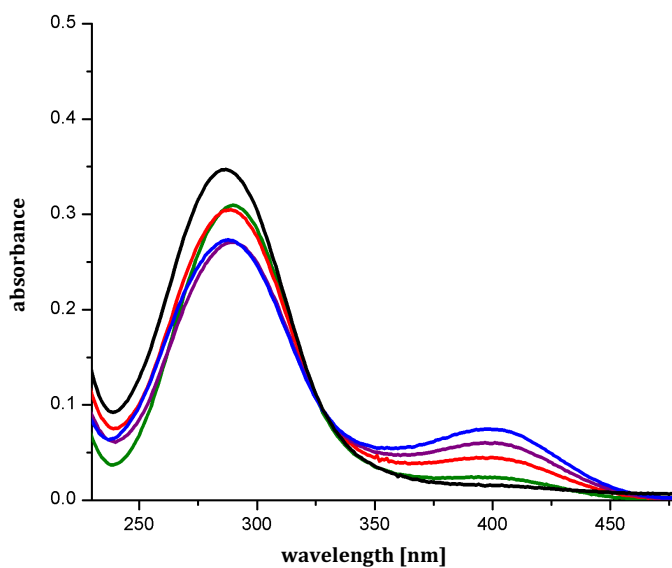

**Figure S-6.1** UV/VIS spectra of BNPP (0.08 mM) in the absence (black line) and presence of complex  $\text{CuL}^6$  (1 mM) in 50 mM Tris-HCl buffer (pH 7.5) after an incubation for 2 (green line), 4 (red line), 6 (purple line) and 8 d (blue line) at 37 °C. The absorbance of the complexes at the respective concentration were subtracted.

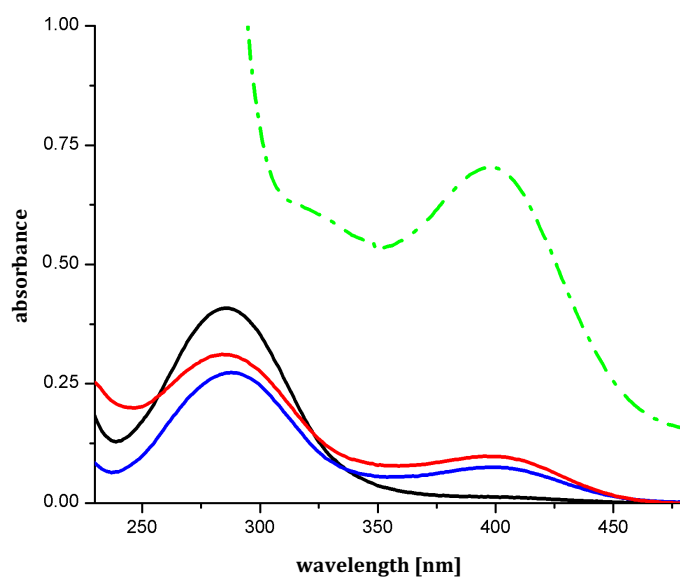

**Figure S-6.2** UV/VIS spectra of BNPP (0.08 mM) in the absence (black line) and presence of complex CuL<sup>6</sup> (0.4 mM – black line, 1 mM – blue line, 2 mM – red line) and phosphodiesterase (0.05 U – green line), respectively, in 50 mM Tris-HCl buffer (pH 7.5) after an incubation of 8 d (for phosphodiesterase only 2 d) at 37 °C. The absorbance of the complexes at the respective concentration were subtracted.

For comparison, the background spectra (no addition of BNPP) are given here:

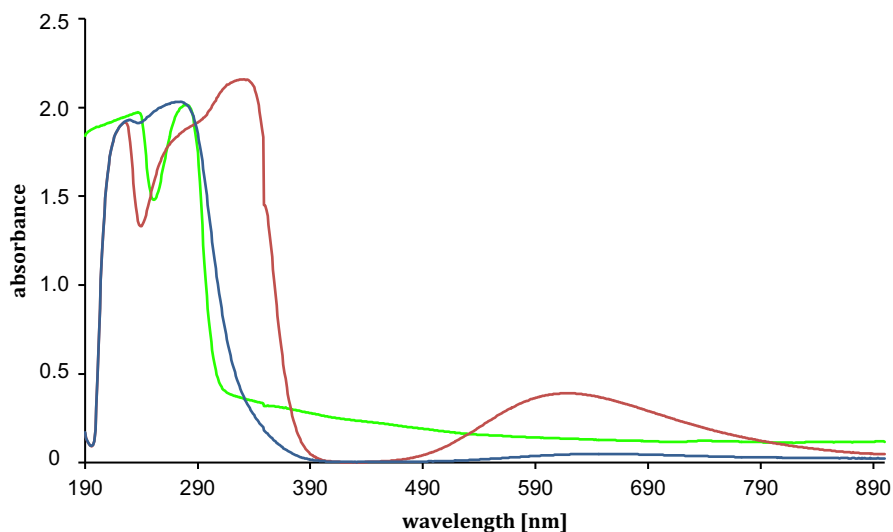

**Figure S-6.3** UV/VIS spectra of complexes CuL<sup>2</sup> and CuL<sup>6</sup> (1 mM – red and blue line, respectively) and phosphodiesterase (0.05 U – green line) in Tris-HCl buffer (pH 7.5, 50 mM).



### S-7 Computational studies: Intrinsic reaction coordinates, structural parameters and cartesian coordinates of optimized structures

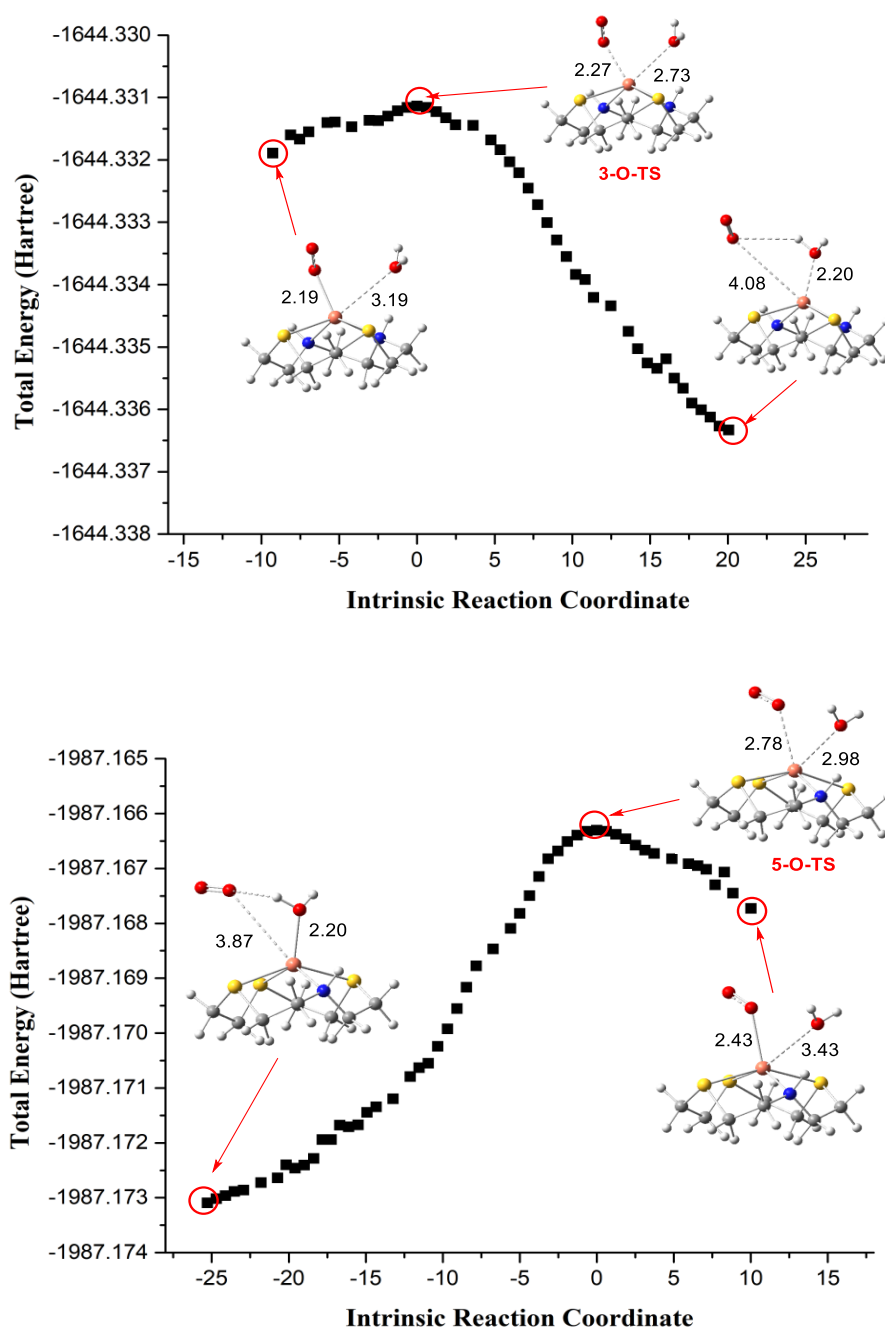

Figure S-7 Intrinsic reaction coordinates for n-O-TS (n=3 top, n=5 bottom).

**Table S-7.1** Structural parameters of optimized stationary structures in the generation of ROS mediated by Cu(I)L<sup>n</sup> complexes.

| Structural parameters | B(Cu-01) <sup>a</sup> | B(02-03) <sup>b</sup> | B(Cu-02) | B(Cu-03) | A(03-02-Cu) <sup>c</sup> | A(01-Cu-02) | B(Cu-N1) | B(Cu-N2) | B(Cu-N3) | B(Cu-N4) |
|-----------------------|-----------------------|-----------------------|----------|----------|--------------------------|-------------|----------|----------|----------|----------|
| <b>1-0-RC</b>         | 2.21                  | 1.21                  | 4.42     | 5.63     | 171.54                   | 42.83       | 2.26     | 2.28     | 2.26     | 2.28     |
| <b>1-0-TS1</b>        | 2.18                  | 1.23                  | 2.93     | 3.63     | 115.48                   | 70.82       | 2.27     | 2.28     | 2.22     | 2.42     |
| <b>1-0-IM</b>         | 2.21                  | 1.27                  | 2.14     | 2.96     | 118.21                   | 81.74       | 2.23     | 2.28     | 2.27     | 2.42     |
| <b>1-0-TS2</b>        | 2.43                  | 1.27                  | 2.06     | 2.78     | 111.04                   | 81.57       | 2.19     | 2.26     | 2.34     | 2.34     |
| <b>1-0-PC</b>         | 4.09                  | 1.24                  | 2.03     | 2.88     | 120.78                   | 73.05       | 2.19     | 2.26     | 2.24     | 2.27     |
| Structural parameters | B(Cu-01)              | B(02-03)              | B(Cu-02) | B(Cu-03) | A(03-02-Cu)              | A(01-Cu-02) | B(Cu-S1) | B(Cu-N2) | B(Cu-N3) | B(Cu-N4) |
| <b>2-0-RC</b>         | 2.20                  | 1.21                  | 4.64     | 5.82     | 165.13                   | 37.43       | 2.55     | 2.27     | 2.28     | 2.26     |
| <b>2-0-TS1</b>        | 2.19                  | 1.23                  | 2.76     | 3.51     | 117.90                   | 74.19       | 2.69     | 2.27     | 2.26     | 2.23     |
| <b>2-0-IM</b>         | 2.19                  | 1.26                  | 2.16     | 2.97     | 118.18                   | 82.67       | 2.79     | 2.24     | 2.28     | 2.26     |
| <b>2-0-TS2</b>        | 2.70                  | 1.26                  | 2.05     | 2.75     | 109.87                   | 79.52       | 2.58     | 2.18     | 2.25     | 2.35     |
| <b>2-0-PC</b>         | 3.80                  | 1.26                  | 2.03     | 2.56     | 99.53                    | 87.22       | 2.59     | 2.15     | 2.26     | 2.27     |
| Structural parameters | B(Cu-01)              | B(02-03)              | B(Cu-02) | B(Cu-03) | A(03-02-Cu)              | A(01-Cu-02) | B(Cu-S1) | B(Cu-S2) | B(Cu-N3) | B(Cu-N4) |
| <b>3-0-RC</b>         | 2.20                  | 1.21                  | 4.47     | 5.66     | 166.86                   | 41.11       | 2.60     | 2.50     | 2.27     | 2.29     |
| <b>3-0-TS</b>         | 2.73                  | 1.23                  | 2.27     | 2.73     | 119.39                   | 74.18       | 2.58     | 2.56     | 2.24     | 2.28     |
| <b>3-0-PC</b>         | 4.13                  | 1.23                  | 2.13     | 2.99     | 123.61                   | 68.53       | 2.57     | 2.52     | 2.20     | 2.27     |
| Structural parameters | B(Cu-01)              | B(02-03)              | B(Cu-02) | B(Cu-03) | A(03-02-Cu)              | A(01-Cu-02) | B(Cu-S1) | B(Cu-N2) | B(Cu-S3) | B(Cu-N4) |
| <b>4-0-RC</b>         | 2.20                  | 1.21                  | 4.72     | 5.54     | 127.13                   | 34.98       | 2.58     | 2.25     | 2.56     | 2.25     |
| <b>4-0-TS1</b>        | 2.30                  | 1.23                  | 2.47     | 3.33     | 124.41                   | 72.61       | 2.59     | 2.25     | 2.63     | 2.24     |
| <b>4-0-IM</b>         | 2.44                  | 1.24                  | 2.19     | 3.07     | 124.63                   | 75.17       | 2.60     | 2.22     | 2.62     | 2.28     |
| <b>4-0-TS2</b>        | 2.85                  | 1.24                  | 2.13     | 3.00     | 123.90                   | 74.36       | 2.56     | 2.22     | 2.55     | 2.30     |
| <b>4-0-PC</b>         | 4.08                  | 1.23                  | 2.15     | 3.02     | 123.91                   | 69.27       | 2.55     | 2.21     | 2.53     | 2.24     |
| Structural parameters | B(Cu-01)              | B(02-03)              | B(Cu-02) | B(Cu-03) | A(03-02-Cu)              | A(01-Cu-02) | B(Cu-S1) | B(Cu-S2) | B(Cu-S3) | B(Cu-N4) |
| <b>5-0-RC</b>         | 2.18                  | 1.21                  | 4.58     | 5.73     | 158.35                   | 38.28       | 2.63     | 2.48     | 2.59     | 2.25     |
| <b>5-0-TS</b>         | 2.98                  | 1.22                  | 2.78     | 3.67     | 129.36                   | 66.62       | 2.57     | 2.48     | 2.56     | 2.19     |
| <b>5-0-PC</b>         | 4.11                  | 1.23                  | 2.20     | 3.06     | 124.41                   | 68.97       | 2.64     | 2.54     | 2.60     | 2.20     |
| Structural parameters | B(Cu-01)              | B(02-03)              | B(Cu-02) | B(Cu-03) | A(03-02-Cu)              | A(01-Cu-02) | B(Cu-S1) | B(Cu-N2) | B(Cu-03) | B(Cu-N4) |
| <b>6-0-RC</b>         | 2.17                  | 1.21                  | 4.64     | 5.07     | 103.98                   | 59.12       | 2.45     | 2.19     | 2.55     | 2.20     |
| <b>6-0-TS1</b>        | 2.17                  | 1.23                  | 2.51     | 3.30     | 119.23                   | 76.75       | 2.61     | 2.52     | 2.26     | 2.14     |
| <b>6-0-IM</b>         | 2.17                  | 1.25                  | 2.27     | 3.08     | 119.41                   | 80.38       | 2.64     | 2.52     | 2.26     | 2.15     |
| <b>6-0-TS2</b>        | 2.80                  | 1.24                  | 2.09     | 2.86     | 115.55                   | 75.75       | 2.55     | 2.48     | 2.16     | 2.22     |
| <b>6-0-PC</b>         | 4.07                  | 1.23                  | 2.09     | 2.91     | 120.01                   | 70.76       | 2.51     | 2.43     | 2.14     | 2.17     |

<sup>a</sup>Bond length (in Å), and O1 is the oxygen atom in the water molecule. <sup>b</sup>O2 and O3 are the oxygen atoms in the O<sub>2</sub> molecule, O2 is closer to the metal center and O3 is farther away from the metal center. <sup>c</sup>Bond angle (in degrees).

**Table S-7.2 Cartesian coordinates of optimized structures****[Cu<sup>I</sup>L<sup>1</sup>(H<sub>2</sub>O)]<sup>+</sup>**

H 1.550349 -2.295331 0.722034  
H -2.347406 -1.574548 0.689913  
H -1.550111 2.295123 0.723669  
Cu 0.000195 -0.000204 0.944028  
C 1.267973 1.904961 -1.013815  
H 2.016313 2.614974 -1.398360  
H 0.958258 1.288327 -1.864005  
C 0.063958 2.691278 -0.474321  
H 0.388505 3.317941 0.364754  
H -0.300265 3.370378 -1.260784  
C -1.904879 1.264590 -1.007986  
H -1.296141 0.961799 -1.866358  
H -2.607703 2.027730 -1.376456  
C -2.705389 0.062462 -0.485563  
H -3.338558 0.386210 0.349060  
H -3.379297 -0.288445 -1.282676  
C -1.268474 -1.904506 -1.014061  
H -0.959143 -1.287502 -1.864125  
H -2.016999 -2.614345 -1.398567  
C -0.064212 -2.691054 -0.475458  
H -0.388370 -3.318068 0.363506  
H 0.299643 -3.369826 -1.262375  
C 1.904397 -1.264145 -1.009402  
H 1.295292 -0.961002 -1.867392  
H 2.607071 -2.027125 -1.378492  
C 2.705133 -0.062236 -0.486816  
H 3.378696 0.289008 -1.284073  
H 3.338665 -0.386343 0.347391  
N -0.999419 1.797121 0.026629  
N -1.827515 -1.012556 0.018498  
N 0.999383 -1.797101 0.025373  
O 0.001502 -0.001674 3.171423  
H -0.684265 -0.364811 3.754376  
H 0.686449 0.363539 3.754043  
N 1.827490 1.012575 0.018101  
H 2.347701 1.574279 0.689509

**[Cu<sup>I</sup>L<sup>1</sup>(OH)]**

H -1.616093 2.117070 0.990508  
H 2.340809 1.720706 0.651085  
H 1.382243 -1.748443 0.646446  
Cu -0.074816 0.125150 1.254456  
C -1.292516 -1.880543 -1.164486  
H -1.976107 -2.648561 -1.573679  
H -1.081261 -1.182670 -1.983871  
C 0.028047 -2.542330 -0.720822  
H -0.180868 -3.211810 0.122250  
H 0.399424 -3.175858 -1.547790  
C 1.934813 -1.021363 -1.239400  
H 1.380312 -0.703222 -2.135274  
H 2.687946 -1.753381 -1.599251  
C 2.710506 0.172072 -0.649883  
H 3.344917 -0.199180 0.163123  
H 3.383035 0.570613 -1.433092  
C 1.111233 2.071843 -0.958590  
H 0.758935 1.475717 -1.807291  
H 1.723756 2.888104 -1.386979

C -0.090901 2.704509 -0.237815  
H 0.269027 3.256812 0.638106  
H -0.576276 3.431353 -0.910489  
C -1.985548 1.226899 -0.810303  
H -1.384590 0.993690 -1.694256  
H -2.687755 2.025121 -1.103061  
C -2.774794 -0.023501 -0.393599  
H -3.490186 -0.257844 -1.204899  
H -3.371776 0.206528 0.497968  
N 1.000221 -1.562002 -0.282254  
N 1.845651 1.195655 -0.063394  
N -1.061488 1.694315 0.247286  
O 0.748061 -1.119186 2.451252  
H 0.721530 -0.929184 3.398389  
N -1.884156 -1.124261 -0.064545  
H -2.267718 -1.734774 0.649330

[Cu<sup>I</sup>L<sup>2</sup>(H<sub>2</sub>O)]<sup>+</sup>

H -0.078971 2.718388 0.757892  
H 2.961256 0.121642 0.710328  
H 0.373670 -2.726577 0.484533  
Cu 0.144097 -0.036115 0.860101  
S -2.315152 0.049912 0.148775  
C -1.988164 -1.122439 -1.241068  
H -2.943258 -1.441480 -1.668870  
H -1.429109 -0.598811 -2.022883  
C -1.217840 -2.353769 -0.742428  
H -1.788790 -2.836969 0.057682  
H -1.153700 -3.076981 -1.570311  
C 1.188067 -1.941683 -1.217214  
H 0.834680 -1.302291 -2.033629  
H 1.413924 -2.923916 -1.660606  
C 2.473983 -1.364576 -0.610782  
H 2.828224 -2.032585 0.183271  
H 3.256114 -1.342794 -1.384958  
C 2.276845 1.093512 -0.953797  
H 1.754069 0.783127 -1.864062  
H 3.301394 1.358090 -1.256148  
C 1.595461 2.331306 -0.356238  
H 2.133131 2.638355 0.548278  
H 1.666479 3.163269 -1.073528  
C -0.774364 2.135854 -1.071061  
H -0.415205 1.498804 -1.885933  
H -0.841562 3.158596 -1.477388  
C -2.183439 1.703920 -0.648190  
H -2.859352 1.747115 -1.507935  
H -2.587026 2.390578 0.105260  
N 0.117437 -2.023358 -0.206976  
N 2.252984 -0.035348 -0.004354  
N 0.196298 2.055307 0.034621  
O 0.048212 -0.417564 3.040507  
H 0.683872 -0.146677 3.722528  
H -0.822235 -0.428601 3.470725

[Cu<sup>I</sup>L<sup>2</sup>(OH)]

H 0.076933 2.654991 0.764642  
H 3.069212 -0.174719 0.323800  
H 0.229350 -2.061044 0.561392  
Cu 0.452665 0.196332 1.248633  
S -2.666019 0.240694 0.348317

C -2.454527 -1.024210 -0.981611  
H -3.444297 -1.430318 -1.221353  
H -2.078702 -0.526205 -1.882204  
C -1.510437 -2.166913 -0.558293  
H -1.888023 -2.603322 0.373759  
H -1.581443 -2.959127 -1.328052  
C 0.795328 -1.875813 -1.438223  
H 0.475064 -1.232291 -2.274263  
H 0.840282 -2.903798 -1.852983  
C 2.223710 -1.504183 -1.002306  
H 2.555812 -2.237432 -0.259431  
H 2.890594 -1.598737 -1.879130  
C 2.282558 0.998764 -1.183368  
H 1.678607 0.785798 -2.071866  
H 3.275595 1.308411 -1.556917  
C 1.679277 2.189462 -0.415309  
H 2.314981 2.425793 0.445008  
H 1.663613 3.072383 -1.076313  
C -0.696325 1.885080 -0.961956  
H -0.471351 1.037205 -1.612991  
H -0.604303 2.800062 -1.574101  
C -2.145368 1.791508 -0.481860  
H -2.798552 1.978977 -1.342362  
H -2.359948 2.580140 0.250718  
N -0.141683 -1.741890 -0.340832  
N 2.316091 -0.194522 -0.356095  
N 0.318059 1.905160 0.115816  
O 0.834598 -1.335136 2.302400  
H 0.516255 -1.323821 3.215357

[Cu<sup>I</sup>L<sup>3</sup>(H<sub>2</sub>O)]<sup>+</sup>

H -2.823338 0.859751 0.623194  
H 0.533378 2.821811 0.478288  
Cu -0.090654 0.209990 0.874098  
S 2.250488 -0.612186 0.129432  
C 2.267651 0.581037 -1.277268  
H 3.264899 0.590804 -1.727161  
H 1.555927 0.251337 -2.040774  
C 1.922008 1.989069 -0.771390  
H 2.622436 2.269815 0.022507  
H 2.074049 2.700409 -1.597507  
C -0.489280 2.358604 -1.229351  
H -0.340443 1.670783 -2.068529  
H -0.406295 3.377046 -1.638880  
C -1.891055 2.176719 -0.635562  
H -2.029446 2.889565 0.185692  
H -2.640163 2.421007 -1.404138  
C -2.444486 -0.200871 -1.079427  
H -1.734454 -0.128202 -1.909360  
H -3.445319 -0.021473 -1.505083  
C -2.422740 -1.617633 -0.494845  
H -3.182322 -1.725860 0.288024  
H -2.661396 -2.350888 -1.271619  
C 0.295465 -2.334795 -1.088110  
H 0.051731 -1.608892 -1.869524  
H 0.142434 -3.338563 -1.499441  
C 1.760966 -2.202832 -0.654965  
H 2.411214 -2.384967 -1.516976  
H 2.010037 -2.959745 0.096216  
N 0.553223 2.082490 -0.223032

N -2.087178 0.820834 -0.080464  
O 0.145438 0.759896 2.999278  
H -0.538964 0.558512 3.658264  
H 0.986997 0.495662 3.406304  
S -0.852924 -2.098804 0.336656

[Cu<sup>I</sup>L<sup>3</sup>(OH)]

H 3.084400 -0.101596 0.069256  
H 0.335163 -2.279005 0.445299  
Cu 0.603778 -0.085916 1.225053  
S -2.760224 0.018276 0.428599  
C -2.467421 -1.184055 -0.943145  
H -3.430674 -1.629128 -1.217514  
H -2.098787 -0.637775 -1.818299  
C -1.480849 -2.296745 -0.544507  
H -1.813404 -2.740875 0.400595  
H -1.552731 -3.093397 -1.310095  
C 0.739929 -1.855997 -1.544053  
H 0.320516 -1.183711 -2.308358  
H 0.794711 -2.855908 -2.019172  
C 2.179369 -1.439258 -1.199487  
H 2.588726 -2.170532 -0.494953  
H 2.787551 -1.483935 -2.120684  
C 2.146466 1.059051 -1.352379  
H 1.405861 0.865776 -2.135398  
H 3.084360 1.325924 -1.874406  
C 1.716489 2.281057 -0.520794  
H 2.484871 2.528761 0.220044  
H 1.585569 3.158518 -1.164612  
C -1.053027 1.917289 -0.882771  
H -0.732292 1.137736 -1.578668  
H -1.047237 2.877401 -1.414345  
C -2.473176 1.635454 -0.387397  
H -3.157994 1.739764 -1.237828  
H -2.775165 2.380227 0.357555  
N -0.113609 -1.836085 -0.366970  
N 2.265927 -0.135186 -0.532038  
O 1.224837 -1.684443 2.076039  
H 1.140349 -1.754076 3.036417  
S 0.183665 2.043039 0.482063

[Cu<sup>I</sup>L<sup>4</sup>(H<sub>2</sub>O)]<sup>+</sup>

H -0.020368 -2.678403 0.747007  
H -0.641103 2.698000 0.398038  
Cu -0.368702 0.030039 0.847587  
S 2.161092 -0.001055 0.538892  
C 2.067205 1.202610 -0.858450  
H 3.075457 1.563464 -1.082224  
H 1.690822 0.688600 -1.748322  
C 1.173504 2.393278 -0.486345  
H 1.558471 2.862077 0.425428  
H 1.246672 3.143261 -1.289013  
C -1.068602 1.927923 -1.442867  
H -0.615258 1.198131 -2.122258  
H -1.095984 2.889182 -1.982118  
C -2.513351 1.530366 -1.122557  
H -2.998425 2.303312 -0.514783  
H -3.092461 1.446414 -2.047252  
C -2.265540 -1.336864 -1.330944  
H -1.651248 -0.906109 -2.127835

H -3.178179 -1.730440 -1.788170  
C -1.525954 -2.474794 -0.615740  
H -2.151814 -2.857496 0.197437  
H -1.388623 -3.300355 -1.331065  
C 0.895100 -2.074884 -0.972544  
H 0.649324 -1.420152 -1.815557  
H 1.051968 -3.083226 -1.389620  
C 2.206674 -1.628896 -0.318518  
H 3.011580 -1.624374 -1.059943  
H 2.504736 -2.334169 0.466248  
N -0.231414 2.010238 -0.233431  
N -0.236440 -2.052133 -0.028076  
O -0.688202 0.301959 3.015036  
H -1.533362 0.177505 3.476457  
H 0.004721 0.290112 3.695066  
S -2.721536 -0.007928 -0.134137

[Cu<sup>I</sup>L<sup>4</sup>(OH)]

H 0.115272 -1.997400 0.520829  
H -0.492130 2.615633 0.868227  
Cu -0.165664 0.215234 1.363275  
S 2.573546 -0.129425 -0.011205  
C 2.052930 1.345937 -0.977723  
H 2.947121 1.860151 -1.346628  
H 1.486701 1.022881 -1.855437  
C 1.252163 2.352548 -0.138647  
H 1.786045 2.559404 0.794348  
H 1.197368 3.296531 -0.707787  
C -1.010096 1.874274 -0.960624  
H -0.685371 1.046218 -1.594929  
H -0.887263 2.803640 -1.543922  
C -2.494996 1.715553 -0.636687  
H -2.829196 2.513635 0.038750  
H -3.061903 1.836468 -1.567409  
C -2.622601 -1.121596 -1.073235  
H -2.261777 -0.624880 -1.981330  
H -3.566368 -1.617210 -1.328150  
C -1.612884 -2.170738 -0.573789  
H -1.963834 -2.568073 0.384019  
H -1.620286 -3.008872 -1.297358  
C 0.651435 -1.745868 -1.482146  
H 0.379112 -1.006562 -2.252899  
H 0.600741 -2.730850 -1.991074  
C 2.120624 -1.558648 -1.081003  
H 2.741122 -1.553524 -1.984164  
H 2.444290 -2.410958 -0.471830  
N -0.121427 1.912991 0.225692  
N -0.268154 -1.653121 -0.365689  
O -0.136794 -1.367482 2.390133  
H 0.229577 -1.301211 3.282152  
S -2.998383 0.164594 0.198497

[Cu<sup>I</sup>L<sup>5</sup>(H<sub>2</sub>O)]<sup>+</sup>

H 0.239719 -2.792311 0.519169  
Cu 0.016617 -0.162200 0.947384  
S -2.509442 -0.036134 0.212832  
C -2.203783 -1.243512 -1.148519  
H -3.165487 -1.582461 -1.544841  
H -1.663310 -0.744548 -1.959225  
C -1.419032 -2.449974 -0.619578

H -1.948701 -2.880562 0.236838  
H -1.398145 -3.221583 -1.404178  
C 0.943225 -2.095755 -1.265208  
H 0.617770 -1.368966 -2.017125  
H 0.990709 -3.074145 -1.770548  
C 2.352709 -1.757373 -0.771228  
H 2.718083 -2.533474 -0.088523  
H 3.047270 -1.728475 -1.616509  
C 2.273487 1.092052 -1.096014  
H 1.625015 0.698064 -1.884334  
H 3.246707 1.319702 -1.544175  
C 1.693867 2.381473 -0.502964  
H 2.353368 2.780822 0.274612  
H 1.623174 3.146452 -1.283525  
C -1.098885 2.089021 -1.110957  
H -0.667993 1.421671 -1.863815  
H -1.220251 3.079579 -1.562983  
C -2.473577 1.588493 -0.651794  
H -3.150158 1.543613 -1.511459  
H -2.916504 2.286951 0.065908  
N -0.050563 -2.103686 -0.175319  
O -0.074356 -0.720102 3.064243  
H 0.653119 -0.482050 3.662236  
H -0.893986 -0.543817 3.554798  
S 0.055465 2.229714 0.319484  
S 2.507852 -0.202092 0.197841

[Cu<sup>I</sup>L<sup>5</sup>(OH)]

H 0.748426 -2.125604 0.464667  
Cu 0.139687 -0.036244 1.399081  
S -2.821473 -0.519179 0.175526  
C -2.138521 -1.662986 -1.105931  
H -2.949003 -2.328400 -1.423591  
H -1.840277 -1.073988 -1.980148  
C -0.964899 -2.507055 -0.582232  
H -1.245098 -2.955348 0.376402  
H -0.811487 -3.338143 -1.297589  
C 1.143244 -1.618852 -1.512819  
H 0.687211 -0.934051 -2.244001  
H 1.281502 -2.578704 -2.051597  
C 2.552803 -1.133927 -1.148088  
H 3.055226 -1.894095 -0.538564  
H 3.141630 -1.012993 -2.064185  
C 1.953427 1.693287 -1.132145  
H 1.338715 1.236620 -1.912480  
H 2.740278 2.269362 -1.634024  
C 1.127523 2.667993 -0.280517  
H 1.726855 3.055664 0.549813  
H 0.823553 3.527283 -0.890709  
C -1.394953 1.664337 -0.996035  
H -0.844542 0.972103 -1.639005  
H -1.506601 2.617446 -1.528438  
C -2.780873 1.103091 -0.676976  
H -3.352458 1.041479 -1.611023  
H -3.326025 1.782026 -0.011868  
N 0.266257 -1.756031 -0.362527  
O 0.593995 -1.620903 2.335127  
H 0.769959 -1.566566 3.283487  
S -0.394312 1.999396 0.518680  
S 2.717153 0.375028 -0.107217



[Cu<sup>I</sup>L<sup>6</sup>(H<sub>2</sub>O)]<sup>+</sup>

H 0.081844 -2.637045 0.785534  
H -0.495481 2.612279 0.501343  
Cu 0.002310 0.030283 0.932436  
S 2.376124 -0.013449 0.385349  
C 2.130402 1.194867 -0.996855  
H 3.108773 1.578430 -1.300903  
H 1.696539 0.669724 -1.853361  
C 1.240924 2.364541 -0.550822  
H 1.692992 2.849874 0.320474  
H 1.220248 3.110142 -1.360208  
C -1.071319 1.853218 -1.305088  
H -0.616872 1.226158 -2.079494  
H -1.255938 2.838746 -1.762133  
C -2.413211 1.261494 -0.863001  
H -2.872203 1.894601 -0.095835  
H -3.102095 1.222551 -1.717707  
C -2.156839 -1.119585 -1.174700  
H -1.562334 -0.826102 -2.050431  
H -3.150923 -1.421166 -1.533318  
C -1.506241 -2.291450 -0.447492  
H -2.116489 -2.544962 0.425393  
H -1.504612 -3.165482 -1.116865  
C 0.910163 -2.063896 -0.987493  
H 0.621027 -1.420828 -1.824663  
H 0.993833 -3.086956 -1.388539  
C 2.288753 -1.652304 -0.457559  
H 3.022980 -1.679654 -1.268612  
H 2.635911 -2.356112 0.307915  
N -0.126257 1.942603 -0.173183  
N -0.143366 -1.974561 0.043271  
O -1.222892 0.409055 2.669086  
H -2.139898 0.104831 2.569615  
H -0.976165 0.263562 3.596550  
O -2.278926 -0.028210 -0.263277

[Cu<sup>I</sup>L<sup>6</sup>(OH)]

H 0.090210 -2.091887 0.544033  
H -0.466010 2.566240 0.893602  
Cu -0.104414 0.178238 1.320484  
S 2.577682 -0.114105 -0.030856  
C 2.016693 1.316659 -1.041040  
H 2.893867 1.826966 -1.453776  
H 1.430241 0.954986 -1.890328  
C 1.225165 2.342298 -0.214343  
H 1.783618 2.585780 0.695247  
H 1.140013 3.267435 -0.809892  
C -1.080163 1.901725 -0.933169  
H -0.686348 1.232545 -1.701832  
H -1.130676 2.911549 -1.375727  
C -2.498733 1.462823 -0.560879  
H -2.879964 2.070258 0.269057  
H -3.151781 1.646341 -1.430679  
C -2.469657 -0.887104 -1.126321  
H -2.010020 -0.481169 -2.039252  
H -3.475436 -1.246366 -1.393466  
C -1.635485 -2.043055 -0.571822  
H -2.067096 -2.341259 0.388654  
H -1.729395 -2.901042 -1.265516

C 0.673504 -1.805511 -1.437364  
H 0.396096 -1.089971 -2.227077  
H 0.628172 -2.806033 -1.917025  
C 2.140028 -1.593889 -1.038011  
H 2.765913 -1.627157 -1.936788  
H 2.465358 -2.414871 -0.387932  
N -0.128651 1.891688 0.204743  
N -0.246742 -1.673491 -0.327382  
O -0.142063 -1.356767 2.411169  
H 0.045067 -1.236880 3.351542  
O -2.590073 0.124301 -0.125797

[Cu<sup>II</sup>L<sup>I</sup>(H<sub>2</sub>O)]<sup>2+</sup>

H 1.462013 -2.171631 0.812438  
H -2.188753 -1.485978 0.788105  
H -1.461857 2.171558 0.813774  
Cu 0.000034 -0.000043 0.589084  
C 1.287480 1.942596 -1.004990  
H 2.089685 2.639194 -1.276690  
H 1.024421 1.382566 -1.908356  
C 0.078194 2.706417 -0.459500  
H 0.377272 3.328602 0.390365  
H -0.330588 3.376053 -1.225154  
C -1.957232 1.296757 -0.989090  
H -1.412575 1.047176 -1.905620  
H -2.658664 2.102105 -1.238409  
C -2.714749 0.080526 -0.451201  
H -3.332600 0.370960 0.404798  
H -3.387562 -0.322655 -1.217110  
C -1.288000 -1.942131 -1.005190  
H -1.025296 -1.381782 -1.908459  
H -2.090320 -2.638632 -1.276805  
C -0.078512 -2.706128 -0.460412  
H -0.377277 -3.328543 0.389396  
H 0.329948 -3.375566 -1.226412  
C 1.956732 -1.296271 -0.990332  
H 1.411753 -1.046304 -1.906564  
H 2.658051 -2.101542 -1.240216  
C 2.714468 -0.080258 -0.452246  
H 3.386987 0.323230 -1.218250  
H 3.332632 -0.371028 0.403412  
N -0.961807 1.747886 0.030163  
N -1.753232 -0.963695 0.025975  
N 0.961683 -1.747750 0.029120  
O 0.001402 -0.001329 2.859096  
H -0.676765 -0.369975 3.451709  
H 0.679862 0.367411 3.451312  
N 1.753108 0.963808 0.025669  
H 2.188889 1.485865 0.787811

[Cu<sup>II</sup>L<sup>I</sup>(OH)]<sup>+</sup>

H -1.579964 2.079441 0.967232  
H 2.216304 1.642948 0.781876  
H 1.541990 -2.077712 0.498324  
Cu 0.000812 0.050692 0.949655  
C -1.274421 -1.834842 -1.136599  
H -2.032455 -2.551090 -1.485670  
H -1.089819 -1.140479 -1.963941  
C 0.022091 -2.579871 -0.790125  
H -0.181973 -3.310641 -0.000351

H 0.359239 -3.144133 -1.672239  
C 1.965557 -1.033730 -1.226507  
H 1.393530 -0.685236 -2.094791  
H 2.731686 -1.724038 -1.613827  
C 2.680396 0.142616 -0.539579  
H 3.303018 -0.241374 0.275718  
H 3.348198 0.641289 -1.255598  
C 1.131142 2.061038 -0.909074  
H 0.847304 1.495526 -1.801994  
H 1.855770 2.822874 -1.228076  
C -0.100840 2.731781 -0.301386  
H 0.192710 3.330790 0.567870  
H -0.560993 3.414385 -1.027517  
C -2.062259 1.248627 -0.835898  
H -1.528410 1.046212 -1.769563  
H -2.800737 2.033359 -1.046780  
C -2.762021 -0.017708 -0.327476  
H -3.482840 -0.365159 -1.081741  
H -3.330467 0.215530 0.580287  
N 1.044048 -1.658071 -0.282962  
N 1.725812 1.111906 0.062408  
N -1.067595 1.703917 0.167614  
O 0.338052 -0.960836 2.459859  
H 1.024512 -0.666633 3.080300  
N -1.762424 -1.047937 0.016059  
H -2.131335 -1.675399 0.729665

[Cu<sup>II</sup>L<sup>2</sup>(H<sub>2</sub>O)]<sup>2+</sup>

H -0.146667 2.599648 0.777758  
H 2.772074 0.227133 0.814066  
H 0.419096 -2.592911 0.767532  
Cu 0.155091 -0.003470 0.611953  
S -2.214296 -0.012374 0.246153  
C -2.003904 -1.285521 -1.089896  
H -2.996300 -1.629495 -1.395428  
H -1.515956 -0.830809 -1.957242  
C -1.192048 -2.444887 -0.507053  
H -1.724640 -2.886274 0.340690  
H -1.081828 -3.230238 -1.265133  
C 1.241820 -2.042787 -1.038776  
H 0.885431 -1.529403 -1.938020  
H 1.470170 -3.077363 -1.322808  
C 2.488848 -1.362624 -0.473021  
H 2.879704 -1.938723 0.372073  
H 3.279612 -1.317213 -1.230953  
C 2.238298 1.109806 -0.966296  
H 1.767904 0.767071 -1.893535  
H 3.283610 1.345067 -1.200242  
C 1.525736 2.342393 -0.408665  
H 2.046808 2.708533 0.481894  
H 1.526716 3.154227 -1.145392  
C -0.889029 2.115456 -1.082897  
H -0.539211 1.535853 -1.942797  
H -0.974471 3.160468 -1.410076  
C -2.260045 1.624521 -0.615297  
H -2.966113 1.569095 -1.449255  
H -2.696347 2.298436 0.130138  
N 0.150184 -1.996895 -0.018345  
N 2.150253 0.003688 0.034806  
N 0.128428 1.991768 0.003315

O 0.144411 -0.033483 2.856199  
H 0.862091 0.018883 3.511333  
H -0.675971 -0.113585 3.373694

[Cu<sup>II</sup>L<sup>2</sup>(OH)]<sup>+</sup>

H 0.371737 -2.548631 0.940955  
H -2.917896 -0.453170 0.627087  
H -0.558097 2.398459 0.466435  
Cu -0.296959 -0.058635 0.961783  
S 2.349989 0.196101 0.396371  
C 2.054167 1.235623 -1.104515  
H 3.011070 1.653507 -1.431378  
H 1.673742 0.597024 -1.908219  
C 1.063931 2.368245 -0.796893  
H 1.476277 3.003908 -0.006915  
H 0.968818 2.997783 -1.693795  
C -1.308171 1.745682 -1.335570  
H -0.932373 1.164741 -2.186934  
H -1.635668 2.717020 -1.738704  
C -2.531587 1.061574 -0.704443  
H -2.942417 1.708099 0.077429  
H -3.311758 0.923228 -1.465191  
C -2.048183 -1.378405 -0.989961  
H -1.523427 -1.022021 -1.881209  
H -3.025292 -1.755578 -1.320044  
C -1.250768 -2.495650 -0.318295  
H -1.792060 -2.862042 0.560964  
H -1.127121 -3.343369 -1.004685  
C 1.140213 -2.034275 -0.876215  
H 0.806426 -1.460032 -1.745773  
H 1.293023 -3.070330 -1.211856  
C 2.462189 -1.485231 -0.336717  
H 3.219023 -1.495926 -1.127090  
H 2.842184 -2.117945 0.473919  
N -0.240217 1.866498 -0.343664  
N -2.192448 -0.235554 -0.055861  
N 0.067568 -1.979803 0.148226  
O -0.561520 1.113589 2.366573  
H -1.327086 0.956000 2.943506

[Cu<sup>II</sup>L<sup>3</sup>(H<sub>2</sub>O)]<sup>2+</sup>

H -1.716995 2.187990 0.739340  
H 2.003255 1.906997 0.640894  
Cu 0.044537 0.225901 0.644518  
S 1.408485 -1.725830 0.231200  
C 2.251359 -0.856005 -1.174193  
H 3.088192 -1.475769 -1.509679  
H 1.553509 -0.737208 -2.008904  
C 2.758488 0.488334 -0.647641  
H 3.464934 0.327539 0.172151  
H 3.300029 1.011806 -1.445335  
C 1.016209 2.244962 -1.134907  
H 0.783571 1.653830 -2.026706  
H 1.715313 3.033126 -1.440787  
C -0.245527 2.865490 -0.537776  
H 0.015942 3.505423 0.311388  
H -0.751315 3.495738 -1.278795  
C -2.106931 1.251821 -1.047451  
H -1.521585 0.937792 -1.916983  
H -2.796649 2.036332 -1.386887

C -2.914032 0.083333 -0.481792  
H -3.607545 0.411542 0.300300  
H -3.514350 -0.396770 -1.260657  
C -1.108793 -2.144316 -1.051330  
H -0.904464 -1.466949 -1.885670  
H -1.833943 -2.894371 -1.385079  
C 0.160806 -2.841833 -0.558831  
H 0.649527 -3.374355 -1.381315  
H -0.064321 -3.581058 0.216590  
N 1.642143 1.337800 -0.128089  
N -1.163831 1.797484 -0.026598  
O 0.406305 0.527451 2.824753  
H -0.092381 1.057617 3.470747  
H 0.901849 -0.122630 3.353406  
S -1.873000 -1.198237 0.351254

[Cu<sup>II</sup>L<sup>3</sup>(OH)]<sup>+</sup>

H -2.466998 -1.585124 0.465609  
H -1.580834 2.136907 0.464144  
Cu -0.386636 -0.048105 0.990895  
S 1.978797 1.284328 0.394465  
C 1.278076 2.057878 -1.128563  
H 1.984718 2.804236 -1.504025  
H 1.150116 1.292105 -1.901425  
C -0.065284 2.723849 -0.801284  
H 0.082347 3.472254 -0.015998  
H -0.413403 3.264758 -1.693408  
C -1.992981 1.220105 -1.327406  
H -1.415540 0.897599 -2.201890  
H -2.713503 1.970534 -1.688211  
C -2.789496 0.047800 -0.735930  
H -3.414357 0.410285 0.085852  
H -3.453075 -0.373082 -1.503346  
C -1.299234 -1.895507 -1.194438  
H -0.829101 -1.257429 -1.947637  
H -2.073363 -2.485212 -1.707332  
C -0.264873 -2.842310 -0.586818  
H -0.729157 -3.538712 0.120338  
H 0.212951 -3.446195 -1.364111  
C 2.149329 -1.267253 -0.884284  
H 1.554152 -0.947647 -1.744429  
H 2.831140 -2.058341 -1.213087  
C 2.959307 -0.105362 -0.297475  
H 3.637684 0.280552 -1.065600  
H 3.583002 -0.450377 0.533727  
N -1.065327 1.754621 -0.328586  
N -1.908171 -1.013967 -0.169644  
O -1.264307 0.868244 2.338340  
H -1.782668 0.355691 2.981584  
S 1.029216 -1.978921 0.398120

[Cu<sup>II</sup>L<sup>4</sup>(H<sub>2</sub>O)]<sup>2+</sup>

H 0.074321 2.586314 0.793868  
H 0.341534 -2.626679 0.737600  
Cu 0.203788 -0.017908 0.689075  
S -2.170664 0.158973 0.409140  
C -2.149083 -1.149992 -0.904259  
H -3.183514 -1.429203 -1.125229  
H -1.699549 -0.747688 -1.816956  
C -1.378520 -2.351302 -0.354685

H -1.857758 -2.719431 0.557485  
H -1.403677 -3.167397 -1.087508  
C 0.991862 -2.140657 -1.153735  
H 0.647986 -1.491350 -1.965021  
H 0.981773 -3.170727 -1.535100  
C 2.417532 -1.783281 -0.732905  
H 2.829321 -2.524594 -0.039175  
H 3.087269 -1.746787 -1.597348  
C 2.403647 1.141613 -1.092217  
H 1.872742 0.753137 -1.966112  
H 3.413913 1.424864 -1.401941  
C 1.686172 2.333341 -0.457110  
H 2.246645 2.689564 0.412444  
H 1.643968 3.159774 -1.177488  
C -0.747992 2.137997 -1.038256  
H -0.481034 1.507535 -1.892390  
H -0.772268 3.176124 -1.396469  
C -2.128893 1.770676 -0.494681  
H -2.875681 1.750493 -1.294106  
H -2.474130 2.498187 0.248276  
N 0.037466 -2.000798 -0.012069  
N 0.307259 1.975102 0.007515  
O 0.322250 -0.024740 2.902522  
H 1.133438 -0.025561 3.440310  
H -0.418447 -0.032384 3.533948  
S 2.543335 -0.188904 0.192736

[Cu<sup>II</sup>L<sup>4</sup>(OH)]<sup>+</sup>

H -0.255952 -2.310571 0.585411  
H -0.220645 2.704745 0.783172  
Cu -0.311037 0.174379 1.013985  
S 2.249970 -0.243021 0.466505  
C 2.222702 1.086793 -0.808507  
H 3.248855 1.360449 -1.071362  
H 1.731596 0.721348 -1.715723  
C 1.501685 2.306953 -0.236558  
H 1.979022 2.609362 0.700960  
H 1.588973 3.150223 -0.934814  
C -0.834668 2.239818 -1.102096  
H -0.547467 1.526298 -1.880195  
H -0.700253 3.247991 -1.520149  
C -2.302314 2.063183 -0.713659  
H -2.615984 2.838348 -0.005039  
H -2.943779 2.158104 -1.594909  
C -2.491683 -0.753188 -1.237374  
H -1.939783 -0.280640 -2.055795  
H -3.494118 -0.997686 -1.600546  
C -1.781373 -2.025734 -0.753009  
H -2.358200 -2.474871 0.061903  
H -1.783516 -2.750481 -1.580372  
C 0.675225 -1.953497 -1.215053  
H 0.551409 -1.241295 -2.040341  
H 0.664712 -2.960388 -1.663513  
C 2.039087 -1.771783 -0.536796  
H 2.841854 -1.823847 -1.278268  
H 2.215725 -2.577243 0.184924  
N 0.063617 2.036718 0.062726  
N -0.421307 -1.766137 -0.261810  
O -0.474863 -0.961058 2.460948  
H -1.318704 -0.911282 2.941034

S -2.675482 0.473734 0.137224

[Cu<sup>II</sup>L<sup>5</sup>(H<sub>2</sub>O)]<sup>2+</sup>

H 0.202697 -2.752200 0.584078  
Cu -0.008384 -0.175529 0.688692  
S -2.372843 -0.034402 0.209655  
C -2.216908 -1.275320 -1.158990  
H -3.224291 -1.576542 -1.461691  
H -1.721452 -0.818587 -2.020936  
C -1.446269 -2.477567 -0.611851  
H -1.973053 -2.901217 0.248582  
H -1.399804 -3.259485 -1.380180  
C 0.962490 -2.180712 -1.240600  
H 0.646843 -1.526133 -2.058997  
H 1.016966 -3.200891 -1.644606  
C 2.343221 -1.783945 -0.720161  
H 2.729729 -2.517954 -0.004458  
H 3.069232 -1.719412 -1.536406  
C 2.283240 1.120323 -1.086335  
H 1.689249 0.764475 -1.932694  
H 3.305379 1.302363 -1.435859  
C 1.712098 2.404272 -0.482457  
H 2.354377 2.792331 0.314637  
H 1.636941 3.186102 -1.245580  
C -1.130464 2.174644 -1.105566  
H -0.708677 1.583834 -1.923603  
H -1.270036 3.202436 -1.458283  
C -2.470878 1.612993 -0.627108  
H -3.172172 1.530447 -1.463904  
H -2.933128 2.265607 0.120282  
N -0.066834 -2.105947 -0.161894  
O -0.035134 -0.605832 2.849527  
H 0.719585 -0.522030 3.458392  
H -0.830249 -0.598368 3.410883  
S 0.054715 2.219183 0.319811  
S 2.357798 -0.192548 0.220143

[Cu<sup>II</sup>L<sup>5</sup>(OH)]<sup>+</sup>

H 0.648156 -2.517983 0.394334  
Cu 0.143254 -0.137252 1.042906  
S -2.461369 -0.518984 0.318421  
C -2.029030 -1.490660 -1.191287  
H -2.938377 -1.964831 -1.572630  
H -1.650380 -0.812508 -1.963341  
C -0.985733 -2.560637 -0.848561  
H -1.369036 -3.199048 -0.046153  
H -0.846756 -3.205101 -1.728908  
C 1.327510 -1.826195 -1.418990  
H 0.935688 -1.195219 -2.225734  
H 1.607531 -2.787185 -1.881447  
C 2.613232 -1.227962 -0.833096  
H 3.071153 -1.921731 -0.119895  
H 3.346883 -1.041754 -1.623243  
C 1.901332 1.544119 -1.141699  
H 1.313198 1.032122 -1.908211  
H 2.803531 1.946359 -1.615237  
C 1.107892 2.687085 -0.506390  
H 1.707698 3.216439 0.240803  
H 0.821706 3.419677 -1.268033  
C -1.650700 1.914386 -0.941137

H -1.178772 1.401016 -1.783994  
H -1.984463 2.900527 -1.280649  
C -2.849111 1.129137 -0.397516  
H -3.591252 1.007463 -1.193346  
H -3.336650 1.680951 0.412808  
N 0.291708 -1.982353 -0.398411  
O 0.484977 -1.429158 2.327998  
H 1.173074 -1.207851 2.979104  
S -0.409384 2.165067 0.398070  
S 2.419413 0.324108 0.144538

[Cu<sup>II</sup>L<sup>6</sup>(H<sub>2</sub>O)]<sup>2+</sup>

H 0.058358 2.581652 0.820301  
H 0.247617 -2.601085 0.796991  
Cu 0.127263 -0.014428 0.617434  
S -2.221748 0.164165 0.332790  
C -2.156694 -1.146599 -0.984071  
H -3.184119 -1.419433 -1.242613  
H -1.671172 -0.744934 -1.878460  
C -1.411753 -2.352177 -0.403276  
H -1.937733 -2.729423 0.478787  
H -1.394378 -3.161525 -1.143359  
C 1.012382 -2.137230 -1.063408  
H 0.626009 -1.648065 -1.963468  
H 1.177818 -3.194538 -1.307209  
C 2.319692 -1.487801 -0.615589  
H 2.771608 -2.019788 0.226578  
H 3.047458 -1.453613 -1.431330  
C 2.274632 0.962142 -1.050577  
H 1.798990 0.739536 -2.013566  
H 3.350725 1.086108 -1.207982  
C 1.688541 2.199470 -0.382293  
H 2.256547 2.429737 0.523194  
H 1.760984 3.062330 -1.055734  
C -0.753411 2.175800 -1.034942  
H -0.466257 1.575789 -1.903964  
H -0.758915 3.226700 -1.353947  
C -2.152736 1.793900 -0.545917  
H -2.872817 1.784871 -1.369673  
H -2.526444 2.503097 0.200835  
N -0.017395 -1.996405 0.015998  
N 0.267810 1.961369 0.034882  
O 0.620665 -0.088989 2.761649  
H 1.512225 -0.072613 3.151731  
H -0.001230 -0.112679 3.509886  
O 2.052489 -0.141030 -0.129518

[Cu<sup>II</sup>L<sup>6</sup>(OH)]<sup>+</sup>

H -0.193724 -2.612062 0.525509  
H -0.197218 2.584148 0.925634  
Cu -0.020930 -0.126734 1.010263  
S 2.326284 -0.281126 0.292688  
C 2.237417 1.155708 -0.865047  
H 3.256366 1.456314 -1.123384  
H 1.730436 0.851015 -1.785434  
C 1.510479 2.314694 -0.169647  
H 2.026770 2.562881 0.763633  
H 1.568081 3.201487 -0.817572  
C -0.822391 2.172979 -0.980471  
H -0.431691 1.606159 -1.832347



H -0.861142 3.229125 -1.287725  
C -2.235046 1.695941 -0.641409  
H -2.650300 2.280608 0.186779  
H -2.894377 1.832666 -1.508568  
C -2.304072 -0.667325 -1.198776  
H -1.719168 -0.378238 -2.083825  
H -3.343518 -0.817028 -1.521139  
C -1.783049 -1.962903 -0.584304  
H -2.371786 -2.193963 0.307128  
H -1.908099 -2.783392 -1.304503  
C 0.623679 -1.962583 -1.249947  
H 0.373695 -1.201183 -1.995005  
H 0.549352 -2.938749 -1.752146  
C 2.060826 -1.771960 -0.759710  
H 2.755266 -1.747990 -1.604656  
H 2.370575 -2.601743 -0.114356  
N 0.105005 1.979684 0.160587  
N -0.361813 -1.862160 -0.147853  
O -1.089485 -0.443383 2.467976  
H -1.962622 -0.017381 2.477139  
O -2.240497 0.342216 -0.196608

[Cu<sup>1</sup>L<sup>1</sup>(NO<sub>3</sub>)]

H 1.515844 -0.620379 1.565934  
H 0.577486 2.886604 0.503383  
H -1.470801 1.169482 -2.306328  
Cu 0.274693 0.249559 -0.426901  
C -2.274957 -1.469038 -0.435976  
H -2.895917 -2.362525 -0.625632  
H -2.653722 -1.019508 0.488658  
C -2.459220 -0.485931 -1.604352  
H -2.080022 -0.950893 -2.522025  
H -3.537031 -0.303385 -1.753665  
C -2.369849 1.772289 -0.567460  
H -2.788370 1.262697 0.307155  
H -3.216994 2.254146 -1.085519  
C -1.384111 2.860072 -0.108316  
H -0.991139 3.380712 -0.990148  
H -1.939653 3.607240 0.485162  
C -0.454024 1.982849 2.033083  
H -1.453112 1.543871 2.136165  
H -0.436989 2.883893 2.670453  
C 0.598411 0.976407 2.535893  
H 1.595418 1.422016 2.435701  
H 0.434066 0.797527 3.612654  
C -0.350306 -1.296641 2.158049  
H -1.325709 -0.833897 2.358591  
H -0.046867 -1.801148 3.093213  
C -0.487334 -2.364872 1.059102  
H -1.199566 -3.136519 1.399376  
H 0.484948 -2.849870 0.922436  
N -1.705667 0.763360 -1.403195  
N -0.241420 2.294151 0.614646  
N 0.580694 -0.251877 1.748279  
N 3.016917 -0.520655 -1.004133  
O 2.026481 0.161471 -1.482383  
O 2.884498 -1.097582 0.112895  
O 4.064855 -0.591517 -1.655086  
N -0.861360 -1.786245 -0.239301  
H -0.519760 -2.376705 -0.993591

[Cu<sup>II</sup>L<sup>I</sup>(NO<sub>3</sub>)<sup>+</sup>

H -0.143501 -0.058338 -2.503596  
H -1.504378 2.634990 0.056465  
H -0.333213 0.101292 2.521606  
Cu -0.493415 -0.111707 -0.003712  
C 2.276994 -1.187830 0.951758  
H 3.004775 -1.973391 1.198341  
H 2.854431 -0.314193 0.632087  
C 1.458984 -0.840189 2.197832  
H 0.899960 -1.721743 2.528828  
H 2.127860 -0.547304 3.018302  
C 0.956233 1.613570 2.047657  
H 1.869164 1.718829 1.452016  
H 1.224401 1.837018 3.089653  
C -0.122640 2.595339 1.574283  
H -0.997694 2.516784 2.229668  
H 0.257978 3.623129 1.665809  
C 0.325159 2.776465 -0.864147  
H 1.359062 2.713241 -0.508800  
H 0.137791 3.833379 -1.100108  
C 0.159218 1.934330 -2.131089  
H -0.870039 2.017624 -2.495624  
H 0.821022 2.308801 -2.923495  
C 1.822133 0.061546 -1.959259  
H 2.432443 0.722260 -1.334696  
H 2.193072 0.159616 -2.988911  
C 1.951144 -1.397298 -1.504006  
H 3.006273 -1.702067 -1.562864  
H 1.391356 -2.043198 -2.190145  
N 0.471318 0.225905 1.904948  
N -0.562542 2.275342 0.202318  
N 0.414694 0.499580 -1.855057  
N -2.704376 -1.224687 -0.045602  
O -2.017671 -1.026011 1.035029  
O -2.107655 -0.775682 -1.103653  
O -3.776093 -1.765896 -0.063559  
N 1.383270 -1.581951 -0.154156  
H 1.105902 -2.554841 -0.034504

[Cu<sup>I</sup>L<sup>2</sup>(NO<sub>3</sub>)

H 1.450641 -0.767197 1.479884  
H 0.691778 2.744934 0.368163  
H -1.481332 1.115709 -2.304614  
Cu 0.222552 0.115065 -0.482282  
S -0.873312 -2.234171 -0.480787  
C -2.552287 -1.477397 -0.504358  
H -3.306775 -2.253601 -0.671643  
H -2.755234 -1.014764 0.466650  
C -2.637120 -0.435642 -1.631819  
H -2.341450 -0.904718 -2.576771  
H -3.689606 -0.124426 -1.741406  
C -2.342152 1.781063 -0.571250  
H -2.756887 1.307311 0.325482  
H -3.180847 2.287465 -1.078732  
C -1.295264 2.830544 -0.165765  
H -0.904919 3.314705 -1.069316  
H -1.799265 3.615065 0.425719  
C -0.339203 1.947763 1.962069  
H -1.360275 1.578320 2.114977

H -0.234001 2.852467 2.585841  
C 0.667010 0.883490 2.431755  
H 1.685192 1.254058 2.267158  
H 0.549966 0.731304 3.518048  
C -0.410988 -1.338842 2.213108  
H -1.383605 -0.846732 2.346272  
H -0.112741 -1.709811 3.211683  
C -0.562236 -2.566097 1.303033  
H -1.338284 -3.231099 1.696806  
H 0.374097 -3.135808 1.285060  
N -1.753278 0.721436 -1.405873  
N -0.164427 2.222614 0.533967  
N 0.530437 -0.365447 1.677621  
N 3.115424 -0.077409 -0.862199  
O 2.037842 0.389428 -1.406262  
O 3.034598 -0.686514 0.242662  
O 4.196171 0.089461 -1.435868

[Cu<sup>II</sup>L<sup>2</sup>(NO<sub>3</sub>)]<sup>+</sup>

H -0.050082 -0.158043 -2.467966  
H -1.544111 2.608928 0.112257  
H -0.316650 0.116426 2.470933  
Cu -0.525533 -0.110711 -0.003289  
S 1.422731 -2.099550 -0.214956  
C 2.388698 -1.311490 1.144661  
H 3.100941 -2.042978 1.536995  
H 2.966663 -0.473575 0.742705  
C 1.462189 -0.860437 2.276237  
H 0.875937 -1.714271 2.629914  
H 2.072104 -0.512070 3.121519  
C 1.009285 1.583376 1.974402  
H 1.894530 1.675278 1.336030  
H 1.327709 1.806715 3.002054  
C -0.080260 2.575620 1.552525  
H -0.921058 2.509770 2.252680  
H 0.316317 3.598899 1.621319  
C 0.232334 2.762058 -0.909119  
H 1.278489 2.777425 -0.586000  
H -0.026616 3.794031 -1.182240  
C 0.074804 1.858502 -2.132965  
H -0.971911 1.851143 -2.453745  
H 0.676567 2.241198 -2.968074  
C 1.888753 0.151604 -1.904616  
H 2.413001 0.747691 -1.150815  
H 2.282658 0.457058 -2.885271  
C 2.168092 -1.340897 -1.714523  
H 3.247291 -1.521225 -1.718383  
H 1.748184 -1.919756 -2.545423  
N 0.503560 0.196431 1.866070  
N -0.593027 2.256972 0.205896  
N 0.444359 0.453353 -1.814558  
N -2.806456 -1.053623 -0.028620  
O -2.103211 -0.888932 1.047997  
O -2.182968 -0.659697 -1.093623  
O -3.913273 -1.516516 -0.036242

[Cu<sup>I</sup>L<sup>3</sup>(NO<sub>3</sub>)]

H 1.797863 -0.595948 1.281931  
H 0.427731 2.796398 0.535074  
Cu 0.261430 0.186408 -0.476896

S -1.948983 0.620131 -1.497175  
C -2.622642 1.645981 -0.120242  
H -3.559308 2.113883 -0.441105  
H -2.840953 0.996233 0.733737  
C -1.609018 2.734233 0.270500  
H -1.392346 3.354290 -0.606524  
H -2.087709 3.390969 1.017790  
C -0.307897 1.774961 2.159845  
H -1.233285 1.230549 2.383864  
H -0.275653 2.642511 2.841741  
C 0.898995 0.864045 2.430898  
H 1.820520 1.401915 2.178628  
H 0.944798 0.638778 3.509420  
C 0.169267 -1.489048 2.207991  
H -0.842591 -1.176736 2.498400  
H 0.662673 -1.838133 3.134082  
C 0.099690 -2.688599 1.254418  
H 1.107240 -3.075014 1.063700  
H -0.480073 -3.497953 1.710946  
C -2.289140 -1.870559 -0.120134  
H -2.357851 -1.352976 0.841598  
H -2.909690 -2.772942 -0.062693  
C -2.822168 -0.981886 -1.251926  
H -3.887682 -0.779938 -1.095153  
H -2.731762 -1.494721 -2.215537  
N -0.345848 2.171428 0.749098  
N 0.857867 -0.350929 1.613126  
N 3.161568 0.237772 -1.035581  
O 2.017154 0.707210 -1.413859  
O 3.216829 -0.511156 -0.016026  
O 4.172542 0.536349 -1.675498  
S -0.539344 -2.344437 -0.434791

[Cu<sup>II</sup>L<sup>3</sup>(NO<sub>3</sub>)]<sup>+</sup>

H -1.392838 2.447176 0.944405  
H -1.003444 -1.077462 2.147203  
Cu -0.629419 -0.112747 -0.088110  
S 1.388873 -2.001372 -0.788001  
C 1.971385 -2.008833 0.960258  
H 2.590552 -2.894818 1.127756  
H 2.594107 -1.127756 1.144832  
C 0.772591 -2.048568 1.908440  
H 0.126984 -2.894311 1.651738  
H 1.128184 -2.210156 2.935404  
C 0.400326 0.285242 2.723063  
H 1.440046 0.513098 2.467134  
H 0.387823 -0.023267 3.777383  
C -0.494678 1.513911 2.538407  
H -1.519213 1.268702 2.840493  
H -0.146366 2.319102 3.201230  
C 0.620065 2.760381 0.717748  
H 1.522827 2.324182 1.156063  
H 0.538271 3.782837 1.116487  
C 0.774286 2.843761 -0.802820  
H -0.091513 3.333416 -1.262038  
H 1.657380 3.432934 -1.068916  
C 2.536789 0.584685 -1.239120  
H 2.761233 0.756688 -0.181863  
H 3.268000 1.139653 -1.836796  
C 2.620778 -0.904056 -1.599730

H 3.626407 -1.276454 -1.379450  
H 2.452773 -1.049307 -2.671792  
N -0.060243 -0.818709 1.848740  
N -0.531364 1.930775 1.120281  
N -2.917969 -0.619545 -0.884241  
O -2.413280 -1.125334 0.196621  
O -2.092745 0.171179 -1.491864  
O -4.026778 -0.856447 -1.276010  
S 0.856887 1.212837 -1.637936

[Cu<sup>I</sup>L<sup>4</sup>(NO<sub>3</sub>)]

H 1.413643 0.109147 1.545961  
H -1.559543 0.395401 -2.461897  
Cu 0.237084 0.271738 -0.551697  
S -0.169371 -2.352575 0.035503  
C -1.966586 -2.127791 -0.291756  
H -2.446147 -3.107849 -0.386879  
H -2.432921 -1.615746 0.555698  
C -2.180623 -1.344750 -1.594648  
H -1.613054 -1.823960 -2.399426  
H -3.247906 -1.403497 -1.867127  
C -2.725257 0.950660 -0.880619  
H -2.868086 0.616170 0.152227  
H -3.707303 0.871079 -1.379863  
C -2.308371 2.423532 -0.900291  
H -2.242314 2.785209 -1.933965  
H -3.079036 3.023977 -0.404804  
C -0.899098 2.492494 1.612972  
H -1.831831 1.936763 1.758146  
H -0.999643 3.452978 2.129220  
C 0.294216 1.715249 2.192385  
H 1.220594 2.255187 1.968227  
H 0.190954 1.699591 3.291021  
C -0.321075 -0.671114 2.364860  
H -1.395960 -0.457878 2.286332  
H -0.082872 -0.667393 3.444566  
C -0.019911 -2.082528 1.847460  
H -0.638009 -2.810751 2.383380  
H 1.028073 -2.334824 2.044701  
N -1.735750 0.062387 -1.514302  
N 0.422428 0.362284 1.645870  
N 3.137835 -0.034113 -0.700537  
O 2.100565 0.291494 -1.398829  
O 3.008659 -0.234985 0.544470  
O 4.230256 -0.140833 -1.261803  
S -0.660243 2.809167 -0.189821

[Cu<sup>II</sup>L<sup>4</sup>(NO<sub>3</sub>)<sup>+</sup>

H -0.050274 -0.106726 -2.423449  
H -0.339188 0.240503 2.442724  
Cu -0.580303 -0.097307 -0.001976  
S 1.245928 -2.171181 -0.288516  
C 2.190284 -1.553095 1.172905  
H 2.764220 -2.386790 1.587099  
H 2.907196 -0.793834 0.846279  
C 1.248626 -1.017370 2.252089  
H 0.522085 -1.789882 2.521996  
H 1.831573 -0.784719 3.154226  
C 1.212681 1.461989 1.930906  
H 1.991298 1.479291 1.161611

H 1.721366 1.528728 2.903832  
C 0.278125 2.666327 1.794736  
H -0.404581 2.718621 2.651011  
H 0.860330 3.592725 1.800015  
C 0.335765 2.932438 -1.065170  
H 1.362428 2.912361 -0.687268  
H 0.154773 3.933603 -1.466310  
C 0.122678 1.906866 -2.179048  
H -0.923643 1.922292 -2.499338  
H 0.735745 2.186486 -3.047293  
C 1.875466 0.165867 -1.804559  
H 2.379750 0.701346 -0.993983  
H 2.324918 0.511665 -2.746973  
C 2.100280 -1.343456 -1.690165  
H 3.172152 -1.558308 -1.643373  
H 1.715258 -1.855874 -2.579633  
N 0.475303 0.180652 1.826587  
N 0.435061 0.511015 -1.768070  
N -2.837991 -1.073387 -0.063715  
O -2.140392 -0.935725 1.020510  
O -2.213497 -0.637056 -1.112386  
O -3.937097 -1.550748 -0.092734  
S -0.836314 2.648493 0.332831

[Cu<sup>I</sup>L<sup>5</sup>(NO<sub>3</sub>)]

H 0.825460 2.060986 0.395352  
Cu 0.468796 -0.176907 -0.387380  
S -2.028784 0.474838 -1.728494  
C -2.400501 1.655473 -0.361345  
H -3.202555 2.328345 -0.682439  
H -2.761904 1.096483 0.508116  
C -1.154859 2.476435 0.004989  
H -0.733316 2.922860 -0.902253  
H -1.474169 3.311387 0.651905  
C -0.221643 1.570463 2.099926  
H -1.145845 1.029361 2.342883  
H -0.310878 2.564617 2.574485  
C 0.987815 0.879767 2.739828  
H 1.888743 1.481889 2.579191  
H 0.835536 0.793609 3.820940  
C 0.020286 -1.816943 2.494130  
H -0.870853 -1.192246 2.608468  
H 0.209829 -2.306689 3.456544  
C -0.209907 -2.901257 1.433293  
H 0.698746 -3.494687 1.286668  
H -0.995291 -3.590108 1.765085  
C -2.394316 -1.781508 0.005722  
H -2.459548 -1.157003 0.902146  
H -3.000973 -2.680107 0.171135  
C -2.939307 -1.036154 -1.217208  
H -3.991999 -0.786945 -1.041440  
H -2.906383 -1.683306 -2.100516  
N -0.099887 1.683252 0.644997  
N 2.838400 1.297640 -1.300452  
O 2.035228 0.333255 -1.606058  
O 2.556530 2.049750 -0.317290  
O 3.857362 1.467387 -1.969995  
S -0.643728 -2.297126 -0.250128  
S 1.458276 -0.757795 2.050911

[Cu<sup>II</sup>L<sup>5</sup>(NO<sub>3</sub>)<sup>+</sup>

H -1.031179 -0.920841 2.170752  
Cu -0.671261 -0.157526 -0.142864  
S 1.346541 -2.010163 -0.836514  
C 1.841074 -2.134074 0.935880  
H 2.345741 -3.092044 1.090650  
H 2.559119 -1.343187 1.174027  
C 0.612345 -2.072642 1.842828  
H -0.114668 -2.829704 1.532752  
H 0.913669 -2.309651 2.872674  
C 0.538040 0.285520 2.660935  
H 1.501208 0.559710 2.219424  
H 0.746323 -0.118145 3.662741  
C -0.365978 1.509877 2.814030  
H -1.293022 1.241189 3.334062  
H 0.131511 2.265665 3.429354  
C 0.640503 3.048908 0.643389  
H 1.487343 2.597017 1.167743  
H 0.619058 4.111994 0.904705  
C 0.803637 2.926763 -0.873726  
H -0.034958 3.397649 -1.396890  
H 1.714344 3.441941 -1.197692  
C 2.512626 0.592731 -1.101856  
H 2.693724 0.722188 -0.030403  
H 3.258354 1.180843 -1.647960  
C 2.624198 -0.877505 -1.522225  
H 3.615385 -1.259992 -1.258379  
H 2.520240 -0.973836 -2.607675  
N -0.086231 -0.757634 1.813570  
N -2.863636 -0.864427 -1.017357  
O -2.388545 -1.247852 0.128893  
O -2.053395 -0.077754 -1.646112  
O -3.932207 -1.205045 -1.439932  
S 0.843598 1.220348 -1.547893  
S -0.923946 2.273920 1.239664

[Cu<sup>I</sup>L<sup>6</sup>(NO<sub>3</sub>)

H 1.424520 0.096738 1.558749  
H -1.497710 0.340838 -2.440606  
Cu 0.273212 0.004801 -0.561703  
S -0.258316 -2.413180 0.070738  
C -2.052287 -2.113937 -0.233545  
H -2.573304 -3.074375 -0.306478  
H -2.479149 -1.569933 0.614793  
C -2.250352 -1.336469 -1.544184  
H -1.739489 -1.864615 -2.356338  
H -3.326072 -1.327098 -1.786609  
C -2.645348 1.007567 -0.888335  
H -2.944376 0.621965 0.091878  
H -3.567838 1.098958 -1.487903  
C -2.025577 2.401102 -0.737379  
H -1.724247 2.786560 -1.718387  
H -2.784923 3.087004 -0.329148  
C -1.025480 2.326726 1.457873  
H -1.913280 1.726895 1.706076  
H -1.175681 3.333909 1.876235  
C 0.228639 1.695608 2.057990  
H 1.098263 2.271604 1.726302  
H 0.174607 1.775660 3.157684  
C -0.302560 -0.698563 2.384369

H -1.375513 -0.469446 2.341986  
H -0.024402 -0.681485 3.454520  
C -0.050132 -2.124518 1.878348  
H -0.670058 -2.832713 2.438177  
H 0.996555 -2.402789 2.045832  
N -1.708418 0.038517 -1.490028  
N 0.422117 0.309571 1.615001  
N 3.145286 0.219882 -0.734603  
O 2.064704 0.408750 -1.423007  
O 3.050414 -0.115230 0.482208  
O 4.237970 0.372543 -1.283999  
O -0.848376 2.413073 0.048227

[Cu<sup>II</sup>L<sup>6</sup>(NO<sub>3</sub>)]<sup>+</sup>

H -0.083836 -0.075843 -2.463950  
H -0.333066 0.125059 2.450227  
Cu -0.524374 -0.152072 -0.017873  
S 1.285032 -2.170701 -0.258525  
C 2.284155 -1.466723 1.126598  
H 2.941478 -2.250732 1.512864  
H 2.919958 -0.662945 0.742718  
C 1.374491 -0.973997 2.255148  
H 0.727107 -1.791741 2.586701  
H 1.994254 -0.680072 3.113446  
C 1.102763 1.498222 1.991530  
H 2.011690 1.531504 1.381934  
H 1.401020 1.686176 3.032891  
C 0.103508 2.567325 1.544755  
H -0.779270 2.566812 2.192820  
H 0.558109 3.563959 1.597653  
C 0.431282 2.782114 -0.842157  
H 1.494070 2.747920 -0.566602  
H 0.171108 3.824847 -1.063358  
C 0.150066 1.912310 -2.057983  
H -0.912017 1.981071 -2.310427  
H 0.730282 2.272771 -2.917933  
C 1.869664 0.097598 -1.891360  
H 2.429771 0.642520 -1.125249  
H 2.274190 0.407389 -2.866121  
C 2.066840 -1.412834 -1.741734  
H 3.134295 -1.652517 -1.753840  
H 1.613242 -1.947249 -2.584602  
N 0.494722 0.153859 1.850359  
N 0.443596 0.477510 -1.784325  
N -2.882086 -0.854519 -0.030161  
O -2.151212 -0.779763 1.039805  
O -2.228589 -0.519404 -1.097306  
O -4.030628 -1.195688 -0.028852  
O -0.381606 2.293646 0.228312

[Cu<sub>2</sub><sup>II</sup>(L<sup>1</sup>)<sub>2</sub>(μ-OH)]<sup>3+</sup>

H 1.892410 -0.982640 -2.456270  
H 2.327619 2.542026 -1.246953  
H 2.221260 1.306047 2.306868  
Cu 2.114714 0.147442 -0.069596  
C 3.705527 -1.564505 1.625098  
H 3.912245 -2.482178 2.189467  
H 4.620675 -1.307557 1.082691  
C 3.297013 -0.434957 2.569466  
H 2.421909 -0.733851 3.156296



H 4.104782 -0.216679 3.278438  
C 4.051909 1.688130 1.446158  
H 4.885331 1.075721 1.087708  
H 4.407158 2.226399 2.333611  
C 3.599563 2.674601 0.371178  
H 2.824336 3.337050 0.771290  
H 4.436642 3.309121 0.055550  
C 3.991986 1.486823 -1.814853  
H 4.838997 1.026817 -1.296416  
H 4.386059 2.335868 -2.386967  
C 3.312716 0.484758 -2.746094  
H 2.507483 0.976036 -3.302483  
H 4.027579 0.096646 -3.481711  
C 3.618460 -1.755788 -1.642390  
H 4.573868 -1.337695 -1.310596  
H 3.823751 -2.355407 -2.537840  
C 2.997131 -2.624187 -0.549341  
H 3.685182 -3.427184 -0.258565  
H 2.083175 -3.098184 -0.923217  
N 2.920159 0.776996 1.784161  
N 3.009708 1.938054 -0.786501  
N 2.700609 -0.620855 -1.949201  
H -1.892447 -0.984361 2.455733  
H -2.327053 2.541397 1.249357  
H -2.220603 1.308360 -2.305393  
Cu -2.114464 0.147727 0.070038  
C -3.705369 -1.562549 -1.626283  
H -3.912081 -2.479738 -2.191437  
H -4.620522 -1.305991 -1.083711  
C -3.296598 -0.432244 -2.569617  
H -2.421463 -0.730766 -3.156589  
H -4.104255 -0.213253 -3.278498  
C -4.051294 1.690009 -1.444584  
H -4.884867 1.077436 -1.086758  
H -4.406349 2.229093 -2.331620  
C -3.598906 2.675502 -0.368725  
H -2.823578 3.338210 -0.768211  
H -4.435937 3.309851 -0.052623  
C -3.991603 1.485975 1.816307  
H -4.838649 1.026512 1.297448  
H -4.385591 2.334600 2.389104  
C -3.312506 0.483051 2.746747  
H -2.507202 0.973754 3.303538  
H -4.027433 0.094451 3.482044  
C -3.618630 -1.756492 1.641158  
H -4.573954 -1.337931 1.309714  
H -3.824047 -2.356830 2.536097  
C -2.997444 -2.624062 0.547355  
H -3.685642 -3.426688 0.255905  
H -2.083598 -3.098554 0.920873  
N -2.919657 0.778976 -1.783232  
N -3.009217 1.937915 0.788374  
N -2.700570 -0.622003 1.948952  
O 0.000146 0.521931 0.000448  
H 0.000251 1.492679 0.000837  
N -2.619112 -1.779630 -0.625122  
H -1.828459 -2.212098 -1.103322  
N 2.619031 -1.780692 0.623746  
H 1.828300 -2.213392 1.101609

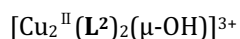

H 1.682073 0.914160 -2.347110  
H 2.513834 2.640528 -1.266572  
H 2.383702 1.539743 2.272311  
Cu 2.008043 0.353959 -0.048806  
S 1.986942 1.902006 0.862548  
C 3.474028 1.574792 1.921913  
H 3.604469 2.416824 2.607731  
H 4.361302 1.512800 1.284934  
C 3.231928 0.280304 2.698019  
H 2.351973 0.388775 3.339376  
H 4.088877 0.087686 3.356196  
C 4.225561 1.607141 1.370515  
H 4.940572 0.872477 0.986455  
H 4.700738 2.106595 2.224245  
C 3.860218 2.629654 0.297381  
H 3.194028 3.391638 0.716123  
H 4.757585 3.145824 -0.064415  
C 4.015193 1.381289 -1.881234  
H 4.840590 0.858017 -1.388772  
H 4.458324 2.171900 -2.499165  
C 3.198648 0.423393 -2.742804  
H 2.410033 0.970063 -3.270467  
H 3.834978 0.046593 -3.502580  
C 3.376595 1.796103 -1.592795  
H 4.323488 1.451691 -1.166578  
H 3.618138 2.334790 -2.519581  
C 2.664873 2.747920 -0.633683  
H 3.326302 3.559677 -0.316098  
H 1.790492 3.210550 -1.104159  
N 2.993290 0.878384 1.788350  
N 3.134703 1.961153 -0.824107  
N 2.535232 0.601613 -1.881126  
H -1.682693 0.915980 2.346734  
H -2.514132 2.639554 1.268728  
H -2.383103 1.541459 -2.271001  
Cu -2.008036 0.353917 0.049303  
S -1.986744 1.901366 -0.863818  
C -3.473584 1.573309 -1.923267  
H -3.603894 2.414811 -2.609759  
H -4.360993 1.511788 -1.286431  
C -3.231297 0.278226 -2.698321  
H -2.351208 0.386218 -3.339577  
H -4.088103 0.085092 -3.356535  
C -4.225187 1.608239 -1.369623  
H -4.940324 0.873307 -0.986305  
H -4.700134 2.108369 -2.223085  
C -3.860071 2.629910 -0.295611  
H -3.193745 3.392191 -0.713597  
H -4.757508 3.145836 0.066358  
C -4.015669 1.379829 1.881962  
H -4.840904 0.856928 1.388837  
H -4.458998 2.169956 2.500368  
C -3.199375 0.421274 2.743031  
H -2.410910 0.967533 3.271344  
H -3.835921 0.049301 3.502262  
C -3.377010 1.797325 1.591259  
H -4.323790 1.452578 1.165060  
H -3.618803 2.336726 2.517565  
C -2.665047 2.748416 0.631611

H -3.326398 3.559930 0.313243  
H -1.790781 3.211403 1.101951  
N -2.992842 0.879752 -1.787707  
N -3.134865 1.960518 0.825550  
N -2.535715 0.603067 1.880745  
O 0.000001 0.975470 0.000572  
H 0.000011 1.945364 0.001242

[Cu<sub>2</sub><sup>II</sup>(L<sup>3</sup>)<sub>2</sub>(μ-OH)]<sup>3+</sup>

H -2.769345 0.145686 -2.876374  
H -1.739747 -2.683115 -0.622741  
Cu -1.987985 -0.129920 -0.357065  
S -1.944264 -0.147894 2.095252  
C -3.124619 -1.572852 2.178780  
H -3.164731 -1.934499 3.210416  
H -4.125621 -1.236129 1.893354  
C -2.599627 -2.664137 1.246119  
H -1.599981 -2.977625 1.561962  
H -3.252026 -3.544223 1.312996  
C -3.744280 -2.382193 -0.969145  
H -4.590639 -1.996604 -0.391835  
H -3.933790 -3.448340 -1.146807  
C -3.603704 -1.644619 -2.297025  
H -2.785368 -2.078176 -2.881589  
H -4.519650 -1.747899 -2.891464  
C -4.465449 0.664949 -1.852007  
H -5.074942 0.225044 -1.057311  
H -5.086649 0.688461 -2.758028  
C -4.046560 2.088651 -1.494260  
H -3.545029 2.584840 -2.332249  
H -4.913409 2.702844 -1.231599  
C -3.856515 1.841645 1.387908  
H -4.650095 1.130748 1.142099  
H -4.324392 2.786695 1.684522  
C -2.969301 1.330863 2.522669  
H -3.574754 1.085716 3.401505  
H -2.242653 2.088477 2.831676  
N -2.504730 -2.185561 -0.163824  
N -3.273547 -0.206300 -2.060372  
H 2.649480 -1.413140 -2.495908  
H 2.031110 2.234333 -1.828465  
Cu 1.980524 0.060127 -0.408602  
S 2.017084 1.201961 1.765409  
C 3.347170 2.367095 1.216239  
H 3.454330 3.154239 1.968284  
H 4.297559 1.830304 1.142163  
C 2.916011 2.960870 -0.124101  
H 1.964186 3.488629 -0.011632  
H 3.659898 3.698078 -0.452196  
C 3.972203 1.566322 -1.921498  
H 4.775400 1.389696 -1.199295  
H 4.286109 2.405268 -2.555235  
C 3.721661 0.325647 -2.773158  
H 2.954761 0.534331 -3.526858  
H 4.634186 0.039695 -3.310360  
C 4.304883 -1.614981 -1.302713  
H 4.986530 -0.940527 -0.776366  
H 4.892333 -2.123109 -2.079986  
C 3.727532 -2.658255 -0.350939  
H 3.137997 -3.410261 -0.886404

H 4.521136 -3.192063 0.180893  
C 3.669617 -1.096995 2.094338  
H 4.530714 -0.677895 1.566408  
H 4.036319 -1.847866 2.802591  
C 2.885359 -0.021195 2.845923  
H 3.544916 0.527239 3.526517  
H 2.089368 -0.462162 3.453726  
N 2.732670 1.904106 -1.163237  
N 3.223931 -0.795358 -1.919641  
O -0.007256 -0.124382 -1.028414  
H -0.020748 -0.110193 -1.997849  
S -2.821061 2.159938 -0.115048  
S 2.554035 -1.943292 0.882304

[Cu<sub>2</sub><sup>II</sup>(L<sup>4</sup>)<sub>2</sub>(μ-OH)]<sup>3+</sup>

H -1.981093 0.495528 -2.455558  
H -2.357015 -1.340159 2.468319  
Cu -2.016322 -0.443638 0.000871  
S -2.092532 1.912405 0.562965  
C -3.490300 1.700591 1.761905  
H -3.594607 2.627388 2.333689  
H -4.419170 1.536779 1.207618  
C -3.159899 0.532196 2.687400  
H -2.224637 0.730112 3.220092  
H -3.948545 0.437490 3.445313  
C -4.262552 -1.499265 1.736389  
H -4.959621 -0.861163 1.184406  
H -4.732186 -1.729644 2.702908  
C -4.006385 -2.807058 0.990385  
H -3.424972 -3.508738 1.598556  
H -4.944402 -3.308504 0.733057  
C -4.208860 -1.864938 -1.756944  
H -5.010436 -1.357884 -1.212264  
H -4.651678 -2.684765 -2.330412  
C -3.447918 -0.916113 -2.678690  
H -2.660044 -1.461395 -3.207343  
H -4.134437 -0.521080 -3.438727  
C -3.672118 1.387112 -1.722393  
H -4.561429 1.072630 -1.167624  
H -4.018305 1.782489 -2.687659  
C -2.924198 2.492853 -0.979870  
H -3.591470 3.323257 -0.729751  
H -2.113390 2.905328 -1.590189  
N -2.993077 -0.744909 1.934109  
N -2.799372 0.197187 -1.921829  
H 1.981025 0.494808 2.455713  
H 2.357046 -1.339420 -2.468693  
Cu 2.016337 -0.443633 -0.001002  
S 2.092680 1.912512 -0.562306  
C 3.490408 1.701088 -1.761360  
H 3.594695 2.628064 -2.332857  
H 4.419295 1.537100 -1.207155  
C 3.159963 0.532987 -2.687206  
H 2.224699 0.731092 -3.219822  
H 3.948596 0.438485 -3.445158  
C 4.262564 -1.498770 -1.736773  
H 4.959631 -0.860843 -1.184585  
H 4.732217 -1.728877 -2.703349  
C 4.006336 -2.806768 -0.991159  
H 3.424965 -3.508273 -1.599572

H 4.944328 -3.308293 -0.733893  
 C 4.208628 -1.865626 1.756523  
 H 5.010323 -1.358481 1.212104  
 H 4.651288 -2.685703 2.329754  
 C 3.447694 -0.917036 2.678512  
 H 2.659720 -1.462421 3.206907  
 H 4.134178 -0.522310 3.438741  
 C 3.672176 1.386457 1.722924  
 H 4.561489 1.072063 1.168105  
 H 4.018348 1.781514 2.688326  
 C 2.924381 2.492474 0.980695  
 H 3.591735 3.322884 0.730814  
 H 2.113598 2.904857 1.591111  
 N 2.993106 -0.744337 -1.934294  
 N 2.799310 0.196553 1.921946  
 O 0.000005 -0.954538 -0.000120  
 H 0.000012 -1.924811 -0.000252  
 S -3.008773 -2.590902 -0.547212  
 S 3.008583 -2.591020 0.546406

[Cu<sub>2</sub><sup>II</sup>(L<sup>5</sup>)<sub>2</sub>(μ-OH)]<sup>3+</sup>

H 1.913542 0.597977 -2.577585  
 Cu 2.009707 0.162722 -0.013447  
 S 2.232247 -2.175142 -0.671789  
 C 3.737262 -2.567639 0.334046  
 H 3.972997 -3.627425 0.187881  
 H 4.580198 -1.975480 -0.032095  
 C 3.458461 -2.298179 1.811222  
 H 2.662738 -2.944947 2.193452  
 H 4.352204 -2.499147 2.411374  
 C 4.449888 0.410858 2.153878  
 H 5.090477 0.075264 1.333104  
 H 4.978693 0.235584 3.097129  
 C 4.096620 1.892391 2.032892  
 H 3.529344 2.240404 2.901657  
 H 5.005749 2.500154 1.975189  
 C 4.197194 2.288337 -0.856407  
 H 4.998641 1.567386 -0.669355  
 H 4.644820 3.282131 -0.952840  
 C 3.391032 1.941513 -2.106354  
 H 2.591126 2.674278 -2.251140  
 H 4.044969 1.999429 -2.986086  
 C 3.633227 -0.515768 -2.482091  
 H 4.560574 -0.498363 -1.901444  
 H 3.911638 -0.364167 -3.534560  
 C 2.931336 -1.864640 -2.352123  
 H 3.605770 -2.687384 -2.609035  
 H 2.069624 -1.933176 -3.024847  
 N 2.760588 0.591270 -2.005738  
 H -1.913913 0.595851 2.578195  
 Cu -2.009756 0.162634 0.013584  
 S -2.232024 -2.175772 0.670094  
 C -3.736804 -2.567846 -0.336269  
 H -3.972289 -3.627807 -0.190969  
 H -4.579948 -1.976200 0.030221  
 C -3.457869 -2.297168 -1.813198  
 H -2.661948 -2.943457 -2.195824  
 H -4.351487 -2.497872 -2.413624  
 C -4.449807 0.411986 -2.153688  
 H -5.090345 0.075599 -1.333200

H -4.978562 0.237375 -3.097089  
C -4.096821 1.893494 -2.031505  
H -3.529589 2.242303 -2.899979  
H -5.006069 2.501036 -1.973354  
C -4.197595 2.287293 0.858082  
H -4.998945 1.566395 0.670437  
H -4.645340 3.280963 0.955241  
C -3.391444 1.939628 2.107802  
H -2.591615 2.672365 2.253150  
H -4.045421 1.996820 2.987553  
C -3.633481 -0.517977 2.481473  
H -4.560698 -0.500203 1.900631  
H -3.912138 -0.367255 3.534003  
C -2.931421 -1.866671 2.350563  
H -3.605803 -2.689693 2.606717  
H -2.069813 -1.935633 3.023377  
N -2.760859 0.589533 2.006193  
O -0.000041 0.667254 0.000285  
H -0.000063 1.637389 0.000716  
S 3.033371 2.312980 0.581526  
S 2.887469 -0.581053 2.178834  
S -2.887209 -0.579628 -2.179423  
S -3.033709 2.313156 -0.579773

[Cu<sub>2</sub><sup>II</sup>(L<sup>6</sup>)<sub>2</sub>(μ-OH)]<sup>3+</sup>

H -1.981645 0.395459 -2.582417  
H -2.040924 -0.647889 2.562211  
Cu -1.994117 -0.088625 -0.007012  
S -2.611036 2.220305 0.167540  
C -3.906637 1.883539 1.448667  
H -4.224933 2.839686 1.874216  
H -4.773774 1.412215 0.977564  
C -3.274130 0.999419 2.524909  
H -2.417875 1.512099 2.974087  
H -4.004306 0.823315 3.325100  
C -3.850212 -1.346381 1.876307  
H -4.722057 -0.905973 1.382170  
H -4.165843 -1.658992 2.880453  
C -3.340303 -2.545412 1.084871  
H -2.512699 -3.045252 1.597880  
H -4.135578 -3.281034 0.928963  
C -3.694615 -2.170450 -1.325418  
H -4.682886 -1.775377 -1.058930  
H -3.811402 -3.214874 -1.634210  
C -3.030134 -1.366066 -2.433006  
H -2.082710 -1.839192 -2.704975  
H -3.671352 -1.349881 -3.323384  
C -3.879391 0.958767 -2.014961  
H -4.694741 0.511161 -1.439833  
H -4.240324 1.080530 -3.045428  
C -3.507473 2.326457 -1.446029  
H -4.390296 2.961216 -1.323096  
H -2.813817 2.864288 -2.101401  
N -2.786975 -0.296169 1.959623  
N -2.715129 0.024635 -1.975813  
H 1.981207 0.394746 2.582374  
H 2.041322 -0.647182 -2.562568  
Cu 1.994072 -0.088584 0.006824  
S 2.611273 2.220329 -0.166932  
C 3.906974 1.883881 -1.448021

H 4.225368 2.840131 -1.873264  
H 4.774048 1.412359 -0.976996  
C 3.274475 1.000139 -2.524574  
H 2.418266 1.513002 -2.973630  
H 4.004679 0.824241 -3.324784  
C 3.850506 -1.345791 -1.876498  
H 4.722216 -0.905479 -1.382038  
H 4.166365 -1.658055 -2.880679  
C 3.340515 -2.545107 -1.085541  
H 2.513049 -3.044838 -1.598879  
H 4.135812 -3.280726 -0.929723  
C 3.694223 -2.170982 1.324978  
H 4.682606 -1.775930 1.058868  
H 3.810839 -3.215502 1.633515  
C 3.029524 -1.366859 2.432636  
H 2.081999 -1.839989 2.704243  
H 3.670528 -1.350986 3.323174  
C 3.879120 0.957976 2.015369  
H 4.694479 0.510429 1.440210  
H 4.239934 1.079369 3.045921  
C 3.507478 2.325889 1.446793  
H 4.390406 2.960566 1.324198  
H 2.813790 2.863614 2.102220  
N 2.787225 -0.295603 -1.959715  
N 2.714740 0.024002 1.975781  
O -0.000025 -0.643610 -0.000225  
H -0.000011 -1.614347 -0.000499  
O -2.808702 -2.098769 -0.184906  
O 2.808627 -2.098897 0.184263

[Cu<sub>2</sub><sup>II</sup>(L<sup>1</sup>)<sub>2</sub>(μ-OH)<sub>2</sub>]<sup>2+</sup>

H -2.313622 -0.743349 -2.412496  
H -2.411137 -3.045597 0.915228  
H -1.412338 0.290779 2.354036  
Cu -1.520866 -0.779055 -0.007059  
C -3.099632 2.495755 0.484045  
H -3.280464 3.572585 0.602122  
H -4.091073 2.033970 0.437610  
C -2.354242 1.995336 1.725039  
H -1.341115 2.412791 1.721712  
H -2.858787 2.381440 2.624207  
C -3.391745 -0.183484 2.335810  
H -4.281913 0.119430 1.773974  
H -3.580506 0.083951 3.386459  
C -3.185980 -1.698529 2.250790  
H -2.332946 -1.987068 2.873312  
H -4.070633 -2.221681 2.635516  
C -4.057904 -2.272760 -0.037283  
H -4.798092 -1.526674 0.262492  
H -4.530044 -3.255626 0.076646  
C -3.627189 -2.045362 -1.486073  
H -2.927997 -2.828991 -1.799027  
H -4.496610 -2.092831 -2.155261  
C -3.864475 0.408096 -1.727064  
H -4.517381 0.408789 -0.850293  
H -4.513503 0.239283 -2.598055  
C -3.203099 1.776517 -1.906511  
H -4.018401 2.487759 -2.116053  
H -2.564759 1.758903 -2.798243  
N -2.222435 0.522070 1.778089

N -2.873932 -2.138163 0.859330  
 N -2.923188 -0.737163 -1.593289  
 H 2.166316 -1.044481 2.205325  
 H 2.370025 -2.879464 -1.465526  
 H 1.630496 0.663748 -2.273344  
 Cu 1.462786 -0.245784 -0.023647  
 C 3.225554 2.477177 -0.009943  
 H 3.366102 3.556237 0.141297  
 H 4.223719 2.030017 0.025120  
 C 2.601818 2.232518 -1.384236  
 H 1.609637 2.695159 -1.423458  
 H 3.213472 2.705616 -2.164520  
 C 3.602346 0.115989 -2.246295  
 H 4.456677 0.250414 -1.575110  
 H 3.873999 0.581845 -3.204007  
 C 3.308504 -1.368727 -2.473154  
 H 2.501476 -1.470327 -3.208479  
 H 4.199847 -1.847187 -2.906041  
 C 3.948130 -2.329136 -0.278922  
 H 4.752637 -1.600397 -0.418123  
 H 4.392202 -3.317214 -0.462208  
 C 3.440796 -2.261244 1.161859  
 H 2.649643 -3.005727 1.307633  
 H 4.251185 -2.513288 1.859158  
 C 3.853933 0.070789 1.938232  
 H 4.623525 0.182775 1.167744  
 H 4.363503 -0.276130 2.848056  
 C 3.163468 1.405981 2.223841  
 H 3.918440 2.135392 2.553448  
 H 2.457846 1.279794 3.053829  
 N 2.429497 0.785754 -1.648842  
 N 2.860696 -2.019826 -1.227413  
 N 2.868671 -0.928574 1.473103  
 O 0.106548 -1.289432 1.082599  
 O -0.208290 0.234285 -1.049916  
 H 0.305769 -2.238404 1.050343  
 H -0.623473 1.116796 -0.925344  
 N -2.364198 2.214271 -0.772377  
 H -1.903649 3.074513 -1.065422  
 N 2.397863 1.868949 1.051088  
 H 1.702180 2.545343 1.358295

[Cu<sub>2</sub><sup>II</sup>(L<sup>2</sup>)<sub>2</sub>(μ-OH)<sub>2</sub>]<sup>2+</sup>

H -2.488927 -0.655757 -2.465241  
 H -2.394780 -3.049043 0.871029  
 H -1.341493 0.207028 2.274493  
 Cu -1.525178 -0.804485 -0.096839  
 S -2.200113 2.552790 -0.940685  
 C -3.017133 2.667018 0.711269  
 H -3.109492 3.730629 0.950209  
 H -4.035435 2.274619 0.632010  
 C -2.227407 1.985525 1.832979  
 H -1.198389 2.358362 1.822385  
 H -2.669869 2.297297 2.792420  
 C -3.335601 -0.186994 2.308629  
 H -4.227849 0.130003 1.757465  
 H -3.510085 0.075742 3.363155  
 C -3.150328 -1.703199 2.216938  
 H -2.291109 -2.002754 2.825662  
 H -4.034334 -2.216299 2.616063



C -4.071402 -2.302709 -0.046769  
H -4.828636 -1.588439 0.285913  
H -4.506969 -3.302962 0.059782  
C -3.682849 -2.036401 -1.499730  
H -2.961493 -2.786832 -1.842600  
H -4.564523 -2.104147 -2.150748  
C -4.024524 0.408124 -1.610368  
H -4.488906 0.457491 -0.622334  
H -4.824878 0.160010 -2.323726  
C -3.477358 1.777782 -2.008172  
H -4.325799 2.464595 -2.092773  
H -3.012446 1.738223 -3.000533  
N -2.161822 0.508780 1.746731  
N -2.868189 -2.146946 0.820688  
N -3.030629 -0.699680 -1.600155  
H 2.133600 -0.990178 2.182609  
H 2.472453 -2.900492 -1.502349  
H 1.760567 0.556663 -2.350217  
Cu 1.472141 -0.362341 -0.123114  
S 2.023390 2.154229 1.220886  
C 3.130610 2.672744 -0.160624  
H 3.209909 3.763370 -0.150384  
H 4.132131 2.271319 0.019239  
C 2.582822 2.223675 -1.515413  
H 1.574994 2.628990 -1.652941  
H 3.209984 2.651584 -2.310147  
C 3.739131 0.105620 -2.156065  
H 4.524215 0.250061 -1.406642  
H 4.089336 0.581511 -3.082593  
C 3.489110 -1.380850 -2.417885  
H 2.746750 -1.487143 -3.217756  
H 4.418806 -1.844746 -2.778282  
C 3.975999 -2.384685 -0.204333  
H 4.819820 -1.696598 -0.316300  
H 4.381986 -3.394857 -0.347048  
C 3.396294 -2.266972 1.204514  
H 2.576261 -2.983261 1.325981  
H 4.160924 -2.522044 1.950524  
C 3.853393 0.078487 1.893156  
H 4.537597 0.272472 1.061655  
H 4.460320 -0.334853 2.712491  
C 3.210809 1.374600 2.385693  
H 3.988120 2.098131 2.649329  
H 2.627273 1.194296 3.296131  
N 2.499087 0.750503 -1.670745  
N 2.951827 -2.049415 -1.215602  
N 2.844625 -0.910455 1.453407  
O 0.093613 -1.378555 0.977401  
O -0.151739 0.031940 -1.230097  
H 0.254083 -2.334115 0.924377  
H -0.426765 0.970587 -1.186497

[Cu<sub>2</sub><sup>II</sup>(L<sup>3</sup>)<sub>2</sub>(μ-OH)<sub>2</sub>]<sup>2+</sup>

H -2.564422 -3.071024 0.185978  
H -0.775684 -0.351675 2.202335  
Cu -1.515211 -0.796312 -0.245780  
S -2.120838 2.702421 -0.202770  
C -2.631647 2.382655 1.541712  
H -2.688037 3.344033 2.061011  
H -3.638787 1.955541 1.556133

C -1.635027 1.486657 2.285537  
H -0.617733 1.851386 2.112367  
H -1.829172 1.584134 3.364899  
C -2.752867 -0.709613 2.530450  
H -3.699343 -0.200926 2.319988  
H -2.649193 -0.740097 3.625067  
C -2.778539 -2.141501 1.998411  
H -1.839077 -2.644678 2.245173  
H -3.597117 -2.705373 2.463414  
C -4.300460 -1.998709 0.021465  
H -4.770917 -1.207413 0.609209  
H -4.875791 -2.916661 0.202731  
C -4.335607 -1.649958 -1.464453  
H -3.923863 -2.458572 -2.078519  
H -5.364113 -1.483063 -1.799587  
C -4.361889 1.163806 -1.127959  
H -4.648869 0.879052 -0.112183  
H -5.273099 1.210152 -1.735350  
C -3.685724 2.535199 -1.143757  
H -4.407107 3.274813 -0.779359  
H -3.422309 2.827895 -2.165452  
N -1.660100 0.055950 1.892457  
N -2.903817 -2.164097 0.509879  
H 2.591562 -3.076043 -0.238068  
H 2.145694 -0.344959 -2.878102  
Cu 1.482981 -0.778572 -0.547064  
S 2.082283 2.686606 0.033188  
C 3.395708 2.310124 -1.205548  
H 3.771585 3.256560 -1.605474  
H 4.237229 1.818055 -0.709410  
C 2.865771 1.476273 -2.376149  
H 1.885046 1.845822 -2.688753  
H 3.545800 1.604633 -3.230183  
C 4.004727 -0.726165 -2.113825  
H 4.694172 -0.211688 -1.439279  
H 4.464517 -0.717385 -3.110813  
C 3.779292 -2.165573 -1.655545  
H 3.157224 -2.700147 -2.382474  
H 4.736228 -2.698916 -1.589595  
C 3.951043 -1.985975 0.825858  
H 4.653500 -1.183151 0.589260  
H 4.547558 -2.894927 0.985441  
C 3.177087 -1.654755 2.101859  
H 2.455210 -2.442160 2.341823  
H 3.867807 -1.576699 2.947176  
C 3.501296 1.173794 2.022291  
H 4.321584 0.876064 1.362340  
H 3.896185 1.218373 3.043123  
C 2.967165 2.555990 1.636444  
H 3.795937 3.271845 1.656340  
H 2.235139 2.904584 2.372703  
N 2.715481 0.013889 -2.107533  
N 3.057764 -2.175490 -0.351070  
O 0.084951 -2.015844 0.246983  
O -0.103785 0.174660 -1.171950  
H 0.060388 -2.877946 -0.198366  
H -0.156594 1.114399 -0.919873  
S -3.312228 -0.170252 -1.862015  
S 2.184340 -0.116147 1.965326

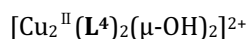

H -2.044807 -0.096072 -2.396146  
H -2.046923 -0.607191 2.359358  
Cu -1.494280 -0.334611 -0.018582  
S -2.617754 2.323825 -0.323138  
C -3.716283 2.028046 1.128568  
H -3.949863 2.997983 1.576724  
H -4.659785 1.599538 0.778306  
C -3.043559 1.148717 2.180155  
H -2.086558 1.592886 2.471687  
H -3.677318 1.121845 3.078052  
C -3.930255 -1.145419 1.768436  
H -4.611319 -0.877347 0.955665  
H -4.483364 -1.002390 2.708220  
C -3.526044 -2.617405 1.677590  
H -2.969897 -2.919530 2.573023  
H -4.420453 -3.246512 1.639975  
C -3.526480 -2.846478 -1.181597  
H -4.500977 -2.486346 -0.838939  
H -3.685279 -3.831535 -1.629394  
C -2.912065 -1.920456 -2.228388  
H -1.922717 -2.292560 -2.512565  
H -3.538554 -1.940179 -3.131523  
C -3.968944 0.301445 -1.826382  
H -4.637221 -0.016419 -1.021033  
H -4.500365 0.119243 -2.771996  
C -3.674813 1.799039 -1.732272  
H -4.613933 2.359886 -1.705634  
H -3.133148 2.140849 -2.622287  
N -2.758232 -0.239783 1.723785  
N -2.734377 -0.515511 -1.768869  
H 2.089806 -0.100084 2.356240  
H 2.069201 -0.323251 -2.404815  
Cu 1.538605 -0.226879 -0.020999  
S 2.435582 2.455492 0.397161  
C 3.590419 2.325974 -1.036252  
H 3.767690 3.333264 -1.423619  
H 4.553131 1.940642 -0.687723  
C 3.006284 1.461970 -2.152865  
H 2.041387 1.873579 -2.465668  
H 3.671285 1.512156 -3.026318  
C 3.984357 -0.811913 -1.880977  
H 4.669217 -0.564168 -1.064266  
H 4.516316 -0.596361 -2.819284  
C 3.629212 -2.298230 -1.868605  
H 3.043204 -2.561421 -2.756999  
H 4.542410 -2.899781 -1.905273  
C 3.755811 -2.650652 0.965926  
H 4.687226 -2.204932 0.605032  
H 4.002150 -3.644120 1.351253  
C 3.131561 -1.825142 2.089999  
H 2.198237 -2.296738 2.413792  
H 3.809004 -1.832626 2.955236  
C 3.963451 0.504607 1.804809  
H 4.648807 0.300307 0.976840  
H 4.521640 0.320451 2.734385  
C 3.517574 1.965877 1.799684  
H 4.392051 2.622907 1.825715  
H 2.927019 2.191797 2.695317  
N 2.779907 0.044021 -1.768158

N 2.812081 -0.423871 1.708996  
O 0.033065 -0.639539 1.255832  
O 0.005487 0.089145 -1.290829  
H 0.042678 -1.604312 1.382877  
H -0.056471 1.053746 -1.404370  
S -2.418894 -3.057619 0.278603  
S 2.595926 -2.854535 -0.454122

[Cu<sub>2</sub><sup>II</sup>(L<sup>5</sup>)<sub>2</sub>(μ-OH)<sub>2</sub>]<sup>2+</sup>

H -2.457607 -0.586439 -2.286068  
Cu -1.493605 -0.823805 0.020270  
S -2.359610 2.620901 -0.711378  
C -3.368814 2.832014 0.818417  
H -3.598639 3.897976 0.921340  
H -4.321851 2.312861 0.685624  
C -2.656391 2.373986 2.093218  
H -1.710698 2.911167 2.217949  
H -3.272713 2.615965 2.966591  
C -3.769449 -0.246794 2.558163  
H -4.524928 0.030192 1.815588  
H -4.137310 0.065191 3.542036  
C -3.556805 -1.760887 2.596251  
H -2.835171 -2.034617 3.372192  
H -4.496197 -2.272642 2.828756  
C -4.252235 -2.465202 -0.160178  
H -5.014615 -1.768954 0.199244  
H -4.706218 -3.457208 -0.231612  
C -3.683904 -2.045296 -1.516486  
H -2.926289 -2.764400 -1.845994  
H -4.489918 -2.057292 -2.263108  
C -4.054247 0.394051 -1.448089  
H -4.518614 0.425727 -0.459077  
H -4.849881 0.137284 -2.163339  
C -3.533623 1.776622 -1.842164  
H -4.399376 2.429849 -1.992308  
H -3.010388 1.734855 -2.804909  
N -3.042377 -0.700512 -1.454765  
H 2.145515 -0.998951 2.023778  
Cu 1.464891 -0.377543 -0.205837  
S 2.122316 2.161449 0.964645  
C 3.363315 2.742536 -0.271545  
H 3.512520 3.817338 -0.126339  
H 4.317574 2.248306 -0.069434  
C 2.915473 2.504273 -1.715816  
H 1.985613 3.041628 -1.928667  
H 3.670015 2.892430 -2.408660  
C 4.214967 0.010263 -2.406917  
H 4.820697 0.137868 -1.504780  
H 4.718519 0.527254 -3.231285  
C 4.040875 -1.468106 -2.769726  
H 3.509963 -1.569474 -3.721448  
H 5.023186 -1.933999 -2.897248  
C 4.192051 -2.557579 -0.129624  
H 5.008710 -1.841973 -0.262128  
H 4.638868 -3.555407 -0.095570  
C 3.439272 -2.312558 1.176739  
H 2.605136 -3.016316 1.259608  
H 4.114236 -2.518488 2.019186  
C 3.872594 0.064371 1.750963  
H 4.573426 0.246937 0.930645

H 4.461632 -0.333901 2.590342  
C 3.212906 1.363599 2.209250  
H 3.977540 2.078476 2.527612  
H 2.566539 1.184825 3.076327  
N 2.876939 -0.940901 1.310223  
O 0.175900 -1.473669 0.902140  
O -0.217749 0.117493 -1.132740  
H 0.269194 -2.427426 0.739723  
H -0.436646 1.062684 -1.023396  
S -2.174286 0.603914 2.214352  
S -2.874506 -2.546279 1.067758  
S 2.554650 0.765668 -2.181805  
S 3.058413 -2.470894 -1.579941

[Cu<sub>2</sub><sup>II</sup>(L<sup>6</sup>)<sub>2</sub>(μ-OH)<sub>2</sub>]<sup>2+</sup>

H -1.737148 -0.522856 -2.333571  
H -2.122730 0.386828 2.516668  
Cu -1.525067 0.408721 0.095402  
S -3.012558 2.157623 -0.797334  
C -4.283427 1.997628 0.533728  
H -4.819601 2.947113 0.613614  
H -5.003566 1.226255 0.247554  
C -3.586366 1.671209 1.854142  
H -2.876746 2.465588 2.107769  
H -4.333077 1.631080 2.658817  
C -3.698415 -0.801653 1.979222  
H -4.438028 -0.824921 1.174024  
H -4.252275 -0.697944 2.923465  
C -2.910638 -2.110708 2.021930  
H -2.170739 -2.085134 2.829090  
H -3.600621 -2.937883 2.234104  
C -2.934693 -2.866471 -0.277913  
H -3.993197 -2.597301 -0.172413  
H -2.871192 -3.962020 -0.286367  
C -2.356331 -2.311966 -1.573171  
H -1.298119 -2.587417 -1.630949  
H -2.868389 -2.791327 -2.421345  
C -3.746433 -0.305324 -2.050367  
H -4.482403 -0.591105 -1.291687  
H -4.093327 -0.735711 -3.003518  
C -3.716034 1.215083 -2.219686  
H -4.716312 1.605823 -2.428328  
H -3.076977 1.503399 -3.061684  
N -2.828262 0.389998 1.776729  
N -2.431368 -0.834768 -1.653150  
H 1.959542 -0.606785 2.285859  
H 1.962524 0.457038 -2.370609  
Cu 1.470673 0.065290 0.002535  
S 2.781728 2.314229 0.977211  
C 3.951877 2.329710 -0.449396  
H 4.328898 3.348927 -0.572017  
H 4.810182 1.693535 -0.215277  
C 3.263231 1.894384 -1.744223  
H 2.418083 2.560530 -1.946896  
H 3.968115 2.013643 -2.578718  
C 3.729556 -0.527337 -2.102648  
H 4.550673 -0.518230 -1.378982  
H 4.163426 -0.296582 -3.086438  
C 3.061628 -1.901192 -2.159688  
H 2.274762 -1.912449 -2.921885

H 3.795737 -2.670315 -2.430140  
C 3.282003 -2.729759 0.089956  
H 4.306362 -2.364563 -0.056447  
H 3.307942 -3.825711 0.041603  
C 2.735954 -2.289346 1.438538  
H 1.726885 -2.691736 1.566636  
H 3.362556 -2.700079 2.241839  
C 3.914692 -0.136883 1.890576  
H 4.603511 -0.250020 1.048208  
H 4.384498 -0.628517 2.755253  
C 3.706624 1.338443 2.231845  
H 4.671527 1.817805 2.421927  
H 3.115028 1.444358 3.148546  
N 2.740779 0.503956 -1.709710  
N 2.640161 -0.808799 1.550038  
O -0.086347 -0.467202 1.150360  
O 0.003859 0.844861 -1.135971  
H -0.342928 -1.403088 1.043836  
H 0.094285 1.809135 -1.210833  
O -2.177206 -2.352435 0.824602  
O 2.414069 -2.219338 -0.926910

[Cu<sub>2</sub><sup>I</sup>(L<sup>1</sup>)<sub>2</sub>(μ-OH)]<sup>+</sup>

H -2.242334 2.748051 -1.169499  
H -2.957258 -0.696958 -3.016211  
H -2.332657 -2.395464 0.391382  
Cu -1.890705 0.158051 -0.432981  
C -3.585960 0.072255 2.219066  
H -3.754830 0.220723 3.298726  
H -4.539134 0.286678 1.724428  
C -3.194644 -1.391060 1.964821  
H -2.236139 -1.594754 2.457530  
H -3.944930 -2.048027 2.436788  
C -4.246915 -1.964972 -0.211029  
H -5.010851 -1.234958 0.079175  
H -4.660147 -2.958975 0.032667  
C -4.007948 -1.891921 -1.726476  
H -3.271468 -2.654846 -2.006898  
H -4.948303 -2.148262 -2.243721  
C -4.440689 0.497235 -2.272244  
H -5.144255 0.427880 -1.435913  
H -5.044619 0.423974 -3.192475  
C -3.742051 1.864092 -2.246508  
H -3.028355 1.916920 -3.077234  
H -4.492457 2.654524 -2.412590  
C -3.791916 2.522088 0.143664  
H -4.699823 1.910813 0.175396  
H -4.122314 3.568429 0.036024  
C -3.023086 2.373338 1.463704  
H -3.655084 2.748675 2.286106  
H -2.129530 3.009095 1.431803  
N -3.022866 -1.662184 0.533866  
N -3.467795 -0.590850 -2.142851  
N -2.983469 2.071459 -0.999343  
H 1.701698 -1.265991 2.490875  
H 2.733672 -2.797468 -0.948525  
H 2.944492 0.782632 -2.539732  
Cu 1.896046 -0.251541 -0.110247  
C 3.863451 2.126423 0.362245  
H 4.121631 3.153011 0.671985

H 4.696203 1.488800 0.677460  
 C 3.731276 2.084388 -1.166703  
 H 2.899017 2.730518 -1.471442  
 H 4.647340 2.507854 -1.612360  
 C 4.593929 -0.164233 -1.780500  
 H 5.231481 -0.022913 -0.901187  
 H 5.218299 0.072462 -2.658476  
 C 4.151514 -1.632507 -1.864863  
 H 3.523745 -1.766192 -2.754363  
 H 5.044164 -2.265347 -2.004237  
 C 4.121075 -2.393382 0.499012  
 H 4.916412 -1.651644 0.630065  
 H 4.621256 -3.372028 0.402913  
 C 3.223040 -2.416198 1.743708  
 H 2.434608 -3.164851 1.600435  
 H 3.823003 -2.740514 2.610424  
 C 3.379732 -0.102672 2.637760  
 H 4.385380 -0.138243 2.206321  
 H 3.496994 -0.293364 3.717717  
 C 2.784800 1.299301 2.440049  
 H 3.403481 2.030329 2.987051  
 H 1.783629 1.328121 2.887524  
 N 3.437974 0.729726 -1.651889  
 N 3.353796 -2.031167 -0.697050  
 N 2.562450 -1.121255 1.968660  
 O -0.000231 -0.455886 -0.765892  
 H 0.050457 -0.740047 -1.689594  
 N -2.575199 0.990365 1.677244  
 H -1.753295 0.982640 2.275878  
 N 2.642581 1.634612 1.015146  
 H 1.898221 2.317653 0.895720

[Cu<sub>2</sub><sup>I</sup>(L<sup>2</sup>)<sub>2</sub>(μ-OH)]<sup>+</sup>

H -1.474937 2.317756 -0.756389  
 H -3.050038 -0.608108 -3.039870  
 H -2.735187 -2.736632 0.071763  
 Cu -1.734383 -0.329882 -0.503823  
 S -1.735844 0.390402 2.131073  
 C -3.310658 -0.503155 2.475385  
 H -3.456751 -0.577747 3.557536  
 H -4.141556 0.079562 2.065657  
 C -3.278483 -1.911330 1.862890  
 H -2.397319 -2.445496 2.235080  
 H -4.162584 -2.461875 2.226549  
 C -4.507697 -1.775799 -0.280735  
 H -5.026119 -0.903763 0.134311  
 H -5.159544 -2.645975 -0.093478  
 C -4.333430 -1.611417 -1.796079  
 H -3.842799 -2.506971 -2.196538  
 H -5.331394 -1.557647 -2.262208  
 C -4.148087 0.850253 -2.113799  
 H -4.861247 0.860608 -1.282917  
 H -4.732947 1.044254 -3.027677  
 C -3.122307 1.976834 -1.929402  
 H -2.400826 1.944233 -2.753920  
 H -3.639517 2.948774 -1.985276  
 C -3.073402 2.327730 0.512747  
 H -4.038822 1.814873 0.575192  
 H -3.296107 3.406111 0.429243  
 C -2.285048 2.114473 1.807624

H -2.866571 2.482724 2.659038  
H -1.352773 2.691412 1.782679  
N -3.209700 -1.895952 0.395590  
N -3.486556 -0.459030 -2.133489  
N -2.364118 1.827092 -0.672404  
H 1.213889 -0.929713 2.048177  
H 3.032988 -2.901785 -0.927308  
H 3.111564 0.404845 -2.738444  
Cu 1.795505 -0.389345 -0.542439  
S 1.716748 2.084290 0.522394  
C 3.367624 2.525175 -0.165917  
H 3.506497 3.609664 -0.114676  
H 4.140890 2.062433 0.454702  
C 3.494379 2.069375 -1.626471  
H 2.680862 2.510341 -2.213101  
H 4.437699 2.473893 -2.029700  
C 4.692843 -0.097848 -1.554218  
H 5.071841 0.204773 -0.571779  
H 5.461584 0.185756 -2.291867  
C 4.497995 -1.619672 -1.592865  
H 4.133095 -1.907940 -2.586553  
H 5.479297 -2.105138 -1.460973  
C 3.995585 -2.246155 0.761680  
H 4.741551 -1.470151 0.965178  
H 4.508319 -3.212196 0.900221  
C 2.847010 -2.141253 1.774404  
H 2.100283 -2.910481 1.547165  
H 3.239004 -2.351028 2.783945  
C 2.844590 0.251361 2.403912  
H 3.861985 0.336917 2.006594  
H 2.947373 0.051179 3.485938  
C 2.108934 1.586437 2.249697  
H 2.673162 2.384604 2.742900  
H 1.130160 1.533837 2.740218  
N 3.420003 0.606818 -1.788861  
N 3.505185 -2.060222 -0.607756  
N 2.166815 -0.838877 1.700232  
O 0.009598 -1.176747 -1.028612  
H -0.009284 -1.468266 -1.950664

[Cu<sub>2</sub>(L<sup>3</sup>)<sub>2</sub>(μ-OH)]<sup>+</sup>

H 2.174034 -1.206405 2.365990  
H 0.822244 -2.166355 -1.168729  
Cu 1.629476 0.145624 0.187807  
S 2.441730 1.241164 -1.809588  
C 3.130849 -0.259923 -2.631570  
H 3.360011 -0.028709 -3.676689  
H 4.064146 -0.543276 -2.134072  
C 2.109734 -1.405587 -2.568870  
H 1.189656 -1.094724 -3.076285  
H 2.517136 -2.257913 -3.137510  
C 2.697485 -2.702695 -0.537838  
H 3.717542 -2.384017 -0.779283  
H 2.591922 -3.733731 -0.913216  
C 2.504115 -2.691566 0.983871  
H 1.465087 -2.954242 1.213852  
H 3.142621 -3.469372 1.434365  
C 4.165521 -1.096196 1.875919  
H 4.761882 -1.252419 0.969717  
H 4.557764 -1.804329 2.628264



C 4.393356 0.319477 2.417935  
H 3.887272 0.440947 3.383277  
H 5.462089 0.473886 2.600524  
C 4.734476 1.597296 -0.126765  
H 5.017617 0.555174 -0.300555  
H 5.655285 2.178118 -0.000005  
C 3.967855 2.154153 -1.331402  
H 4.629374 2.198768 -2.203563  
H 3.628390 3.176806 -1.136042  
N 1.761941 -1.774944 -1.189995  
N 2.763449 -1.360059 1.549730  
H -2.083400 -0.998734 2.460797  
H -2.782636 2.756803 1.630424  
Cu -1.675677 0.427610 0.335135  
S -2.440644 1.115466 -1.826265  
C -4.040707 1.891915 -1.332821  
H -4.432154 2.470190 -2.175594  
H -4.761933 1.102946 -1.096936  
C -3.828662 2.818136 -0.126884  
H -3.115292 3.604391 -0.397012  
H -4.788565 3.315696 0.090311  
C -4.288435 1.388392 1.852053  
H -4.985123 0.884405 1.172927  
H -4.891942 2.071971 2.471307  
C -3.608937 0.349934 2.753512  
H -2.861462 0.852403 3.378188  
H -4.359101 -0.083776 3.434764  
C -3.750245 -1.814674 1.574107  
H -4.617807 -1.428219 1.027077  
H -4.155337 -2.357050 2.447775  
C -3.001101 -2.839531 0.715129  
H -2.204840 -3.314479 1.300593  
H -3.687182 -3.635388 0.407401  
C -3.482347 -1.556595 -1.815768  
H -4.310123 -1.237521 -1.175929  
H -3.847590 -2.366372 -2.457468  
C -3.009963 -0.399550 -2.703751  
H -3.809605 -0.116307 -3.396944  
H -2.155237 -0.706469 -3.315882  
N -3.293863 2.104242 1.040317  
N -2.914945 -0.680294 1.965697  
O 0.026785 0.337751 1.406582  
H 0.155114 1.172242 1.881536  
S 3.728212 1.702453 1.408866  
S -2.116696 -2.182913 -0.755311

[Cu<sub>2</sub>(L<sup>4</sup>)<sub>2</sub>(μ-OH)]<sup>+</sup>

H 2.696935 0.266473 -2.699413  
H 1.840940 0.586220 2.202064  
Cu 1.844416 0.590185 -0.301273  
S 1.806156 -2.212083 -0.462502  
C 2.747787 -2.416232 1.112533  
H 2.599757 -3.438288 1.475315  
H 3.814347 -2.294822 0.898139  
C 2.281222 -1.416229 2.180971  
H 1.198105 -1.508159 2.311391  
H 2.746193 -1.705394 3.139582  
C 3.900185 0.453334 2.223679  
H 4.651711 -0.081372 1.628347  
H 4.127708 0.226365 3.281512

C 4.067609 1.966755 2.047004  
H 3.423057 2.499663 2.756335  
H 5.098507 2.250419 2.282821  
C 4.826171 1.989547 -0.741667  
H 5.377053 1.183216 -0.248137  
H 5.551983 2.768570 -0.995352  
C 4.166519 1.503669 -2.037791  
H 3.559646 2.311143 -2.460245  
H 4.961818 1.275805 -2.765750  
C 4.025551 -0.939511 -1.736025  
H 4.607254 -0.899623 -0.810212  
H 4.747264 -1.048156 -2.563087  
C 3.124914 -2.176311 -1.737430  
H 3.744663 -3.074803 -1.651244  
H 2.586010 -2.256599 -2.689564  
N 2.572304 -0.022317 1.835341  
N 3.276133 0.329128 -1.861591  
H -1.373615 -1.532369 -1.400248  
H -2.887152 1.932695 2.246967  
Cu -1.698393 0.341691 0.440942  
S -3.014147 1.479845 -1.653049  
C -4.536580 1.760522 -0.654971  
H -5.189306 2.463431 -1.182017  
H -5.079797 0.815917 -0.554318  
C -4.180616 2.337210 0.721325  
H -3.565564 3.233757 0.588247  
H -5.113803 2.657422 1.213555  
C -4.268669 0.433600 2.288504  
H -4.810955 -0.168298 1.550772  
H -5.033122 0.943538 2.900701  
C -3.461314 -0.474627 3.219605  
H -2.987737 0.116650 4.012581  
H -4.129003 -1.188452 3.712601  
C -2.912659 -2.602386 1.360729  
H -3.946884 -2.281205 1.203969  
H -2.940386 -3.572140 1.867352  
C -2.174678 -2.749975 0.024334  
H -1.128876 -3.014428 0.210755  
H -2.626011 -3.591875 -0.526245  
C -3.400514 -1.354890 -1.596121  
H -4.259447 -1.301138 -0.918085  
H -3.568843 -2.232047 -2.245314  
C -3.360951 -0.115232 -2.493050  
H -4.297209 -0.041449 -3.056076  
H -2.555506 -0.204799 -3.232090  
N -3.423525 1.395621 1.566783  
N -2.184785 -1.515959 -0.783142  
O 0.123594 1.213049 0.491986  
H 0.007013 2.140282 0.238888  
S -2.061768 -1.376202 2.440729  
S 3.585845 2.686410 0.425662

[Cu<sub>2</sub><sup>I</sup>(L<sup>5</sup>)<sub>2</sub>(μ-OH)]<sup>+</sup>

H -1.188217 1.575713 -0.934745  
Cu -1.846564 -0.682836 0.082448  
S -2.045284 0.891229 2.249613  
C -3.769831 0.390486 2.664079  
H -4.026855 0.785842 3.652956  
H -4.451891 0.841616 1.937585  
C -3.928965 -1.134046 2.686971

H -3.245399 -1.583094 3.415179  
 H -4.946040 -1.393512 3.001446  
 C -5.060656 -1.591561 0.112798  
 H -5.237954 -0.512226 0.152694  
 H -5.924901 -2.096193 0.560195  
 C -4.905251 -2.066642 -1.335796  
 H -4.784134 -3.154721 -1.368158  
 H -5.820824 -1.831011 -1.889298  
 C -3.883886 0.356242 -2.498483  
 H -4.681741 0.634305 -1.802414  
 H -4.273279 0.488745 -3.512864  
 C -2.654943 1.255538 -2.314593  
 H -1.830946 0.870291 -2.924192  
 H -2.902705 2.257850 -2.702544  
 C -2.906349 2.297428 -0.090379  
 H -3.950046 1.971159 -0.019405  
 H -2.923336 3.300796 -0.551761  
 C -2.300614 2.449343 1.308024  
 H -2.908000 3.139007 1.903008  
 H -1.294835 2.880510 1.245311  
 N -2.177955 1.330095 -0.921116  
 H 1.459561 -1.434846 1.520300  
 Cu 1.812851 -0.227838 -0.624809  
 S 1.734121 1.899464 1.218513  
 C 3.369198 2.531319 0.663676  
 H 3.580145 3.483339 1.163400  
 H 4.144497 1.819330 0.959986  
 C 3.390601 2.755926 -0.852387  
 H 2.585655 3.433589 -1.155717  
 H 4.333794 3.230411 -1.144811  
 C 4.828722 0.474584 -1.746706  
 H 5.135004 0.477569 -0.696021  
 H 5.541511 1.085717 -2.312153  
 C 4.833475 -0.947723 -2.314625  
 H 4.579678 -0.935050 -3.379980  
 H 5.844602 -1.360939 -2.231741  
 C 4.307926 -2.388240 0.123472  
 H 4.973441 -1.558659 0.383414  
 H 4.901752 -3.307763 0.128953  
 C 3.164788 -2.505242 1.141160  
 H 2.441649 -3.248820 0.789853  
 H 3.582508 -2.888431 2.086749  
 C 3.002055 -0.391116 2.404192  
 H 4.023832 -0.109728 2.120966  
 H 3.087505 -0.931462 3.364267  
 C 2.161246 0.861162 2.674361  
 H 2.656238 1.479400 3.430272  
 H 1.181458 0.582150 3.079177  
 N 2.445846 -1.238386 1.347717  
 O 0.028645 -1.129562 -0.481928  
 H -0.027770 -1.844179 -1.132662  
 S -3.564745 -2.004016 1.108631  
 S -3.453442 -1.419887 -2.254992  
 S 3.161025 1.253134 -1.890893  
 S 3.633523 -2.122685 -1.572828

[Cu<sub>2</sub><sup>I</sup>(L<sup>6</sup>)<sub>2</sub>(μ-OH)]<sup>+</sup>

H 3.081724 0.244667 -2.712021  
 H 1.411801 0.651683 1.946239  
 Cu 1.784361 0.422784 -0.513215

S 1.865584 -2.225849 -0.509740  
C 2.608673 -2.337631 1.179471  
H 2.463868 -3.354479 1.557732  
H 3.686220 -2.164329 1.097171  
C 1.960031 -1.324572 2.137526  
H 0.875393 -1.476842 2.141972  
H 2.322729 -1.543692 3.156595  
C 3.441455 0.656896 2.306506  
H 4.296031 0.038828 2.003491  
H 3.444033 0.667377 3.411967  
C 3.630230 2.101861 1.827052  
H 2.808911 2.725613 2.195827  
H 4.567628 2.505753 2.237974  
C 4.759342 1.853107 -0.291301  
H 5.263102 1.017481 0.213397  
H 5.474862 2.688140 -0.335818  
C 4.364488 1.469074 -1.713767  
H 3.812547 2.302659 -2.158497  
H 5.280965 1.313084 -2.304832  
C 4.219330 -0.992224 -1.559198  
H 4.701657 -0.937991 -0.579125  
H 5.024025 -1.110255 -2.303944  
C 3.324677 -2.232069 -1.627911  
H 3.928186 -3.126756 -1.443171  
H 2.892837 -2.342627 -2.629986  
N 2.222478 0.064823 1.752873  
N 3.484115 0.272481 -1.774567  
H -1.821148 -1.624826 -1.901725  
H -2.237448 1.808028 1.839984  
Cu -1.682357 0.407508 -0.322868  
S -3.506450 1.436797 -1.799981  
C -4.688121 1.743483 -0.412941  
H -5.431312 2.476699 -0.741084  
H -5.218291 0.813318 -0.186252  
C -3.955998 2.275479 0.827955  
H -3.399786 3.178985 0.555870  
H -4.714326 2.577681 1.569511  
C -3.587791 0.356729 2.343206  
H -4.410442 -0.168846 1.844869  
H -4.028772 0.863003 3.220461  
C -2.548918 -0.646931 2.853769  
H -1.745518 -0.115945 3.376841  
H -3.023586 -1.327014 3.576966  
C -2.661644 -2.429778 1.237593  
H -3.733457 -2.191021 1.250284  
H -2.526192 -3.356546 1.815449  
C -2.176095 -2.660765 -0.188937  
H -1.097168 -2.839942 -0.169549  
H -2.661741 -3.570207 -0.579371  
C -3.812694 -1.391212 -1.536989  
H -4.451433 -1.309244 -0.652182  
H -4.129419 -2.302051 -2.072794  
C -4.047741 -0.192557 -2.459269  
H -5.105401 -0.144281 -2.737840  
H -3.479302 -0.303000 -3.390492  
N -3.001510 1.306906 1.389710  
N -2.413694 -1.500866 -1.080594  
O 0.072422 1.295088 0.007569  
H 0.049333 2.185565 -0.371107  
O 3.591905 2.246239 0.411934

O -1.900634 -1.378710 1.819319

1-O-RC

H 0.322006 -1.867679 1.941905  
H 1.718701 1.713774 0.962724  
H -0.403087 1.574156 -2.356945  
Cu 0.139424 -0.245429 -0.328136  
C -2.814504 -0.239072 -0.943346  
H -3.771524 -0.637498 -1.314013  
H -3.041327 0.312730 -0.025225  
C -2.229622 0.716524 -1.993269  
H -2.021812 0.157869 -2.913456  
H -2.984884 1.478057 -2.242642  
C -1.093198 2.486485 -0.659254  
H -1.879675 2.269983 0.071308  
H -1.413412 3.386882 -1.206307  
C 0.224966 2.789503 0.067832  
H 0.996161 3.034345 -0.671983  
H 0.087330 3.682559 0.697248  
C 0.087804 1.452705 2.166857  
H -0.986336 1.639228 2.064885  
H 0.462607 2.180141 2.903470  
C 0.322274 0.033382 2.704641  
H 1.399429 -0.133861 2.822293  
H -0.127729 -0.048382 3.706243  
C -1.632280 -1.270440 1.879507  
H -2.151262 -0.309928 1.962092  
H -1.885280 -1.842545 2.785508  
C -2.143099 -2.034200 0.649401  
H -3.217230 -2.239271 0.778743  
H -1.636022 -3.004620 0.591061  
N -0.958479 1.315766 -1.543504  
N 0.711030 1.629844 0.842729  
N -0.185995 -1.000095 1.779674  
O 1.847883 -0.991419 -1.513963  
H 1.822058 -1.797634 -2.053325  
H 2.761308 -0.909303 -1.193333  
O 5.762740 -0.234011 -0.143261  
O 4.553006 -0.171853 -0.058253  
N -1.859873 -1.312422 -0.607138  
H -1.838239 -1.982486 -1.373602

1-O-TS1

H 1.606495 1.927713 0.757489  
H -1.420685 1.899311 -1.824738  
H -1.515087 -1.993632 -1.456984  
Cu 0.241498 -0.050235 -0.530735  
C -0.515181 -1.968718 1.716462  
H -0.340502 -2.762659 2.458402  
H -1.185624 -1.243041 2.188683  
C -1.192366 -2.575335 0.480161  
H -0.519140 -3.309874 0.023346  
H -2.096695 -3.118203 0.795851  
C -2.724295 -0.784695 -0.330244  
H -2.770398 -0.498725 0.725912  
H -3.625411 -1.384497 -0.531782  
C -2.754718 0.469807 -1.214330  
H -2.747725 0.167321 -2.268483  
H -3.700761 1.006026 -1.042070  
C -1.662247 2.223332 0.177630

H -2.114674 1.660820 1.000688  
H -2.317451 3.088242 -0.006631  
C -0.272887 2.726217 0.590696  
H 0.164636 3.301621 -0.233441  
H -0.376373 3.411937 1.445168  
C 0.519084 1.045677 2.247612  
H -0.547655 0.928601 2.464412  
H 0.923422 1.726370 3.011689  
C 1.228203 -0.311379 2.356804  
H 1.114605 -0.690682 3.383817  
H 2.300944 -0.175882 2.181868  
N -1.484525 -1.550132 -0.540648  
N -1.575789 1.331432 -0.993716  
N 0.648148 1.608769 0.888313  
N 0.730276 -1.269027 1.350078  
H 1.454702 -1.958901 1.159928  
O 3.161367 0.114721 -0.392953  
O 3.758988 -0.249681 -1.401139  
O 1.084806 -0.626976 -2.461237  
H 2.055247 -0.651227 -2.549522  
H 0.747660 -0.280564 -3.302862

#### 1-O-IM

H 1.579624 1.985818 -0.762005  
H -1.690216 0.496024 -2.376868  
H -1.309450 -2.335401 0.210733  
Cu 0.346599 -0.386450 -0.411088  
C -0.017158 -0.482960 2.624212  
H 0.317675 -0.682600 3.652388  
H -0.674381 0.391450 2.670430  
C -0.795529 -1.689976 2.090639  
H -0.138794 -2.567103 2.068498  
H -1.627197 -1.925262 2.770422  
C -2.559178 -0.758264 0.590499  
H -2.547558 0.106401 1.262421  
H -3.394319 -1.397389 0.913534  
C -2.801802 -0.305533 -0.854900  
H -2.876292 -1.187860 -1.501949  
H -3.771285 0.213129 -0.909218  
C -1.731271 1.934339 -0.927050  
H -2.040291 1.961593 0.123039  
H -2.477144 2.517759 -1.487320  
C -0.354855 2.590186 -1.077554  
H -0.056487 2.573344 -2.132129  
H -0.418813 3.646477 -0.777034  
C 0.793467 2.233455 1.107523  
H -0.214002 2.281550 1.534728  
H 1.236628 3.232531 1.232845  
C 1.648142 1.209511 1.867271  
H 1.724946 1.514785 2.921192  
H 2.662942 1.206399 1.455224  
N -1.262421 -1.447382 0.708637  
N -1.690313 0.524505 -1.358541  
N 0.673634 1.858737 -0.312928  
N 1.111034 -0.160761 1.727729  
H 1.864847 -0.828432 1.884018  
O 2.374668 -0.219414 -1.070564  
O 2.935693 -1.249163 -1.546974  
O 0.422695 -2.204372 -1.667748  
H 1.384165 -2.296057 -1.849666

H -0.021739 -2.274857 -2.528342

#### 1-O-TS2

H 2.086326 -1.187121 1.379230  
H -0.968575 -2.479012 -0.657796  
H -2.199201 1.159441 -0.764189  
Cu -0.265361 0.034752 0.529983  
C 0.801860 2.537081 -0.801714  
H 1.173813 3.571693 -0.808909  
H 1.346914 2.000114 -1.584890  
C -0.698996 2.524767 -1.113384  
H -1.235368 3.101340 -0.351184  
H -0.881194 3.016896 -2.079436  
C -1.146070 0.392095 -2.347906  
H -0.138961 0.525497 -2.757282  
H -1.848496 0.774720 -3.102793  
C -1.430404 -1.095311 -2.099270  
H -2.460958 -1.211985 -1.744671  
H -1.353476 -1.641451 -3.051336  
C 0.809119 -2.015602 -1.558435  
H 1.146900 -1.223282 -2.234584  
H 0.789508 -2.944096 -2.147959  
C 1.804529 -2.166339 -0.401932  
H 1.483219 -2.986765 0.250205  
H 2.788927 -2.445446 -0.807294  
C 2.772206 0.110940 -0.043912  
H 2.642379 0.229681 -1.125293  
H 3.829251 -0.149919 0.118172  
C 2.472919 1.432899 0.678120  
H 3.183235 2.200460 0.337578  
H 2.629507 1.300739 1.754406  
N -1.231674 1.146379 -1.084546  
N -0.534007 -1.651246 -1.062967  
N 1.859176 -0.944728 0.416569  
N 1.069588 1.862994 0.486382  
H 0.809654 2.486494 1.250006  
O 0.089747 -0.363904 2.523959  
O -0.613530 0.380101 3.268327  
O -2.568436 -0.011575 1.299388  
H -2.433442 0.294297 2.216118  
H -3.172264 -0.769417 1.366872

#### 1-O-PC

H 2.523654 -0.513770 1.700604  
H -0.333613 -2.756111 0.157800  
H -2.311884 0.485723 -0.702287  
Cu 0.016847 -0.009921 0.604285  
C 0.447310 2.302880 -1.228610  
H 0.611326 3.352983 -1.512004  
H 1.037945 1.695242 -1.922852  
C -1.045952 1.966666 -1.373845  
H -1.629319 2.606048 -0.701085  
H -1.367163 2.201293 -2.399665  
C -1.102667 -0.417776 -2.088550  
H -0.150602 -0.176901 -2.574852  
H -1.877809 -0.359815 -2.866902  
C -1.064866 -1.848963 -1.531915  
H -2.040179 -2.085174 -1.093751  
H -0.894408 -2.554277 -2.358714  
C 1.333130 -2.224063 -0.907364

H 1.526056 -1.566142 -1.761196  
H 1.491953 -3.253458 -1.261302  
C 2.329319 -1.925580 0.224275  
H 2.140508 -2.607465 1.061325  
H 3.350703 -2.124912 -0.131825  
C 2.884999 0.493284 -0.047069  
H 2.704151 0.291216 -1.108240  
H 3.974181 0.452180 0.100242  
C 2.380911 1.899244 0.312305  
H 2.932107 2.639890 -0.286134  
H 2.605681 2.105866 1.365089  
N -1.339201 0.564674 -1.011512  
N -0.054143 -1.996730 -0.460725  
N 2.185052 -0.544608 0.740009  
N 0.918657 2.019462 0.141724  
H 0.565769 2.738671 0.770454  
O -0.810113 -0.043218 2.462000  
O -2.033843 -0.198708 2.610528  
O -4.042212 0.002031 0.103256  
H -4.057689 -0.066282 1.071850  
H -4.966740 0.112307 -0.169985

#### 2-O-RC

H 0.296773 -1.804787 1.986340  
H 1.661707 1.829887 1.047192  
H -0.336819 1.633961 -2.247495  
Cu 0.182695 -0.177121 -0.262196  
S -1.778342 -1.689090 -0.879645  
C -2.879537 -0.233609 -1.164233  
H -3.805731 -0.575191 -1.635972  
H -3.139544 0.210581 -0.198146  
C -2.192722 0.793622 -2.076626  
H -1.924561 0.311950 -3.023054  
H -2.923186 1.582378 -2.315522  
C -1.162271 2.503842 -0.592778  
H -1.949228 2.240425 0.122454  
H -1.514115 3.395903 -1.134192  
C 0.133429 2.855005 0.150258  
H 0.900422 3.138739 -0.580112  
H -0.045896 3.735262 0.786449  
C 0.032897 1.510170 2.241238  
H -1.043213 1.682894 2.136889  
H 0.395853 2.236304 2.984380  
C 0.285719 0.090049 2.763677  
H 1.364734 -0.067684 2.875421  
H -0.161345 -0.010213 3.764712  
C -1.657443 -1.216635 1.941309  
H -2.192929 -0.264196 1.874047  
H -1.910807 -1.652381 2.921966  
C -2.156026 -2.176271 0.855170  
H -3.233966 -2.332868 0.961678  
H -1.681698 -3.159024 0.961184  
N -0.959612 1.353638 -1.491415  
N 0.658555 1.708585 0.920422  
N -0.215694 -0.938379 1.827624  
O 1.864832 -0.876928 -1.500471  
H 1.731220 -1.673977 -2.038130  
H 2.799285 -0.880993 -1.233536  
O 5.961403 -0.742148 -0.637341  
O 4.806435 -0.510794 -0.342569



2-O-TS1

H 1.116139 -2.009060 1.279071  
H 2.232616 1.748957 0.498660  
H -0.813806 1.946257 -1.810516  
Cu 0.351424 -0.070949 -0.482014  
S -1.896280 -1.539414 -0.529894  
C -2.917584 -0.044981 -0.168021  
H -3.973740 -0.295295 -0.304863  
H -2.775531 0.239934 0.878901  
C -2.541213 1.108793 -1.107793  
H -2.649943 0.779129 -2.146668  
H -3.262760 1.926628 -0.956897  
C -0.972803 2.597831 0.120292  
H -1.457228 2.238429 1.035015  
H -1.462563 3.548018 -0.142968  
C 0.516846 2.862902 0.374509  
H 0.972294 3.266542 -0.537447  
H 0.616231 3.634086 1.153216  
C 1.124815 1.210234 2.133036  
H 0.092306 1.386667 2.450468  
H 1.764642 1.811725 2.795447  
C 1.477718 -0.272173 2.301670  
H 2.515531 -0.436751 1.994228  
H 1.407213 -0.543026 3.365662  
C -0.686008 -1.455481 2.064603  
H -1.171685 -0.513022 2.337351  
H -0.563914 -2.027920 2.998453  
C -1.592702 -2.264540 1.132497  
H -2.551769 -2.453926 1.624541  
H -1.150286 -3.244032 0.916013  
N -1.152664 1.573737 -0.924230  
N 1.246607 1.625204 0.721552  
N 0.620053 -1.136674 1.458948  
O 0.775275 -0.432745 -2.597412  
H 0.212645 -1.120551 -2.990565  
H 1.685501 -0.636236 -2.877836  
O 2.971198 -0.939807 -0.586830  
O 3.492892 -1.058669 -1.690909

2-O-IM

H -0.708212 -2.429895 -0.620673  
H -2.668477 1.071048 -0.655542  
H 0.364462 2.354955 1.161795  
Cu -0.423124 -0.034964 0.570459  
S 2.185031 -1.017390 0.656314  
C 2.819226 0.524441 -0.134279  
H 3.908148 0.552937 -0.033301  
H 2.585565 0.501434 -1.203130  
C 2.213529 1.763828 0.532491  
H 2.421229 1.737855 1.607500  
H 2.715617 2.658025 0.133836  
C 0.311837 2.545245 -0.872331  
H 0.797355 2.058161 -1.725043  
H 0.628110 3.598887 -0.885341  
C -1.213094 2.476551 -1.009120  
H -1.677410 3.017765 -0.176380  
H -1.518186 2.985517 -1.935206  
C -1.577814 0.341838 -2.231411  
H -0.651655 0.656362 -2.723162

H -2.398267 0.589293 -2.919721  
C -1.556307 -1.171172 -1.992101  
H -2.492422 -1.480272 -1.516268  
H -1.494082 -1.691371 -2.959099  
C 0.847350 -1.752841 -1.758232  
H 1.106481 -0.822212 -2.273666  
H 0.786884 -2.535282 -2.531675  
C 1.955787 -2.143981 -0.777086  
H 2.905264 -2.246853 -1.311367  
H 1.742680 -3.117766 -0.320772  
N 0.748086 1.856966 0.358061  
N -1.695036 1.079953 -0.955783  
N -0.449878 -1.561540 -1.089751  
O -0.374796 0.387309 2.718126  
H 0.338805 -0.056509 3.206771  
H -1.213373 0.028413 3.076437  
O -2.125588 -1.244836 1.127756  
O -2.648831 -1.051147 2.257165

#### 2-O-TS2

H 0.135029 2.496474 -1.194475  
H -2.757471 0.559345 0.639936  
H -0.499945 -2.467169 0.573417  
Cu -0.340620 -0.174352 -0.495737  
S 2.212843 -0.271149 -0.848719  
C 2.457043 -1.011091 0.827005  
H 3.483092 -1.382575 0.904034  
H 2.322985 -0.232056 1.583709  
C 1.469525 -2.163541 1.044722  
H 1.614195 -2.919099 0.265632  
H 1.697542 -2.647554 2.005473  
C -0.533648 -1.313614 2.275142  
H 0.142245 -0.594500 2.751051  
H -0.636041 -2.161631 2.967878  
C -1.913541 -0.685064 2.040306  
H -2.590140 -1.441106 1.625693  
H -2.336834 -0.363814 3.003130  
C -1.387840 1.711413 1.644123  
H -0.564833 1.498747 2.334091  
H -2.180939 2.189043 2.237383  
C -0.915515 2.681351 0.554908  
H -1.748506 2.903448 -0.121562  
H -0.621901 3.632055 1.025090  
C 1.527911 2.267415 0.282590  
H 1.535935 1.903290 1.315872  
H 1.831754 3.326496 0.321416  
C 2.565734 1.512506 -0.557361  
H 3.559399 1.609750 -0.109424  
H 2.628291 1.937455 -1.565813  
N 0.060481 -1.722360 0.989107  
N -1.840982 0.427672 1.066324  
N 0.172567 2.102395 -0.255488  
O -0.937755 -2.540198 -1.658339  
H -0.373149 -2.980737 -2.314607  
H -1.786588 -2.399749 -2.111082  
O -1.252765 0.474940 -2.216919  
O -2.402493 -0.024956 -2.305888

#### 2-O-PC

H -2.261704 1.216506 1.362189

H 1.156422 2.673742 -0.030145  
H 2.222754 -0.921902 -0.521894  
Cu 0.135297 0.132603 0.576379  
S -1.314948 -2.011151 0.499590  
C -0.707491 -2.353876 -1.212520  
H -0.998312 -3.370636 -1.491945  
H -1.191825 -1.662494 -1.909351  
C 0.819504 -2.217559 -1.272184  
H 1.275460 -2.906486 -0.553314  
H 1.158967 -2.526221 -2.271800  
C 1.377872 0.069624 -2.098240  
H 0.421267 0.049666 -2.633061  
H 2.149822 -0.250109 -2.813222  
C 1.702151 1.490398 -1.617595  
H 2.685869 1.488155 -1.136855  
H 1.758209 2.164074 -2.485007  
C -0.536713 2.496908 -1.174824  
H -0.819613 1.873954 -2.029674  
H -0.408952 3.518787 -1.560001  
C -1.657969 2.489276 -0.127674  
H -1.374911 3.133823 0.711992  
H -2.569953 2.915874 -0.570540  
C -2.795373 0.283735 -0.375326  
H -2.417470 0.246589 -1.402622  
H -3.810674 0.708605 -0.427312  
C -2.905954 -1.131762 0.204823  
H -3.543125 -1.749888 -0.434995  
H -3.379196 -1.106384 1.193299  
N 1.292032 -0.854814 -0.947905  
N 0.720623 1.961064 -0.613316  
N -1.891094 1.133720 0.415905  
O 3.846321 -0.694486 0.559201  
H 4.756534 -1.014557 0.454064  
H 3.718948 -0.569642 1.513986  
O 0.369779 0.690711 2.517517  
O 1.528895 0.251426 2.721560

### 3-O-RC

H -1.621773 -0.783989 2.021492  
H 0.445944 -2.836712 -0.568639  
Cu -0.216064 -0.207211 -0.343077  
S 1.783333 0.554335 -1.812209  
C 2.912115 -0.631419 -0.962437  
H 3.869027 -0.659631 -1.492144  
H 3.100245 -0.284117 0.058667  
C 2.286117 -2.033438 -0.960384  
H 2.057917 -2.328634 -1.990208  
H 3.034699 -2.746541 -0.582305  
C 1.222037 -2.353666 1.259249  
H 1.998777 -1.673035 1.624937  
H 1.582290 -3.375507 1.454061  
C -0.083379 -2.133774 2.032704  
H -0.841133 -2.837586 1.669086  
H 0.087018 -2.363166 3.095747  
C 0.002345 0.252968 2.696832  
H 1.088995 0.157768 2.605703  
H -0.239441 0.093425 3.760429  
C -0.431848 1.672648 2.318178  
H -1.508092 1.805340 2.478290  
H 0.075618 2.405176 2.953691

C 1.647512 2.328951 0.445874  
H 2.128595 1.608448 1.114006  
H 1.907699 3.335865 0.790169  
C 2.148862 2.160189 -0.993845  
H 3.229888 2.332612 -1.023124  
H 1.690540 2.906875 -1.650922  
N 1.033409 -2.099620 -0.180887  
N -0.619214 -0.769903 1.838939  
O -1.789276 -0.774242 -1.768104  
H -1.610379 -0.531977 -2.691316  
H -2.711719 -0.517192 -1.600143  
O -5.825391 -0.023447 -1.069699  
O -4.662415 0.044993 -0.727559  
S -0.183591 2.122863 0.551037

### 3-O-TS

H -1.666015 -2.348441 0.511520  
H 2.158477 -1.755102 0.350999  
Cu 0.059994 -0.395258 -0.484325  
S 1.332694 1.853642 -0.516253  
C 2.123848 1.472876 1.106384  
H 2.906241 2.211473 1.304346  
H 1.375293 1.551125 1.901509  
C 2.739904 0.067376 1.063890  
H 3.447740 0.004833 0.231597  
H 3.316568 -0.086208 1.988295  
C 1.136063 -1.511967 2.120205  
H 0.845421 -0.655372 2.738526  
H 1.855974 -2.097895 2.711317  
C -0.087381 -2.387096 1.818601  
H 0.227778 -3.263627 1.240760  
H -0.506606 -2.758507 2.765763  
C -1.985413 -0.790055 1.794109  
H -1.362324 -0.151329 2.428647  
H -2.629833 -1.372540 2.472348  
C -2.889586 0.072315 0.906702  
H -3.566295 -0.555656 0.315878  
H -3.518388 0.718497 1.527194  
C -1.228644 2.414093 0.657950  
H -0.936457 2.003584 1.629332  
H -1.960235 3.209649 0.836036  
C -0.020860 3.016732 -0.072276  
H 0.398720 3.830717 0.527879  
H -0.327161 3.451647 -1.029468  
N 1.731212 -0.993875 0.876450  
N -1.096158 -1.666539 1.011202  
O 2.080496 -1.197610 -2.139339  
H 2.390767 -0.427801 -2.644385  
H 2.123846 -1.939335 -2.765130  
O -0.934980 -1.559519 -2.154794  
O -0.952608 -1.090187 -3.288361  
S -2.022042 1.094393 -0.354031

### 3-O-PC

H -0.413910 -2.861756 0.292881  
H -2.506597 0.268481 -0.616509  
Cu -0.117278 -0.092961 0.569343  
S 0.711332 2.307548 0.147005  
C 0.036581 2.224373 -1.569697  
H 0.081454 3.221253 -2.017818

H 0.659062 1.554977 -2.172275  
C -1.421359 1.742659 -1.534232  
H -2.008220 2.404660 -0.888582  
H -1.838111 1.833637 -2.548796  
C -1.390485 -0.688105 -2.035920  
H -0.476733 -0.474701 -2.602636  
H -2.218404 -0.692063 -2.760517  
C -1.302348 -2.071289 -1.378975  
H -2.233717 -2.267110 -0.837093  
H -1.207162 -2.839756 -2.160240  
C 1.126811 -2.433364 -0.980891  
H 1.281052 -1.755149 -1.826460  
H 1.176049 -3.456640 -1.386154  
C 2.260863 -2.272376 0.039146  
H 2.161061 -3.004948 0.848270  
H 3.227779 -2.457043 -0.439135  
C 2.884597 0.504959 -0.404370  
H 2.458387 0.198639 -1.364544  
H 3.975181 0.438211 -0.481523  
C 2.504267 1.954112 -0.072955  
H 2.900164 2.618552 -0.848024  
H 2.956955 2.264730 0.874479  
N -1.568820 0.366750 -1.017178  
N -0.195394 -2.144645 -0.397761  
O -4.235325 -0.117894 0.257084  
H -5.136028 -0.112343 -0.104530  
H -4.337379 0.033490 1.210866  
O -1.044681 -0.186929 2.486996  
O -2.143431 0.305627 2.736669  
S 2.316394 -0.654187 0.915704

#### 4-O-RC

H -0.070409 -2.678150 -0.325218  
H 0.165243 2.703435 -0.073112  
Cu 0.209522 0.022625 -0.422012  
S -2.226549 -0.144761 -1.256573  
C -2.778360 1.127971 -0.038237  
H -3.794050 1.444609 -0.293062  
H -2.808754 0.676587 0.958138  
C -1.845181 2.345105 -0.064705  
H -1.798014 2.743568 -1.083629  
H -2.285422 3.131508 0.567771  
C -0.255087 2.052102 1.814728  
H -0.941053 1.330643 2.272013  
H -0.503549 3.038082 2.240972  
C 1.192499 1.730202 2.199455  
H 1.869751 2.509468 1.830533  
H 1.295224 1.713279 3.288839  
C 1.003698 -1.142920 2.442736  
H 0.088970 -0.723197 2.871876  
H 1.639219 -1.472635 3.269935  
C 0.692443 -2.340949 1.536856  
H 1.623315 -2.711416 1.094549  
H 0.289043 -3.151543 2.163279  
C -1.656640 -2.058870 0.795663  
H -1.823274 -1.351897 1.615436  
H -1.940502 -3.054869 1.173395  
C -2.573610 -1.728882 -0.386277  
H -3.618788 -1.742010 -0.062092  
H -2.477601 -2.488848 -1.170739

N -0.464838 2.026553 0.356520  
N -0.229119 -2.010079 0.428633  
O 1.334177 0.270680 -2.292222  
H 0.928313 0.171701 -3.168272  
H 2.283935 0.094833 -2.401905  
O 5.438797 0.236275 -2.240662  
O 4.437794 -0.407566 -2.480784  
S 1.887777 0.175094 1.499863

#### 4-O-TS1

H -1.561891 0.798377 1.776075  
H 2.344894 -0.605915 -1.454676  
Cu 0.623014 0.035421 0.414097  
S -0.697943 -2.186083 0.317873  
C -0.506397 -2.319329 -1.515449  
H -0.760090 -3.338999 -1.819669  
H -1.218143 -1.640906 -1.995943  
C 0.932624 -2.001685 -1.938621  
H 1.619852 -2.679138 -1.420861  
H 1.031793 -2.207253 -3.015496  
C 1.006007 0.378284 -2.646399  
H -0.083214 0.405312 -2.762528  
H 1.421744 0.098666 -3.628315  
C 1.543011 1.768144 -2.292563  
H 2.639321 1.764323 -2.285918  
H 1.234884 2.493357 -3.051861  
C -0.719262 2.738799 -0.809576  
H -1.095437 2.189548 -1.678255  
H -0.862376 3.805618 -1.004222  
C -1.481308 2.353191 0.462810  
H -1.060483 2.894007 1.316930  
H -2.524838 2.686132 0.354841  
C -2.414999 0.088365 0.067565  
H -2.248476 0.191103 -1.010117  
H -3.437263 0.448248 0.266973  
C -2.346542 -1.383339 0.484768  
H -3.084761 -1.966578 -0.074004  
H -2.593851 -1.494063 1.546982  
N 1.338021 -0.618771 -1.615894  
N -1.413182 0.908527 0.772376  
O 2.787382 -0.396412 1.051632  
H 2.934163 -1.132321 1.669444  
H 3.257081 0.360194 1.441055  
O 0.734088 0.288122 2.869976  
O -0.231870 0.546849 3.586580  
S 1.087433 2.409230 -0.627858

#### 4-O-IM

H -1.609493 0.800045 1.757405  
H 2.322558 -0.592904 -1.342757  
Cu 0.605105 0.043145 0.456657  
S -0.739332 -2.175011 0.345967  
C -0.518528 -2.309373 -1.483364  
H -0.765443 -3.329426 -1.791692  
H -1.221512 -1.631252 -1.977063  
C 0.927658 -1.989347 -1.875608  
H 1.605831 -2.665630 -1.344624  
H 1.052692 -2.189557 -2.950291  
C 1.026482 0.390053 -2.586045  
H -0.058146 0.421171 -2.738040

H 1.473637 0.102231 -3.551067  
C 1.560308 1.776954 -2.218019  
H 2.655819 1.767645 -2.179187  
H 1.277118 2.504664 -2.984520  
C -0.744766 2.744330 -0.806032  
H -1.091695 2.194169 -1.686192  
H -0.879293 3.811301 -1.005649  
C -1.547259 2.356355 0.441001  
H -1.158041 2.900519 1.307841  
H -2.587808 2.685280 0.297732  
C -2.472920 0.084500 0.051371  
H -2.304424 0.177698 -1.027377  
H -3.499487 0.436750 0.243021  
C -2.395819 -1.382013 0.485712  
H -3.122133 -1.979648 -0.073382  
H -2.651906 -1.482393 1.546793  
N 1.321777 -0.604683 -1.540718  
N -1.479608 0.914199 0.751196  
O 2.944612 -0.460943 0.932726  
H 3.105891 -1.213403 1.526581  
H 3.429876 0.279895 1.333457  
O 0.808574 0.317973 2.614753  
O -0.133293 0.560574 3.387170  
S 1.055956 2.415159 -0.566004

#### 4-O-TS2

H 0.005318 0.001822 0.008336  
H 0.002448 0.020543 5.251905  
Cu 0.268695 0.018080 2.717463  
S -0.316191 2.477078 2.370459  
C -1.660190 2.393044 3.635194  
H -1.967232 3.411616 3.889920  
H -2.524822 1.878941 3.204153  
C -1.159943 1.673270 4.893373  
H -0.281636 2.196223 5.286109  
H -1.940373 1.733943 5.666141  
C -1.860882 -0.709060 4.785081  
H -2.660080 -0.448216 4.082010  
H -2.301093 -0.668364 5.794182  
C -1.376788 -2.142941 4.544271  
H -0.673910 -2.446001 5.328629  
H -2.220418 -2.838339 4.587886  
C -1.760623 -2.260933 1.692121  
H -2.598301 -1.692724 2.107763  
H -2.125623 -3.260887 1.440288  
C -1.205935 -1.587358 0.430473  
H -0.352490 -2.163216 0.057640  
H -1.981799 -1.623895 -0.349284  
C -1.785836 0.827698 0.542544  
H -2.585508 0.599025 1.255990  
H -2.245228 0.821807 -0.459346  
C -1.229790 2.234511 0.789698  
H -2.034626 2.973359 0.728812  
H -0.497665 2.498990 0.018005  
N -0.771804 0.270943 4.634673  
N -0.745125 -0.204860 0.667944  
O 2.159006 -0.226249 4.829836  
H 2.819977 0.473130 4.962578  
H 2.668447 -1.053192 4.843505  
O 2.174867 -0.101752 1.771555

O 2.345248 -0.017566 0.546881  
S -0.445603 -2.422057 2.980027

#### 4-O-PC

H -2.357639 0.924177 1.614786  
H 2.239744 -0.654136 -0.705408  
Cu 0.045914 0.118632 0.627086  
S -1.194460 -2.096458 0.407756  
C -0.630964 -2.243501 -1.346347  
H -0.859375 -3.252116 -1.702893  
H -1.192503 -1.534569 -1.962676  
C 0.879514 -1.991526 -1.451134  
H 1.411040 -2.693600 -0.799977  
H 1.192791 -2.211978 -2.482934  
C 1.207645 0.373130 -2.133512  
H 0.186185 0.394840 -2.531103  
H 1.866573 0.097541 -2.972878  
C 1.631592 1.766268 -1.654034  
H 2.681822 1.755347 -1.344023  
H 1.537754 2.491492 -2.467945  
C -0.956067 2.739097 -0.807466  
H -1.122159 2.141934 -1.709411  
H -1.031601 3.794369 -1.085663  
C -2.000568 2.421324 0.270073  
H -1.781344 3.004426 1.170549  
H -2.986642 2.747286 -0.092753  
C -2.877480 0.141938 -0.196169  
H -2.531193 0.236372 -1.231044  
H -3.923608 0.486794 -0.178912  
C -2.859228 -1.325848 0.244050  
H -3.468684 -1.927262 -0.437298  
H -3.299916 -1.434240 1.241994  
N 1.275763 -0.625950 -1.051922  
N -2.020210 0.990834 0.654482  
O 4.047756 -0.397584 0.054799  
H 4.147982 -0.268077 1.012258  
H 4.917559 -0.690359 -0.261226  
O 1.053593 -0.174718 2.508171  
O 2.216009 0.163882 2.723954  
S 0.747393 2.411269 -0.171482

#### 5-O-RC

H 0.329408 -2.753739 -0.53164800  
Cu -0.236238 -0.138848 -0.37002800  
S 1.811783 0.601876 -1.84190900  
C 2.885929 -0.672537 -1.05180100  
H 3.814604 -0.759706 -1.62354000  
H 3.144167 -0.350581 -0.03800000  
C 2.169945 -2.028607 -1.03509800  
H 1.858607 -2.287175 -2.05273400  
H 2.890093 -2.797175 -0.71536500  
C 1.244403 -2.322248 1.24112400  
H 1.949144 -1.568160 1.60807600  
H 1.737703 -3.300397 1.36326900  
C -0.024246 -2.329537 2.09963400  
H -0.689538 -3.146124 1.79550500  
H 0.235496 -2.508241 3.14771300  
C -0.072987 0.437850 2.86374500  
H 0.988055 0.200342 2.74342700  
H -0.309150 0.392202 3.93237800



C -0.379953 1.850999 2.35413500  
H -1.440173 2.089018 2.48939400  
H 0.188042 2.584107 2.93659900  
C 1.770109 2.270653 0.49529800  
H 2.209807 1.495594 1.13067500  
H 2.075686 3.247103 0.88701400  
C 2.266297 2.145420 -0.94994800  
H 3.355387 2.256266 -0.97178900  
H 1.851860 2.947995 -1.56906100  
N 0.963793 -2.037194 -0.17842400  
O -1.777944 -0.599995 -1.84539200  
H -1.682305 -0.225752 -2.73628200  
H -2.716062 -0.500061 -1.60925000  
O -5.866486 -0.656713 -1.28353300  
O -4.785097 -0.258758 -0.90083700  
S -0.068588 2.153226 0.56700000  
S -1.080508 -0.829467 1.98025300

#### 5-O-TS

H 1.890870 -1.896570 0.432208  
Cu 0.005763 -0.161945 0.481967  
S -1.705641 -1.602887 -0.779731  
C -0.392306 -2.120160 -1.971356  
H -0.775083 -2.939606 -2.586683  
H -0.153169 -1.281822 -2.633666  
C 0.852850 -2.588092 -1.203748  
H 0.570926 -3.386261 -0.508868  
H 1.560522 -3.026650 -1.922917  
C 2.505265 -0.740271 -1.153303  
H 2.039729 -0.313832 -2.049220  
H 3.323500 -1.390249 -1.503537  
C 3.131877 0.365455 -0.295113  
H 3.714381 -0.071685 0.523734  
H 3.826831 0.959091 -0.896950  
C 1.267862 2.485244 -0.837983  
H 1.251623 1.868007 -1.741128  
H 1.933439 3.335246 -1.022681  
C -0.132076 3.023320 -0.515590  
H -0.107016 3.657427 0.376737  
H -0.483217 3.650332 -1.341869  
C -1.840191 1.086780 -1.804552  
H -0.925151 0.977402 -2.395076  
H -2.494888 1.797202 -2.320893  
C -2.580573 -0.251608 -1.674699  
H -2.852331 -0.613006 -2.671850  
H -3.514436 -0.120671 -1.118136  
N 1.485420 -1.507540 -0.420609  
O 1.366447 -1.833579 2.545233  
H 0.940818 -2.582296 2.994256  
H 1.816369 -1.343779 3.253033  
O -1.404154 -0.331150 2.868402  
O -2.483888 0.145768 3.161909  
S -1.425829 1.768829 -0.141189  
S 1.954453 1.493971 0.560571

#### 5-O-PC

H 2.472963 0.293956 0.592001  
Cu 0.102007 -0.006178 -0.602773  
S -0.769192 2.368540 -0.066291  
C -0.045745 2.242274 1.627334

H -0.075715 3.229117 2.098359  
H -0.653757 1.561942 2.232261  
C 1.408477 1.759717 1.543661  
H 1.976533 2.425848 0.885532  
H 1.856552 1.841177 2.545515  
C 1.402619 -0.666448 2.037453  
H 0.430291 -0.550646 2.529708  
H 2.168420 -0.556181 2.821971  
C 1.546346 -2.073194 1.446851  
H 2.549871 -2.206251 1.028720  
H 1.415405 -2.826859 2.229328  
C -1.221884 -2.595989 0.850165  
H -1.248008 -1.938488 1.724247  
H -1.356034 -3.624845 1.201082  
C -2.357018 -2.262332 -0.125553  
H -2.340516 -2.940821 -0.984842  
H -3.322649 -2.401667 0.371786  
C -2.882454 0.503137 0.503790  
H -2.421325 0.175334 1.440787  
H -3.968737 0.407303 0.607162  
C -2.546208 1.969989 0.205596  
H -2.925942 2.601796 1.015110  
H -3.040468 2.298445 -0.714589  
N 1.542430 0.386080 1.012135  
O 4.200587 -0.137867 -0.270763  
H 5.105442 -0.014063 0.058158  
H 4.282721 -0.201074 -1.236483  
O 1.061479 0.300435 -2.555647  
O 2.123269 -0.209033 -2.892900  
S -2.323691 -0.583716 -0.878011  
S 0.430045 -2.465507 0.036669

#### 6-O-RC

H -1.012635 0.731086 1.774709  
H 2.428743 -0.535363 -2.038552  
Cu 0.939181 0.292550 0.020605  
C -0.490590 -2.089659 -1.584502  
H -0.818149 -3.121927 -1.771499  
H -1.209611 -1.418489 -2.073698  
C 0.909022 -1.892742 -2.156767  
H 1.598183 -2.566629 -1.637789  
H 0.901062 -2.179606 -3.219566  
C 0.903514 0.460308 -2.956103  
H -0.190035 0.416941 -2.942666  
H 1.218300 0.192758 -3.977778  
C 1.377522 1.891631 -2.677394  
H 2.464605 1.970151 -2.795542  
H 0.930380 2.578659 -3.402481  
C -0.762399 2.718383 -0.897389  
H -1.213251 2.135813 -1.706852  
H -1.010399 3.770591 -1.064941  
C -1.301532 2.279971 0.472423  
H -0.812543 2.866777 1.257028  
H -2.374993 2.519822 0.513209  
C -2.099641 -0.059743 0.237525  
H -2.239059 0.160559 -0.826266  
H -3.072718 0.106787 0.726933  
C -1.699681 -1.526067 0.428562  
H -2.492811 -2.182340 0.045343  
H -1.569967 -1.747244 1.493428

N 1.411576 -0.510700 -1.965984  
N -1.060036 0.848892 0.762917  
O 1.927885 -0.607290 1.727160  
H 1.915838 -1.577626 1.764742  
H 2.783173 -0.324912 2.089274  
O -0.845997 0.679438 4.280870  
O 0.128067 0.710676 5.005422  
S 1.077930 2.527412 -0.972292  
O -0.445943 -1.839839 -0.180341

#### 6-O-TS1

H 0.524459 -1.583163 -2.064927  
Cu -0.301142 0.353991 -0.479110  
S 2.042245 1.467588 -0.177264  
C 2.891356 -0.174176 -0.187640  
H 3.962689 -0.009736 -0.334920  
H 2.759853 -0.647696 0.789728  
C 2.352337 -1.067550 -1.312581  
H 2.457823 -0.547497 -2.270790  
H 2.981617 -1.968910 -1.369567  
C 0.690164 -2.615699 -0.310648  
H 1.194079 -2.469244 0.650953  
H 1.123385 -3.521852 -0.763199  
C -0.809751 -2.836106 -0.097757  
H -1.309896 -3.013012 -1.056221  
H -0.975824 -3.719178 0.533378  
C -1.343176 -1.551161 1.874226  
H -0.359537 -1.892212 2.225921  
H -2.106177 -2.168670 2.367745  
C -1.574397 -0.087678 2.229118  
H -2.562611 0.211394 1.869526  
H -1.565157 0.024138 3.323154  
C 0.723971 0.853349 2.291215  
H 1.114860 -0.167588 2.337442  
H 0.596577 1.191756 3.331400  
C 1.736568 1.779267 1.611342  
H 2.687956 1.743981 2.150941  
H 1.393529 2.820080 1.642299  
N 0.926922 -1.419296 -1.142080  
O -0.716745 0.738943 -2.574066  
H -0.171509 1.421555 -3.000105  
H -1.643666 0.986342 -2.755504  
O -2.572345 1.427152 -0.427944  
O -3.203452 1.551640 -1.480326  
N -0.577898 0.813033 1.589989  
H -0.970097 1.755773 1.595703  
O -1.447554 -1.686615 0.458391

#### 6-O-IM

H -0.843344 -1.746830 -1.676146  
H 0.385228 1.495495 2.114054  
Cu -0.319588 -0.421259 0.474465  
S 2.140451 -1.298600 0.060364  
C 2.848166 0.406042 0.153361  
H 3.930531 0.325240 0.288649  
H 2.670537 0.918064 -0.796942  
C 2.242769 1.186537 1.326270  
H 2.403217 0.628310 2.254772  
H 2.787745 2.137112 1.429220  
C 0.442348 2.635536 0.420532

H 0.940387 2.585316 -0.554058  
H 0.807502 3.546879 0.919702  
C -1.074012 2.737399 0.241795  
H -1.569375 2.819099 1.215461  
H -1.329422 3.633262 -0.339193  
C -1.532714 1.515178 -1.788162  
H -0.594407 1.967233 -2.138041  
H -2.362801 2.080740 -2.232748  
C -1.631061 0.056203 -2.213739  
H -2.577419 -0.355113 -1.852263  
H -1.633464 -0.003025 -3.311677  
C 0.746817 -0.662096 -2.355589  
H 1.051689 0.388790 -2.350117  
H 0.629000 -0.952725 -3.411073  
C 1.841770 -1.537231 -1.739767  
H 2.780264 -1.393103 -2.283714  
H 1.585438 -2.599563 -1.826633  
N 0.789768 1.418286 1.180573  
N -0.539469 -0.772460 -1.635477  
O -0.512826 -0.887050 2.581219  
H 0.115946 -1.534310 2.942968  
H -1.404349 -1.259451 2.740537  
O -2.249207 -1.607893 0.424524  
O -2.847692 -1.849014 1.491653  
O -1.616357 1.564770 -0.365139

#### 6-O-TS2

H 0.333744 2.639972 -0.185159  
H -0.794001 -2.400098 -0.376511  
Cu -0.216995 0.052963 -0.603247  
S 2.319256 -0.165619 -0.862967  
C 2.345014 -1.548658 0.364547  
H 3.306276 -2.064399 0.288257  
H 2.268243 -1.131990 1.373463  
C 1.206198 -2.538537 0.085347  
H 1.286883 -2.903123 -0.943928  
H 1.328157 -3.408785 0.746077  
C -0.665131 -1.981107 1.624091  
H 0.074151 -1.529240 2.294430  
H -0.817474 -3.016941 1.963101  
C -1.993165 -1.225339 1.710796  
H -2.742445 -1.697400 1.067447  
H -2.374272 -1.242951 2.739496  
C -1.381897 1.059436 2.195998  
H -0.599381 0.603556 2.817792  
H -2.197784 1.374544 2.859410  
C -0.843230 2.268753 1.442009  
H -1.649437 2.694300 0.836810  
H -0.528029 3.032737 2.167787  
C 1.573789 1.735319 1.159628  
H 1.476214 0.979369 1.945306  
H 1.899375 2.664751 1.652544  
C 2.664757 1.325975 0.163994  
H 3.613142 1.185207 0.691094  
H 2.828897 2.116835 -0.577156  
N -0.133673 -1.931990 0.246361  
N 0.256114 1.903517 0.516704  
O -2.032595 -1.559506 -2.004056  
H -1.879043 -1.778638 -2.937974  
H -2.956800 -1.262436 -1.966478

O -0.694583 1.174157 -2.306168  
O -1.797229 1.742309 -2.280782  
O -1.871653 0.118395 1.238454

6-O-PC

H -2.258248 0.952467 1.639122  
H 2.239184 -0.592640 -0.688105  
Cu 0.031918 0.022294 0.616654  
S -1.196577 -2.158444 0.364741  
C -0.597482 -2.235768 -1.385141  
H -0.796029 -3.237446 -1.776334  
H -1.163884 -1.521281 -1.990350  
C 0.910546 -1.949913 -1.448220  
H 1.442305 -2.648261 -0.794002  
H 1.254950 -2.142857 -2.474430  
C 1.166857 0.429688 -2.102969  
H 0.181723 0.334092 -2.573008  
H 1.916870 0.248949 -2.887455  
C 1.354620 1.845815 -1.552738  
H 2.343464 1.948011 -1.095907  
H 1.274605 2.581102 -2.363174  
C -0.870626 2.582372 -0.922562  
H -1.210863 2.018983 -1.802697  
H -0.835590 3.644989 -1.196478  
C -1.824775 2.393766 0.252782  
H -1.444314 2.962941 1.106168  
H -2.811137 2.800162 -0.012586  
C -2.827682 0.151859 -0.154418  
H -2.514767 0.253532 -1.198385  
H -3.861024 0.526685 -0.095992  
C -2.838692 -1.326941 0.250126  
H -3.483354 -1.890366 -0.431004  
H -3.255644 -1.450793 1.256347  
N 1.269131 -0.576818 -1.020578  
N -1.918139 0.971715 0.677188  
O 4.011152 -0.593447 0.122106  
H 4.100982 -0.512229 1.085546  
H 4.895260 -0.820308 -0.207293  
O 1.017485 0.546849 2.378317  
O 2.069326 -0.021113 2.684976  
O 0.421437 2.141382 -0.508505

## References

- (1) Hormann, J.; Perera, C.; Deibel, N.; Lentz, D.; Sarkar, B.; Kulak, N. Straightforward Approach to Efficient Oxidative DNA Cleaving Agents Based on Cu(II) Complexes of Heterosubstituted Cyclens. *Dalton Trans.* **2013**, *42*, 4357–4360.
- (2) Johnson, M. R.; Jones, N. F.; Sutherland, I. O.; Newton, R. F. Formation of Complexes between Aza Derivatives of Crown Ethers and Primary Alkylammonium Salts. Part 8. 12-Crown-4, 15-Crown-5, 21-Crown-7, and 24-Crown-8 Derivatives. *J. Chem. Soc. Perkin Trans. 1* **1985**, 1637–1643.
- (3) Glenny, M. W.; van de Water, L. G. A.; Vere, J. M.; Blake, A. J.; Wilson, C.; Driessen, W. L.; Reedijk, J.; Schröder, M. Improved Synthetic Methods to Mixed-Donor Thiacycrown Ethers. *Polyhedron* **2006**, *25*, 599–612.
- (4) Zhang, X.; Huang, D.; Chen, Y.-S.; Holm, R. H. Synthesis of Binucleating Macrocycles and Their Nickel(II) Hydroxo- and Cyano-Bridged Complexes with Divalent Ions: Anatomical Variation of Ligand Features. *Inorg. Chem.* **2012**, *51*, 11017–11029.
- (5) Gahan, L. R.; Grillo, V. A.; Hambley, T. W.; Hanson, G. R.; Hawkins, C. J.; Proudfoot, E. M.; Moubaraki, B.; Murray, K. S.; Wang, D. Synthetic, X-Ray Structure, Electron Paramagnetic Resonance, and Magnetic Studies of the Manganese(II) Complex of 1-Thia-4,7-diazacyclononane ([9]aneN<sub>2</sub>S). *Inorg. Chem.* **1996**, *35*, 1039–1044.
- (6) Alberts, A. H.; Lehn, J.-M.; Parker, D. Synthesis and Cryptate Complexes of Azathia Macropolycyclic Ligands Based on 12-Membered N<sub>2</sub>S<sub>2</sub> and 15-Membered N<sub>2</sub>S<sub>3</sub> Macrocyclic Subunits. *J. Chem. Soc. Dalton Trans.* **1985**, 2311–2317.
- (7) Bonger, K. M.; van den Berg, R. J. B. H. N.; Heitman, L. H.; IJzerman, A. P.; Oosterom, J.; Timmers, C. M.; Overkleeft, H. S.; van der Marel, G. A. Synthesis and Evaluation of Homo-Bivalent G<sub>n</sub>RHR Ligands. *Bioorg. Med. Chem.* **2007**, *15*, 4841–4856.
- (8) Hoffmann, P.; Steinhoff, A.; Mattes, R. Complexes of Acyclic and Cyclic Diazathiaalkanes. Crystal Structures of 1,7-Diaza-4-thiaheptane-tricarbonyl-molybdenum(0), 1-Thia-4,7-diazacyclononane-tricarbonyl-molybdenum(0) and 1-Thia-4,7-diazacyclononane-tricarbonyl-rhenium(I) bromide. *Zeitschrift für Naturforsch.* **1987**, *42b*, 867–873.
- (9) Afshar, S.; Marcus, S. T.; Gahan, L. R.; Hambley, T. W. Mercury(II) and Lead(II) Complexes of 1-Oxa-7-Thia-4,10-Diazacyclododecane ([12]aneN<sub>2</sub>OS). *Aust. J. Chem.* **1999**, *52*, 1–6.
- (10) Hancock, R. D.; Dobson, S. M.; Evers, A.; Wade, P. W.; Ngwenya, M. P.; Boeyens, J. C. A.; Wainwright, K. P. More Rigid Macrocyclic Ligands That Show Metal Ion Size-Based Selectivity. A Crystallographic, Molecular Mechanics, and Formation Constant Study of the Complexes of Bridged Cyclens. *J. Am. Chem. Soc.* **1988**, *110*, 2788–2794.
- (11) Kodama, M.; Koike, T.; Hoshiga, N.; Machida, R.; Kimura, E. Metal Chelates of Sulphur-Containing Polyamine Macrocycles and Oxygenation of the Corresponding Cobalt(II) Complexes. *Dalton Trans.* **1984**, 673–678.
- (12) Balakrishnan, K. P.; Kaden, T. A.; Siegfried, L.; Zuberbühler, A. D. Stabilities and Redox Properties of Cu(I) and Cu(II) Complexes with Macrocyclic Ligands Containing the N<sub>2</sub>S<sub>2</sub> Donor Set. *Helv. Chim. Acta* **1984**, *67*, 1060–1069.
- (13) Aragoni, M. C.; Arca, M.; Bencini, A.; Blake, A. J.; Caltagirone, C.; Decortes, A.; Demartin, F.; Devillanova, F. A.; Faggi, E.; Dolci, L. S.; Garau, A.; Isaia, F.; Lippolis, V.; Prodi, L.; Wilson, C.; Valtancoli, B.; Zaccheroni, N. Coordination Chemistry of *N*-Aminopropyl Pendant Arm Derivatives of Mixed N/S-, and N/S/O-Donor Macrocycles, and Construction of Selective Fluorimetric Chemosensors for Heavy Metal Ions. *Dalton Trans.* **2005**, 2994–3004.
- (14) Bernardo, M. M.; Schroeder, R. R.; Rorabacher, D. B. Electrochemical Properties of Copper(II)/Copper(I)-Macrocyclic Polythia Ether Complexes: Determination of Formal Potential Values and Cyclic Voltammetric Behavior. *Inorg. Chem.* **1991**, *30*, 1241–1247.
- (15) Nagaj, J.; Stokowa-Sołtys, K.; Kurowska, E.; Frączyk, T.; Jeżowska-Bojczuk, M.; Bal, W. Revised Coordination Model and Stability Constants of Cu(II) Complexes of Tris Buffer. *Inorg. Chem.* **2013**, *52*, 13927–13933.
- (16) Botta, M.; Ravera, M.; Barge, A.; Bottaro, M.; Osella, D. Relationship between Ligand Structure and Electrochemical and Relaxometric Properties of Acyclic Poly(Aminocarboxylate) Complexes of Eu(II). *Dalton Trans.* **2003**, 1628–1633.
- (17) Lechnitz, S.; Heinrich, J.; Kulak, N. A Fluorescence Assay for the Detection of Hydrogen Peroxide and Hydroxyl Radicals Generated by Metallonucleases. *Chem. Commun.* **2018**, *54*, 13411–13414.
